# Supplementary material for: A highly responsive pyruvate sensor reveals pathway-regulatory role of the mitochondrial pyruvate carrier MPC
Source: eLife. 2020 Mar 6;9:e53917. doi: 10.7554/eLife.53917 (PMC7077990; doi:10.7554/eLife.53917)
Supplement: Figure 1—figure supplement 2—source data 1. [file elife-53917-fig1-figsupp2-data1.xlsx]

## Sheet: 1-2A
PyronicSF
pH	pyruvate (mM)	F488 (normalized)
6.8	0.01	0.8252
6.8	0.05	0.9191
6.8	0.1	1.0146
6.8	0.5	1.9069
6.8	1	2.3736
pH	pyruvate (mM)	F488 (normalized)
7	0.01	0.8704
7	0.05	0.9594
7	0.1	1.0982
7	0.5	2.05
7	1	2.3987
pH	pyruvate (mM)	F488 (normalized)
7.2	0.01	1
7.2	0.05	1.1352
7.2	0.1	1.2225
7.2	0.5	2.117
7.2	1	2.6479
pH	pyruvate (mM)	F488 (normalized)
7.4	0.01	1.0965
7.4	0.05	1.2176
7.4	0.1	1.3652
7.4	0.5	2.2804
7.4	1	2.9065
pH	pyruvate (mM)	F488 (normalized)
7.6	0.01	1.2832
7.6	0.05	1.4934
7.6	0.1	1.4349
7.6	0.5	2.3523
7.6	1	2.886
pH	pyruvate (mM)	F488 (normalized)
7.8	0.01	1.4523
7.8	0.05	1.535
7.8	0.1	1.5316
7.8	0.5	2.5639
7.8	1	3.076

## Sheet: 1-2B
Data pH 7.2
Experimental points (colored circles)					fitted function (gray mesh)
(F-F0)/F0	H+ (nM)	pyruvate (mM)			(F-F0)/F0	H+ (nM)	pyruvate (mM)
-0.1647	158.489	0.01			-0.3125	157.5	0.0018842
-0.0695	158.489	0.05			-0.3125	168.75	0.0070002
0.0271	158.489	0.1			-0.3125	180	0.0117
0.9304	158.489	0.5			-0.125	90	0.0079308
1.4029	158.489	1			-0.125	101.25	0.0187
					-0.125	112.5	0.0282
-0.1189	100	0.01			-0.125	123.75	0.0368
-0.0288	100	0.05			-0.125	135	0.0445
0.1117	100	0.1			-0.125	146.25	0.0514
1.0752	100	0.5			-0.125	157.5	0.0577
1.4282	100	1			-0.125	168.75	0.0634
					-0.125	180	0.0687
0.0123	63.0957	0.01			0.0625	56.25	0.017
0.1492	63.0957	0.05			0.0625	67.5	0.0351
0.2376	63.0957	0.1			0.0625	78.75	0.0507
1.1431	63.0957	0.5			0.0625	90	0.0645
1.6805	63.0957	1			0.0625	101.25	0.0766
					0.0625	112.5	0.0873
0.11	39.8107	0.01			0.0625	123.75	0.0969
0.2326	39.8107	0.05			0.0625	135	0.1056
0.3821	39.8107	0.1			0.0625	146.25	0.1134
1.3085	39.8107	0.5			0.0625	157.5	0.1205
1.9423	39.8107	1			0.0625	168.75	0.127
					0.0625	180	0.1329
0.299	25.1189	0.01			0.25	33.75	0.0229
0.5118	25.1189	0.05			0.25	45	0.0509
0.4526	25.1189	0.1			0.25	56.25	0.0746
1.3813	25.1189	0.5			0.25	67.5	0.095
1.9216	25.1189	1			0.25	78.75	0.1127
					0.25	90	0.1281
0.4702	15.8489	0.01			0.25	101.25	0.1418
0.5539	15.8489	0.05			0.25	112.5	0.154
0.5505	15.8489	0.1			0.25	123.75	0.1649
1.5955	15.8489	0.5			0.25	135	0.1747
2.1139	15.8489	1			0.25	146.25	0.1836
					0.25	157.5	0.1917
					0.25	168.75	0.1991
					0.25	180	0.2059
					0.4375	22.5	0.0437
					0.4375	33.75	0.0813
					0.4375	45	0.1128
					0.4375	56.25	0.1396
					0.4375	67.5	0.1627
					0.4375	78.75	0.1828
					0.4375	90	0.2004
					0.4375	101.25	0.216
					0.4375	112.5	0.2299
					0.4375	123.75	0.2424
					0.4375	135	0.2537
					0.4375	146.25	0.2639
					0.4375	157.5	0.2731
					0.4375	168.75	0.2816
					0.4375	180	0.2894
					0.625	11.25	0.0534
					0.625	22.5	0.1047
					0.625	33.75	0.1472
					0.625	45	0.183
					0.625	56.25	0.2135
					0.625	67.5	0.2399
					0.625	78.75	0.2629
					0.625	90	0.2832
					0.625	101.25	0.3011
					0.625	112.5	0.3172
					0.625	123.75	0.3316
					0.625	135	0.3446
					0.625	146.25	0.3564
					0.625	157.5	0.3672
					0.625	168.75	0.3771
					0.625	180	0.3861
					0.8125	0	0.0447
					0.8125	11.25	0.1157
					0.8125	22.5	0.1737
					0.8125	33.75	0.2222
					0.8125	45	0.2631
					0.8125	56.25	0.2983
					0.8125	67.5	0.3287
					0.8125	78.75	0.3553
					0.8125	90	0.3789
					0.8125	101.25	0.3998
					0.8125	112.5	0.4185
					0.8125	123.75	0.4353
					0.8125	135	0.4505
					0.8125	146.25	0.4644
					0.8125	157.5	0.477
					0.8125	168.75	0.4886
					0.8125	180	0.4993
					1	0	0.1058
					1	11.25	0.1862
					1	22.5	0.2525
					1	33.75	0.3082
					1	45	0.3556
					1	56.25	0.3964
					1	67.5	0.4319
					1	78.75	0.4631
					1	90	0.4907
					1	101.25	0.5154
					1	112.5	0.5375
					1	123.75	0.5574
					1	135	0.5755
					1	146.25	0.5919
					1	157.5	0.607
					1	168.75	0.6208
					1	180	0.6336
					1.1875	0	0.175
					1.1875	11.25	0.2668
					1.1875	22.5	0.3433
					1.1875	33.75	0.408
					1.1875	45	0.4634
					1.1875	56.25	0.5114
					1.1875	67.5	0.5534
					1.1875	78.75	0.5904
					1.1875	90	0.6233
					1.1875	101.25	0.6528
					1.1875	112.5	0.6793
					1.1875	123.75	0.7032
					1.1875	135	0.725
					1.1875	146.25	0.7449
					1.1875	157.5	0.7631
					1.1875	168.75	0.7799
					1.1875	180	0.7954
					1.375	0	0.254
					1.375	11.25	0.3599
					1.375	22.5	0.449
					1.375	33.75	0.5251
					1.375	45	0.5907
					1.375	56.25	0.648
					1.375	67.5	0.6984
					1.375	78.75	0.7431
					1.375	90	0.783
					1.375	101.25	0.8188
					1.375	112.5	0.8512
					1.375	123.75	0.8805
					1.375	135	0.9073
					1.375	146.25	0.9318
					1.375	157.5	0.9543
					1.375	168.75	0.9751
					1.375	180	0.9943
					1.5625	0	0.345
					1.5625	11.25	0.4685
					1.5625	22.5	0.5737
					1.5625	33.75	0.6644
					1.5625	45	0.7435
					1.5625	56.25	0.813
					1.5625	67.5	0.8746
					1.5625	78.75	0.9295
					1.5625	90	0.9789
					1.5625	101.25	1.0234
					1.5625	112.5	1.0638
					1.5625	123.75	1.1006
					1.5625	135	1.1343
					1.75	0	0.451
					1.75	11.25	0.5968
					1.75	22.5	0.7228
					1.75	33.75	0.833
					1.75	45	0.93
					1.75	56.25	1.0162
					1.75	67.5	1.0931
					1.9375	0	0.576
					1.9375	11.25	0.7508
					1.9375	22.5	0.9046
					1.9375	33.75	1.0411
					2.125	0	0.7257
					2.125	11.25	0.939
					2.125	22.5	1.1309
					2.3125	0	0.9081
					2.5	0	1.1353

## Sheet: 1-2C
black circles			fitted function
pH	Normalized F435		pH	Normalized F435
6.8	0.8251		6.8	0.8251
7.4	1		6.8047	0.8262
8	1.2862		6.8094	0.8272
			6.8141	0.8283
			6.8188	0.8294
			6.8234	0.8304
			6.8281	0.8315
			6.8328	0.8326
			6.8375	0.8337
			6.8422	0.8348
			6.8469	0.8359
			6.8516	0.837
			6.8563	0.8381
			6.8609	0.8392
			6.8656	0.8403
			6.8703	0.8414
			6.875	0.8426
			6.8797	0.8437
			6.8844	0.8448
			6.8891	0.846
			6.8938	0.8471
			6.8984	0.8482
			6.9031	0.8494
			6.9078	0.8505
			6.9125	0.8517
			6.9172	0.8529
			6.9219	0.854
			6.9266	0.8552
			6.9313	0.8564
			6.9359	0.8575
			6.9406	0.8587
			6.9453	0.8599
			6.95	0.8611
			6.9547	0.8623
			6.9594	0.8635
			6.9641	0.8647
			6.9688	0.8659
			6.9734	0.8672
			6.9781	0.8684
			6.9828	0.8696
			6.9875	0.8708
			6.9922	0.8721
			6.9969	0.8733
			7.0016	0.8746
			7.0063	0.8758
			7.0109	0.8771
			7.0156	0.8783
			7.0203	0.8796
			7.025	0.8809
			7.0297	0.8821
			7.0344	0.8834
			7.0391	0.8847
			7.0438	0.886
			7.0484	0.8873
			7.0531	0.8886
			7.0578	0.8899
			7.0625	0.8912
			7.0672	0.8925
			7.0719	0.8938
			7.0766	0.8951
			7.0813	0.8965
			7.0859	0.8978
			7.0906	0.8991
			7.0953	0.9005
			7.1	0.9018
			7.1047	0.9032
			7.1094	0.9046
			7.1141	0.9059
			7.1188	0.9073
			7.1234	0.9087
			7.1281	0.91
			7.1328	0.9114
			7.1375	0.9128
			7.1422	0.9142
			7.1469	0.9156
			7.1516	0.917
			7.1563	0.9185
			7.1609	0.9199
			7.1656	0.9213
			7.1703	0.9227
			7.175	0.9242
			7.1797	0.9256
			7.1844	0.927
			7.1891	0.9285
			7.1938	0.93
			7.1984	0.9314
			7.2031	0.9329
			7.2078	0.9344
			7.2125	0.9358
			7.2172	0.9373
			7.2219	0.9388
			7.2266	0.9403
			7.2313	0.9418
			7.2359	0.9433
			7.2406	0.9449
			7.2453	0.9464
			7.25	0.9479
			7.2547	0.9494
			7.2594	0.951
			7.2641	0.9525
			7.2688	0.9541
			7.2734	0.9556
			7.2781	0.9572
			7.2828	0.9588
			7.2875	0.9603
			7.2922	0.9619
			7.2969	0.9635
			7.3016	0.9651
			7.3063	0.9667
			7.3109	0.9683
			7.3156	0.9699
			7.3203	0.9715
			7.325	0.9731
			7.3297	0.9748
			7.3344	0.9764
			7.3391	0.9781
			7.3438	0.9797
			7.3484	0.9814
			7.3531	0.983
			7.3578	0.9847
			7.3625	0.9864
			7.3672	0.988
			7.3719	0.9897
			7.3766	0.9914
			7.3813	0.9931
			7.3859	0.9948
			7.3906	0.9966
			7.3953	0.9983
			7.4	1
			7.4047	1.0017
			7.4094	1.0035
			7.4141	1.0052
			7.4188	1.007
			7.4234	1.0087
			7.4281	1.0105
			7.4328	1.0123
			7.4375	1.0141
			7.4422	1.0158
			7.4469	1.0176
			7.4516	1.0194
			7.4563	1.0213
			7.4609	1.0231
			7.4656	1.0249
			7.4703	1.0267
			7.475	1.0286
			7.4797	1.0304
			7.4844	1.0323
			7.4891	1.0341
			7.4938	1.036
			7.4984	1.0378
			7.5031	1.0397
			7.5078	1.0416
			7.5125	1.0435
			7.5172	1.0454
			7.5219	1.0473
			7.5266	1.0492
			7.5313	1.0512
			7.5359	1.0531
			7.5406	1.055
			7.5453	1.057
			7.55	1.0589
			7.5547	1.0609
			7.5594	1.0629
			7.5641	1.0648
			7.5688	1.0668
			7.5734	1.0688
			7.5781	1.0708
			7.5828	1.0728
			7.5875	1.0748
			7.5922	1.0769
			7.5969	1.0789
			7.6016	1.0809
			7.6063	1.083
			7.6109	1.085
			7.6156	1.0871
			7.6203	1.0891
			7.625	1.0912
			7.6297	1.0933
			7.6344	1.0954
			7.6391	1.0975
			7.6438	1.0996
			7.6484	1.1017
			7.6531	1.1039
			7.6578	1.106
			7.6625	1.1081
			7.6672	1.1103
			7.6719	1.1124
			7.6766	1.1146
			7.6813	1.1168
			7.6859	1.119
			7.6906	1.1212
			7.6953	1.1234
			7.7	1.1256
			7.7047	1.1278
			7.7094	1.13
			7.7141	1.1323
			7.7188	1.1345
			7.7234	1.1368
			7.7281	1.139
			7.7328	1.1413
			7.7375	1.1436
			7.7422	1.1459
			7.7469	1.1481
			7.7516	1.1505
			7.7563	1.1528
			7.7609	1.1551
			7.7656	1.1574
			7.7703	1.1598
			7.775	1.1621
			7.7797	1.1645
			7.7844	1.1668
			7.7891	1.1692
			7.7938	1.1716
			7.7984	1.174
			7.8031	1.1764
			7.8078	1.1788
			7.8125	1.1812
			7.8172	1.1837
			7.8219	1.1861
			7.8266	1.1886
			7.8313	1.191
			7.8359	1.1935
			7.8406	1.196
			7.8453	1.1985
			7.85	1.201
			7.8547	1.2035
			7.8594	1.206
			7.8641	1.2085
			7.8688	1.2111
			7.8734	1.2136
			7.8781	1.2162
			7.8828	1.2187
			7.8875	1.2213
			7.8922	1.2239
			7.8969	1.2265
			7.9016	1.2291
			7.9063	1.2317
			7.9109	1.2343
			7.9156	1.237
			7.9203	1.2396
			7.925	1.2423
			7.9297	1.245
			7.9344	1.2476
			7.9391	1.2503
			7.9438	1.253
			7.9484	1.2557
			7.9531	1.2584
			7.9578	1.2612
			7.9625	1.2639
			7.9672	1.2667
			7.9719	1.2694
			7.9766	1.2722
			7.9813	1.275
			7.9859	1.2778
			7.9906	1.2806
			7.9953	1.2834
			8	1.2862

## Sheet: 1-2D
PyronicSF trace			Dead-PyronicSF trace			Dead-PyronicSF points
pyruvate (mM)	F488 (normalized)		pyruvate (mM)	F488 (normalized)		pyruvate (mM)	F488 (normalized)
0.0001	1		1e-05	1.0096		0.0001	1
0.00010488	1		1.0583e-05	1.0096		0.001	1.0097
0.00011001	1		1.12e-05	1.0096		0.005	1.0148
0.00011538	1.0001		1.1853e-05	1.0096		0.01	1.0295
0.00012101	1.0001		1.2545e-05	1.0096		0.05	1.0206
0.00012692	1.0001		1.3276e-05	1.0096		0.1	1.04
0.00013312	1.0001		1.405e-05	1.0096		0.5	1.1144
0.00013962	1.0002		1.4869e-05	1.0096		1	1.1725
0.00014644	1.0002		1.5736e-05	1.0096		5	1.3073
0.00015359	1.0002		1.6654e-05	1.0096		10	1.3053
0.00016109	1.0003		1.7625e-05	1.0096		20	1.2883
0.00016896	1.0003		1.8653e-05	1.0096
0.00017721	1.0004		1.9741e-05	1.0096
0.00018586	1.0004		2.0892e-05	1.0096
0.00019494	1.0004		2.211e-05	1.0096
0.00020446	1.0005		2.3399e-05	1.0096
0.00021444	1.0005		2.4764e-05	1.0096
0.00022492	1.0006		2.6208e-05	1.0096
0.0002359	1.0006		2.7736e-05	1.0096
0.00024742	1.0007		2.9353e-05	1.0096
0.0002595	1.0008		3.1065e-05	1.0096
0.00027218	1.0008		3.2876e-05	1.0096
0.00028547	1.0009		3.4793e-05	1.0096
0.00029941	1.001		3.6822e-05	1.0096
0.00031403	1.001		3.8969e-05	1.0096
0.00032937	1.0012		4.1242e-05	1.0096
0.00034545	1.0013		4.3646e-05	1.0096
0.00036232	1.0014		4.6191e-05	1.0096
0.00038001	1.0015		4.8885e-05	1.0096
0.00039857	1.0015		5.1735e-05	1.0096
0.00041804	1.0016		5.4752e-05	1.0096
0.00043845	1.0017		5.7945e-05	1.0096
0.00045986	1.0018		6.1324e-05	1.0096
0.00048232	1.002		6.49e-05	1.0096
0.00050587	1.0021		6.8684e-05	1.0096
0.00053058	1.0022		7.2689e-05	1.0096
0.00055649	1.0023		7.6928e-05	1.0096
0.00058367	1.0025		8.1413e-05	1.0096
0.00061217	1.0026		8.6161e-05	1.0096
0.00064206	1.0027		9.1185e-05	1.0096
0.00067342	1.0029		9.6502e-05	1.0096
0.00070631	1.0031		0.00010213	1.0096
0.0007408	1.0033		0.00010808	1.0096
0.00077698	1.0035		0.00011439	1.0096
0.00081492	1.0037		0.00012106	1.0096
0.00085472	1.0039		0.00012812	1.0096
0.00089646	1.0041		0.00013559	1.0096
0.00094023	1.0043		0.00014349	1.0096
0.00098615	1.0045		0.00015186	1.0096
0.0010343	1.0048		0.00016072	1.0096
0.0010848	1.005		0.00017009	1.0096
0.0011378	1.0053		0.00018	1.0096
0.0011934	1.0056		0.0001905	1.0096
0.0012516	1.0059		0.00020161	1.0096
0.0013128	1.0062		0.00021337	1.0096
0.0013769	1.0065		0.00022581	1.0096
0.0014441	1.0069		0.00023897	1.0096
0.0015146	1.0072		0.00025291	1.0096
0.0015886	1.0077		0.00026766	1.0097
0.0016662	1.008		0.00028326	1.0097
0.0017475	1.0084		0.00029978	1.0097
0.0018329	1.0089		0.00031726	1.0097
0.0019224	1.0093		0.00033576	1.0097
0.0020163	1.0099		0.00035534	1.0097
0.0021147	1.0103		0.00037606	1.0097
0.002218	1.0108		0.00039799	1.0097
0.0023263	1.0114		0.0004212	1.0097
0.0024399	1.012		0.00044576	1.0097
0.0025591	1.0126		0.00047175	1.0097
0.0026841	1.0132		0.00049926	1.0097
0.0028151	1.0138		0.00052837	1.0097
0.0029526	1.0146		0.00055918	1.0098
0.0030968	1.0153		0.00059179	1.0098
0.003248	1.016		0.00062629	1.0098
0.0034067	1.0169		0.00066281	1.0098
0.003573	1.0177		0.00070146	1.0098
0.0037475	1.0187		0.00074237	1.0098
0.0039305	1.0195		0.00078565	1.0098
0.0041225	1.0206		0.00083147	1.0099
0.0043238	1.0215		0.00087995	1.0099
0.0045349	1.0227		0.00093126	1.0099
0.0047564	1.0237		0.00098556	1.0099
0.0049887	1.0249		0.001043	1.0099
0.0052323	1.0261		0.0011039	1.0099
0.0054878	1.0274		0.0011682	1.01
0.0057558	1.0287		0.0012363	1.01
0.0060369	1.0302		0.0013084	1.01
0.0063317	1.0317		0.0013847	1.01
0.0066409	1.0332		0.0014655	1.0101
0.0069652	1.0348		0.0015509	1.0101
0.0073054	1.0365		0.0016414	1.0101
0.0076621	1.0383		0.0017371	1.0102
0.0080363	1.0402		0.0018384	1.0102
0.0084288	1.0422		0.0019456	1.0102
0.0088404	1.0442		0.002059	1.0103
0.0092721	1.0464		0.0021791	1.0103
0.0097249	1.0486		0.0023061	1.0104
0.0102	1.051		0.0024406	1.0104
0.0107	1.0534		0.0025829	1.0105
0.0112	1.056		0.0027335	1.0105
0.0118	1.0586		0.0028929	1.0106
0.0123	1.0615		0.0030616	1.0106
0.0129	1.0644		0.0032402	1.0107
0.0136	1.0675		0.0034291	1.0108
0.0142	1.0707		0.0036291	1.0108
0.0149	1.0741		0.0038407	1.0109
0.0157	1.0776		0.0040646	1.011
0.0164	1.0813		0.0043016	1.0111
0.0172	1.0852		0.0045525	1.0112
0.0181	1.0893		0.0048179	1.0112
0.019	1.0934		0.0050989	1.0113
0.0199	1.0979		0.0053962	1.0114
0.0209	1.1025		0.0057108	1.0116
0.0219	1.1073		0.0060439	1.0117
0.0229	1.1123		0.0063963	1.0118
0.0241	1.1176		0.0067693	1.0119
0.0252	1.123		0.007164	1.0121
0.0265	1.1287		0.0075817	1.0122
0.0278	1.1347		0.0080238	1.0124
0.0291	1.141		0.0084917	1.0125
0.0305	1.1474		0.0089869	1.0127
0.032	1.1542		0.0095109	1.0129
0.0336	1.1612		0.0101	1.0131
0.0352	1.1685		0.0107	1.0133
0.037	1.1763		0.0113	1.0135
0.0388	1.1843		0.0119	1.0137
0.0407	1.1926		0.0126	1.0139
0.0426	1.2013		0.0134	1.0142
0.0447	1.2103		0.0141	1.0145
0.0469	1.2196		0.015	1.0147
0.0492	1.2294		0.0158	1.015
0.0516	1.2394		0.0168	1.0154
0.0541	1.25		0.0177	1.0157
0.0568	1.2609		0.0188	1.016
0.0595	1.2723		0.0199	1.0164
0.0624	1.2841		0.021	1.0168
0.0655	1.2963		0.0223	1.0172
0.0687	1.309		0.0236	1.0176
0.072	1.3222		0.0249	1.0181
0.0756	1.3357		0.0264	1.0186
0.0793	1.3499		0.0279	1.0191
0.0831	1.3644		0.0295	1.0196
0.0872	1.3794		0.0313	1.0202
0.0914	1.3951		0.0331	1.0208
0.0959	1.4111		0.035	1.0214
0.1006	1.4278		0.0371	1.0221
0.1055	1.4449		0.0392	1.0228
0.1106	1.4626		0.0415	1.0235
0.1161	1.4808		0.0439	1.0243
0.1217	1.4995		0.0465	1.0251
0.1277	1.5188		0.0492	1.026
0.1339	1.5386		0.0521	1.0269
0.1404	1.559		0.0551	1.0278
0.1473	1.5799		0.0583	1.0288
0.1545	1.6013		0.0617	1.0299
0.162	1.6233		0.0653	1.031
0.1699	1.6457		0.0691	1.0322
0.1782	1.6687		0.0732	1.0334
0.187	1.6922		0.0774	1.0347
0.1961	1.7162		0.0819	1.036
0.2057	1.7406		0.0867	1.0374
0.2157	1.7656		0.0918	1.0389
0.2262	1.7911		0.0971	1.0404
0.2373	1.8169		0.1028	1.042
0.2489	1.8431		0.1088	1.0437
0.261	1.8698		0.1151	1.0455
0.2738	1.8968		0.1218	1.0473
0.2871	1.9243		0.129	1.0493
0.3012	1.952		0.1365	1.0513
0.3159	1.98		0.1444	1.0534
0.3313	2.0083		0.1529	1.0556
0.3475	2.0368		0.1618	1.0578
0.3644	2.0655		0.1712	1.0602
0.3822	2.0945		0.1812	1.0627
0.4009	2.1235		0.1917	1.0652
0.4205	2.1528		0.2029	1.0679
0.441	2.1822		0.2148	1.0706
0.4626	2.2115		0.2273	1.0735
0.4851	2.2409		0.2405	1.0764
0.5088	2.2703		0.2546	1.0794
0.5337	2.2996		0.2694	1.0826
0.5597	2.3289		0.2851	1.0858
0.5871	2.358		0.3017	1.0891
0.6158	2.387		0.3193	1.0926
0.6458	2.4158		0.338	1.0961
0.6774	2.4445		0.3577	1.0997
0.7104	2.4729		0.3785	1.1034
0.7451	2.501		0.4006	1.1072
0.7815	2.5289		0.424	1.1111
0.8197	2.5564		0.4487	1.115
0.8597	2.5836		0.4748	1.119
0.9017	2.6104		0.5025	1.1231
0.9457	2.6368		0.5318	1.1273
0.9919	2.6629		0.5628	1.1315
1.0404	2.6885		0.5957	1.1358
1.0912	2.7136		0.6304	1.1401
1.1445	2.7383		0.6672	1.1445
1.2004	2.7625		0.7061	1.1489
1.259	2.7862		0.7472	1.1534
1.3205	2.8094		0.7908	1.1578
1.3849	2.8321		0.8369	1.1623
1.4526	2.8543		0.8857	1.1668
1.5235	2.8759		0.9374	1.1713
1.5979	2.897		0.992	1.1758
1.6759	2.9177		1.0499	1.1803
1.7578	2.9377		1.1111	1.1847
1.8436	2.9572		1.1759	1.1891
1.9337	2.9762		1.2444	1.1935
2.0281	2.9945		1.317	1.1979
2.1271	3.0125		1.3938	1.2022
2.231	3.0298		1.4751	1.2065
2.34	3.0467		1.5611	1.2107
2.4542	3.063		1.6521	1.2148
2.5741	3.0788		1.7485	1.2189
2.6998	3.0941		1.8504	1.2229
2.8316	3.1089		1.9583	1.2268
2.9699	3.1231		2.0725	1.2306
3.115	3.137		2.1933	1.2344
3.2671	3.1503		2.3212	1.2381
3.4266	3.1632		2.4566	1.2416
3.594	3.1756		2.5998	1.2451
3.7695	3.1875		2.7514	1.2485
3.9535	3.1991		2.9119	1.2518
4.1466	3.2102		3.0817	1.255
4.3491	3.2209		3.2614	1.2581
4.5615	3.2311		3.4516	1.2611
4.7843	3.2411		3.6528	1.264
5.0179	3.2507		3.8658	1.2668
5.263	3.2598		4.0912	1.2695
5.52	3.2686		4.3298	1.2721
5.7895	3.2771		4.5823	1.2746
6.0723	3.2852		4.8495	1.2771
6.3688	3.293		5.1323	1.2794
6.6798	3.3005		5.4315	1.2816
7.006	3.3077		5.7482	1.2838
7.3482	3.3145		6.0834	1.2858
7.707	3.3211		6.4382	1.2878
8.0834	3.3275		6.8136	1.2897
8.4782	3.3336		7.2109	1.2915
8.8922	3.3394		7.6314	1.2933
9.3264	3.3449		8.0764	1.2949
9.7819	3.3503		8.5473	1.2965
10.2596	3.3554		9.0457	1.298
10.7606	3.3604		9.5732	1.2995
11.2861	3.365		10.1314	1.3009
11.8373	3.3695		10.7222	1.3022
12.4153	3.3738		11.3474	1.3034
13.0216	3.3779		12.0091	1.3046
13.6576	3.3819		12.7093	1.3058
14.3245	3.3856		13.4504	1.3068
15.0241	3.3892		14.2347	1.3079
15.7578	3.3927		15.0648	1.3089
16.5273	3.3959		15.9432	1.3098
17.3344	3.3991		16.8729	1.3107
18.1809	3.4021		17.8568	1.3115
19.0688	3.4049		18.898	1.3123
20	3.4077		20	1.3131

## Sheet: 1-2E
Dead PyronicSF
pH	pyruvate (mM)	F488 (normalized)
6.8	0.01	0.7406
6.8	0.05	0.7482
6.8	0.1	0.741
6.8	0.5	0.8254
6.8	1	0.8808
pH	pyruvate (mM)	F488 (normalized)
7	0.01	0.8488
7	0.05	0.8484
7	0.1	0.8671
7	0.5	0.9255
7	1	0.9615
pH	pyruvate (mM)	F488 (normalized)
7.2	0.01	1
7.2	0.05	0.9914
7.2	0.1	1.0101
7.2	0.5	1.0818
7.2	1	1.1377
pH	pyruvate (mM)	F488 (normalized)
7.4	0.01	1.0928
7.4	0.05	1.1256
7.4	0.1	1.101
7.4	0.5	1.1815
7.4	1	1.2649
pH	pyruvate (mM)	F488 (normalized)
7.6	0.01	1.2418
7.6	0.05	1.2581
7.6	0.1	1.2428
7.6	0.5	1.3033
7.6	1	1.3392
pH	pyruvate (mM)	F488 (normalized)
7.8	0.01	1.3363
7.8	0.05	1.3286
7.8	0.1	1.3519
7.8	0.5	1.4065
7.8	1	1.488
