# Supplementary material for: A highly responsive pyruvate sensor reveals pathway-regulatory role of the mitochondrial pyruvate carrier MPC
Source: eLife. 2020 Mar 6;9:e53917. doi: 10.7554/eLife.53917 (PMC7077990; doi:10.7554/eLife.53917)
Supplement: Figure 1—source data 1. [file elife-53917-fig1-data1.xlsx]

## Sheet: 1B
Excitation wavelenght (nm)	+ pyruvate (fluorescence units)	SE		- pyruvate (fluorescence units)	SE
400	106136	10282.2		68225.8	5803.98
402	105949	10352.8		68835.1	5848.17
404	104533	10297.8		68240	6016.17
406	102642	10490.4		68370.4	5591.14
408	99940.6	9989.45		67596.6	5859.37
410	97468.7	9686.42		66933	5907.45
412	94905.9	9441.01		66242.4	5698.23
414	92753.4	9369.91		66628	6045.77
416	90468.4	9089.54		66791.7	5940.89
418	88039.9	8955.93		67098.9	5914.91
420	84935.4	8898.57		66960.1	5965.04
422	81665.6	8518.03		66791.9	6020.96
424	77656.6	8226.26		66306.9	6207.74
426	72776.8	7514.49		65409.7	5999.62
428	67741.9	7153.41		65263.1	6029.92
430	61828.6	6241.49		64871.7	6122.31
432	56397.4	5540.47		64903.9	6166.79
434	51159.4	4750.12		65556.2	6290.27
436	46283.3	4248.64		66858.1	6572.77
438	42102.6	3947.01		68478.3	6860.25
440	39232.1	3530.32		70724.2	7027.97
442	36933.9	3310.03		73993.3	7601.61
444	35888	3349.99		78769.7	8031.62
446	35476.4	3319.44		83318.2	8501.59
448	35584.2	3428.89		89097.6	9150.77
450	36382.3	3605.59		94899	9880.17
452	37519.6	3728.19		101903	10421
454	38884.2	3980.05		109651	11489.5
456	40926.7	4366.3		118860	12473.4
458	43268.2	4686.36		128688	13346.4
460	45508.2	5072.63		136994	14263
462	47718.4	5211.23		144793	15095
464	50250.8	5778.39		153156	15961.1
466	52717.8	6061.07		162338	16913.9
468	55500.4	6328.17		170133	17878.9
470	57562.7	6803.9		176263	18660.5
472	59451.3	7059.4		181696	18833.3
474	61427.3	7426.56		187116	19366.6
476	62812.8	7586.03		190970	20173.5
478	64671.9	7763.94		196675	20531.6
480	67482.9	8446.05		207098	21596.7
482	70236.9	8857.55		216709	22344.4
484	72681.4	9141.18		225641	23306.9
486	74989.1	9595.11		232884	23941.1
488	78011.3	9919.79		243290	24944.2
490	81390.7	10225.1		252751	26048.8
492	83920.7	10649.6		260965	26961.3
494	85533.9	10702.1		268216	28089.2
496	86893	10864.1		272390	28299.8
498	88024.8	11021.5		273991	28171.6
500	86859.9	10854.7		269182	27683.2
502	83867.1	10111.2		257301	26424.4
504	79098.1	9338.19		238990	25061.4
506	72790	8281.73		213937	22216.7
508	65038.1	7135.72		183930	19081.1
510	55519.6	5667.78		152258	15591.1
512	47244.8	4791.34		121673	12272.5
514	38640.2	3463.77		91312.2	9172.47
516	32123.7	2309.52		67441.8	6754.15

## Sheet: 1C
	Data points			PyronicSF curve fit			Pyronic FRET curve
	pyruvate (mM)	DF%		pyruvate (mM)	DF%		pyruvate (mM)	DF%
	0.005	4.45		0.00050587	0.2098		0.00050587	0.0941102
	0.01	5.94		0.00053058	0.2202		0.00053058	0.0986845
	0.05	20.05		0.00055649	0.2307		0.00055649	0.103479
	0.1	29.06		0.00058367	0.2517		0.00058367	0.108505
	0.5	121.73		0.00061217	0.2622		0.00061217	0.113773
	1	179.69		0.00064206	0.2727		0.00064206	0.119295
	5	232.1		0.00067342	0.2937		0.00067342	0.125086
	10	237.86		0.00070631	0.3146		0.00070631	0.131155
	20	227.48		0.0007408	0.3251		0.0007408	0.137515
				0.00077698	0.3461		0.00077698	0.144183
				0.00081492	0.3671		0.00081492	0.15117
				0.00085472	0.388		0.00085472	0.158495
				0.00089646	0.409		0.00089646	0.16617
				0.00094023	0.43		0.00094023	0.174213
				0.00098615	0.451		0.00098615	0.182644
				0.0010343	0.4824		0.0010343	0.191476
				0.0010848	0.5034		0.0010848	0.200731
				0.0011378	0.5349		0.0011378	0.210435
				0.0011934	0.5559		0.0011934	0.220605
				0.0012516	0.5873		0.0012516	0.231239
				0.0013128	0.6188		0.0013128	0.242409
				0.0013769	0.6502		0.0013769	0.254095
				0.0014441	0.6922		0.0014441	0.266331
				0.0015146	0.7237		0.0015146	0.279151
				0.0015886	0.7656		0.0015886	0.292591
				0.0016662	0.7971		0.0016662	0.306664
				0.0017475	0.839		0.0017475	0.321387
				0.0018329	0.8915		0.0018329	0.336828
				0.0019224	0.9334		0.0019224	0.352985
				0.0020163	0.9858		0.0020163	0.369908
				0.0021147	1.03		0.0021147	0.38761
				0.002218	1.08		0.002218	0.40616
				0.0023263	1.14		0.0023263	0.42557
				0.0024399	1.2		0.0024399	0.445889
				0.0025591	1.26		0.0025591	0.467163
				0.0026841	1.32		0.0026841	0.489424
				0.0028151	1.38		0.0028151	0.512698
				0.0029526	1.46		0.0029526	0.537068
				0.0030968	1.53		0.0030968	0.562559
				0.003248	1.6		0.003248	0.589217
				0.0034067	1.69		0.0034067	0.617118
				0.003573	1.77		0.003573	0.64627
				0.0037475	1.87		0.0037475	0.676765
				0.0039305	1.95		0.0039305	0.708642
				0.0041225	2.06		0.0041225	0.741974
				0.0043238	2.15		0.0043238	0.776797
				0.0045349	2.27		0.0045349	0.81318
				0.0047564	2.37		0.0047564	0.851209
				0.0049887	2.49		0.0049887	0.890929
				0.0052323	2.61		0.0052323	0.932405
				0.0054878	2.74		0.0054878	0.975715
				0.0057558	2.87		0.0057558	1.02093
				0.0060369	3.02		0.0060369	1.06813
				0.0063317	3.17		0.0063317	1.11737
				0.0066409	3.32		0.0066409	1.16875
				0.0069652	3.48		0.0069652	1.22234
				0.0073054	3.65		0.0073054	1.27822
				0.0076621	3.83		0.0076621	1.33647
				0.0080363	4.02		0.0080363	1.39718
				0.0084288	4.22		0.0084288	1.46043
				0.0088404	4.42		0.0088404	1.52631
				0.0092721	4.64		0.0092721	1.5949
				0.0097249	4.86		0.0097249	1.66629
				0.0102	5.1		0.0102	1.74061
				0.0107	5.34		0.0107	1.81818
				0.0112	5.6		0.0112	1.89509
				0.0118	5.86		0.0118	1.98653
				0.0123	6.15		0.0123	2.06203
				0.0129	6.44		0.0129	2.15179
				0.0136	6.75		0.0136	2.25539
				0.0142	7.07		0.0142	2.34323
				0.0149	7.41		0.0149	2.44463
				0.0157	7.76		0.0157	2.55909
				0.0164	8.13		0.0164	2.65802
				0.0172	8.52		0.0172	2.76973
				0.0181	8.93		0.0181	2.89369
				0.019	9.34		0.019	3.01587
				0.0199	9.79		0.0199	3.13633
				0.0209	10.25		0.0209	3.26818
				0.0219	10.73		0.0219	3.39798
				0.0229	11.23		0.0229	3.52579
				0.0241	11.76		0.0241	3.67658
				0.0252	12.3		0.0252	3.81241
				0.0265	12.87		0.0265	3.97004
				0.0278	13.47		0.0278	4.12463
				0.0291	14.1		0.0291	4.27627
				0.0305	14.74		0.0305	4.43636
				0.032	15.42		0.032	4.60432
				0.0336	16.12		0.0336	4.77952
				0.0352	16.85		0.0352	4.95077
				0.037	17.63		0.037	5.13889
				0.0388	18.43		0.0388	5.32236
				0.0407	19.26		0.0407	5.51117
				0.0426	20.13		0.0426	5.69519
				0.0447	21.03		0.0447	5.89321
				0.0469	21.96		0.0469	6.09487
				0.0492	22.94		0.0492	6.29962
				0.0516	23.94		0.0516	6.50694
				0.0541	25		0.0541	6.71633
				0.0568	26.09		0.0568	6.93529
				0.0595	27.23		0.0595	7.14715
				0.0624	28.41		0.0624	7.36718
				0.0655	29.63		0.0655	7.5942
				0.0687	30.9		0.0687	7.82015
				0.072	32.22		0.072	8.04469
				0.0756	33.57		0.0756	8.28039
				0.0793	34.99		0.0793	8.51315
				0.0831	36.44		0.0831	8.74277
				0.0872	37.94		0.0872	8.98043
				0.0914	39.51		0.0914	9.21371
				0.0959	41.11		0.0959	9.45293
				0.1006	42.78		0.1006	9.69171
				0.1055	44.49		0.1055	9.92941
				0.1106	46.26		0.1106	10.1654
				0.1161	48.08		0.1161	10.4079
				0.1217	49.95		0.1217	10.6428
				0.1277	51.88		0.1277	10.882
				0.1339	53.86		0.1339	11.1166
				0.1404	55.9		0.1404	11.35
				0.1473	57.99		0.1473	11.5847
				0.1545	60.13		0.1545	11.8164
				0.162	62.33		0.162	12.0446
				0.1699	64.57		0.1699	12.2716
				0.1782	66.87		0.1782	12.4965
				0.187	69.22		0.187	12.7211
				0.1961	71.62		0.1961	12.9396
				0.2057	74.06		0.2057	13.1564
				0.2157	76.56		0.2157	13.3685
				0.2262	79.11		0.2262	13.5774
				0.2373	81.69		0.2373	13.7845
				0.2489	84.31		0.2489	13.9871
				0.261	86.98		0.261	14.1848
				0.2738	89.68		0.2738	14.3803
				0.2871	92.43		0.2871	14.5699
				0.3012	95.2		0.3012	14.7575
				0.3159	98		0.3159	14.9397
				0.3313	100.83		0.3313	15.1175
				0.3475	103.68		0.3475	15.2915
				0.3644	106.55		0.3644	15.4603
				0.3822	109.45		0.3822	15.6255
				0.4009	112.35		0.4009	15.7866
				0.4205	115.28		0.4205	15.9431
				0.441	118.22		0.441	16.0949
				0.4626	121.15		0.4626	16.243
				0.4851	124.09		0.4851	16.3857
				0.5088	127.03		0.5088	16.5248
				0.5337	129.96		0.5337	16.6599
				0.5597	132.89		0.5597	16.7902
				0.5871	135.8		0.5871	16.9169
				0.6158	138.7		0.6158	17.0393
				0.6458	141.58		0.6458	17.1573
				0.6774	144.45		0.6774	17.2718
				0.7104	147.29		0.7104	17.3819
				0.7451	150.1		0.7451	17.4886
				0.7815	152.89		0.7815	17.5914
				0.8197	155.64		0.8197	17.6907
				0.8597	158.36		0.8597	17.7863
				0.9017	161.04		0.9017	17.8785
				0.9457	163.68		0.9457	17.9671
				0.9919	166.29		0.9919	18.0526
				1.0404	168.85		1.0404	18.1349
				1.0912	171.36		1.0912	18.214
				1.1445	173.83		1.1445	18.2901
				1.2004	176.25		1.2004	18.3632
				1.259	178.62		1.259	18.4334
				1.3205	180.94		1.3205	18.5009
				1.3849	183.21		1.3849	18.5656
				1.4526	185.43		1.4526	18.6279
				1.5235	187.59		1.5235	18.6875
				1.5979	189.7		1.5979	18.7448
				1.6759	191.77		1.6759	18.7997
				1.7578	193.77		1.7578	18.8524
				1.8436	195.72		1.8436	18.9029
				1.9337	197.62		1.9337	18.9513
				2.0281	199.45		2.0281	18.9977
				2.1271	201.25		2.1271	19.0421
				2.231	202.98		2.231	19.0847
				2.34	204.67		2.34	19.1255
				2.4542	206.3		2.4542	19.1645
				2.5741	207.88		2.5741	19.2018
				2.6998	209.41		2.6998	19.2376
				2.8316	210.89		2.8316	19.2718
				2.9699	212.31		2.9699	19.3045
				3.115	213.7		3.115	19.3358
				3.2671	215.03		3.2671	19.3658
				3.4266	216.32		3.4266	19.3944
				3.594	217.56		3.594	19.4218
				3.7695	218.75		3.7695	19.448
				3.9535	219.91		3.9535	19.473
				4.1466	221.02		4.1466	19.4969
				4.3491	222.09		4.3491	19.5198
				4.5615	223.11		4.5615	19.5416
				4.7843	224.11		4.7843	19.5625
				5.0179	225.07		5.0179	19.5824
				5.263	225.98		5.263	19.6015
				5.52	226.86		5.52	19.6197
				5.7895	227.71		5.7895	19.6371
				6.0723	228.52		6.0723	19.6537
				6.3688	229.3		6.3688	19.6695
				6.6798	230.05		6.6798	19.6847
				7.006	230.77		7.006	19.6991
				7.3482	231.45		7.3482	19.713
				7.707	232.11		7.707	19.7261
				8.0834	232.75		8.0834	19.7387
				8.4782	233.36		8.4782	19.7507
				8.8922	233.94		8.8922	19.7622
				9.3264	234.49		9.3264	19.7731
				9.7819	235.03		9.7819	19.7836
				10.2596	235.54		10.2596	19.7936
				10.7606	236.04		10.7606	19.8031
				11.2861	236.5		11.2861	19.8122
				11.8373	236.95		11.8373	19.8208
				12.4153	237.38		12.4153	19.8291
				13.0216	237.79		13.0216	19.837
				13.6576	238.19		13.6576	19.8445
				14.3245	238.56		14.3245	19.8517
				15.0241	238.92		15.0241	19.8586
				15.7578	239.27		15.7578	19.8651
				16.5273	239.59		16.5273	19.8714
				17.3344	239.91		17.3344	19.8773
				18.1809	240.21		18.1809	19.883
				19.0688	240.49		19.0688	19.8884
				20	240.77		20	19.8936

## Sheet: 1D
	DF%	SE
pyruvate (20mM)	240.575	4.1722
lactate (10mM)	9.6554	1.5811
glucose (1mM)	-5.7997	1.0981
acetate(1mM)	-3.8452	1.2283
b-hydroxybutyrate (1mM)	0.8013	0.9507
oxaloacetate (1mM)	3.597	2.495
succinate (1mM)	-5.1831	1.5636
a-ketoglutarate (1mM)	1.078	1.5377
malate (1mM)	-10.0723	1.689
citrate (1mM)	-7.9133	1.2571
glutamate (1mM)	-5.3707	1.26
NAD+ (0.1mM)	-11.5461	1.0427
NADH (0.2mM)	-9.1774	1.3386
UK-5099 (10mM)	-6.0847	2.0646
AR-C155858 (1mM)	-8.5851	1.3733

## Sheet: 1E
Time (min)	PyronicSF	mRuby	PyronicSF fluorescence change (% of basal)		Pyronic (mTFP)	Pyronic (Venus)	Pyronic FRET fluorescence change (% of basal)			time (min)		Bar graph
0	598.485	491.197	1		756.113	780.979	0.48		start of pyruvate pulse	3.1667		PyronicSF average	SE		Pyronic FRET average	SE
0.1667	586.905	498.569	-2.42		747.885	777.228	-0.11		end of pyruvate pulse	13.8333		207.474	4.6275		30.294	0.8896
0.3333	596.892	493.126	0.33		761.056	789.94	0
0.5	593.347	503.239	-2.27		779.254	806.305	0.2
0.6667	599.083	494.5	0.42		745.226	768.877	0.58
0.8333	598.361	494.988	0.2		774.189	801.914	0.25
1	597.343	488.8	1.3		749.653	778.171	0
1.1667	606.641	492.671	2.07		757.778	787.122	-0.08
1.3333	593.757	495.111	-0.59		766.407	795.36	-0.02
1.5	599.235	491.076	1.15		768.94	799.351	-0.31
1.6667	607.408	498.358	1.03		769.792	801.444	-0.42
1.8333	600.257	493.651	0.79		756.688	786.048	-0.08
2	599.892	489.192	1.65		753.637	782.656	-0.18
2.1667	605.146	489.472	2.48		758.811	786.411	0.22
2.3333	607.762	486.205	3.61		767.268	794.598	0.33
2.5	604.367	491.956	1.83		752.384	781.254	-0.13
2.6667	601.022	490.35	1.6		745.032	775.746	-0.21
2.8333	609.636	497.734	1.53		757.069	785.046	-0.09
3	604.412	492.336	1.76		754.381	785.951	-0.42
3.1667	615.967	485.294	5.21		743.956	773.857	-0.34
3.3333	602.633	475.446	5.06		750.312	779.018	-0.11
3.5	622.821	478.903	7.8		887.799	733.3	31.06
3.6667	733.326	488.638	24.4		904.354	735.079	33.64
3.8333	1044.12	478.875	80.73		878.892	716.667	33.53
4	1322.25	483.72	126.58		887.236	721.931	33.88
4.1667	1513.07	479.337	161.65		897.122	731.804	33.17
4.3333	1641.48	486.675	179.58		888.095	721.418	34.13
4.5	1704.95	478.981	195.05		897.522	728.346	34.1
4.6667	1751.8	477.774	203.92		896.732	727.937	33.7
4.8333	1772.13	481.669	204.96		913.824	740.871	34.09
5	1801.78	483.065	209.17		890.527	722.637	34.35
5.1667	1792.92	476.045	212.19		881.58	713.986	34.46
5.3333	1772.9	483.609	203.87		895.695	725.005	34.48
5.5	1795.42	486.506	205.9		899.981	727.633	34.74
5.6667	1770.1	487.358	201.06		888.351	718.499	34.55
5.8333	1786.19	484.542	205.56		893.785	723.794	34.46
6	1773.65	480.546	205.94		912.242	741.675	33.35
6.1667	1762.5	485.005	201.22		890.303	720.275	34.63
6.3333	1784.2	480.881	207.55		883.998	715.328	34.43
6.5	1753.99	478.824	203.64		894.457	727.386	33.79
6.6667	1790.63	474.845	212.58		905.063	730.568	34.87
6.8333	1777.07	476.972	208.83		904.383	730.503	34.61
7	1774.9	474.999	209.73		902.996	729.316	34.69
7.1667	1783.86	472.36	213.03		904.222	731.72	34.46
7.3333	1778.42	478.096	208.33		903.079	729.811	34.67
7.5	1784.74	479.471	208.54		900.725	727.399	34.75
7.6667	1768.01	479.623	205.55		891.545	720.383	34.88
7.8333	1766.84	483.786	202.72		903.862	731.945	34.3
8	1754.9	479.046	203.65		898.092	727.302	34.28
8.1667	1758.69	479.358	204.11		907.205	731.601	35.03
8.3333	1744.68	474.846	204.56		889.635	722.28	34.08
8.5	1737.14	465.182	209.54		900.3	726.37	34.93
8.6667	1727.51	467.677	206.18		904.011	729.205	34.75
8.8333	1752.96	473.5	206.87		880.753	711.975	34.97
9	1722.16	477.618	198.88		879.541	711.164	35.05
9.1667	1744.14	472.257	206.13		913.765	736.642	34.89
9.3333	1732.34	476.512	201.34		909.522	732.995	35.18
9.5	1715.97	469.757	202.79		877.157	710.053	34.75
9.6667	1729.3	473.143	202.96		896.545	721.974	35.25
9.8333	1711.06	468.357	202.82		902.208	725.083	35.58
10	1733.39	466.636	207.91		894.365	717.972	35.68
10.1667	1704.34	466.777	202.66		898.388	722.088	35.47
10.3333	1725.24	462.297	209.34		917.517	737.534	35.37
10.5	1724.15	465.504	207.01		885.594	712.494	35.28
10.6667	1698.32	474.703	196.55		897.57	721.083	35.72
10.8333	1704.77	470.268	200.49		916.102	732.593	36.03
11	1707.98	465.309	204.26		922.841	737.243	36.15
11.1667	1687.42	470.378	197.36		907.432	728.102	35.51
11.3333	1690.11	474.303	195.37		900.224	724.019	35.56
11.5	1688.39	470.853	197.23		902.559	726.347	35.45
11.6667	1671.21	465.501	197.59		912.644	733.922	35.22
11.8333	1676.37	474.019	193.14		920.993	739.467	35.34
12	1676.54	470.015	195.67		909.603	729.381	35.73
12.1667	1676.21	465.761	198.31		916.631	735.284	35.7
12.3333	1675.6	470.772	195.03		903.337	727.825	34.9
12.5	1687.65	461.964	202.81		909.64	730.885	35.46
12.6667	1661.97	461.942	198.22		906.035	728.397	35.34
12.8333	1655.13	464.8	195.17		912.367	732.633	35.49
13	1655.38	458.99	198.95		906.628	731.792	34.68
13.1667	1645.7	465.723	192.9		912.074	735.806	34.7
13.3333	1666.26	459.574	200.53		932.727	751.531	34.81
13.5	1639.06	468.207	190.17		907.968	729.511	35.5
13.6667	1651.32	457.362	199.28		897.404	725.698	34.35
13.8333	1621.24	459.378	192.54		912.862	733.556	35.33
14	1573.51	449.319	190.28		891.321	717.684	35.18
14.1667	631.835	456.517	14.72		877.654	713.951	33.82
14.3333	580.753	442.243	8.85		866.919	732.804	27.89
14.5	571.334	449.145	5.44		821.661	758.423	15.05
14.6667	558.003	446.742	3.53		773.979	754.949	7.62
14.8333	592.052	452.294	8.5		747.695	750.829	3.98
15	573.748	449.381	5.83		757.744	769.039	2.72
15.1667	543.808	452.589	-0.4		753.224	770.481	1.74
15.3333	554.171	447.256	2.7		761.455	779.679	1.68
15.5	545.608	452.193	0.01		749.693	771.03	1.22
15.6667	548.247	449.239	1.16		756.778	776.481	1.46
15.8333	554.934	450.168	2.18		741.416	764.141	0.67
16	549.221	437.873	3.97		735.681	757.388	0.97
16.1667	546.446	446.458	1.45		746.683	770.337	0.75
16.3333	544.488	454.274	-0.65		740.224	768.18	-0.1
16.5	537.871	454.677	-1.94		737.859	765.296	-0.02
16.6667	544.762	442.44	2.06		734.109	759.578	0.36
16.8333	539.83	448.303	-0.19		741.275	773.45	-0.71
17	542.161	447.076	0.52		745.323	775.497	-0.3
17.1667	549.094	443.314	2.67		743.64	772.487	-0.07
17.3333	545.662	450.654	0.37		751.811	781.848	-0.25
17.5	543.285	444.321	1.35		758.526	785.61	0.16
17.6667	542.69	446.253	0.8		769.092	798.272	-0.01
17.8333	532.393	441.015	0.06		760.12	790.832	-0.44
18	538.808	447.76	-0.25		740.028	772.801	-0.74
18.1667
18.3333
18.5
18.6667
18.8333
19
19.1667
19.3333
