# Supplementary material for: A highly responsive pyruvate sensor reveals pathway-regulatory role of the mitochondrial pyruvate carrier MPC
Source: eLife. 2020 Mar 6;9:e53917. doi: 10.7554/eLife.53917 (PMC7077990; doi:10.7554/eLife.53917)
Supplement: Figure 2—figure supplement 3—source data 1. [file elife-53917-fig2-figsupp3-data1.xlsx]

## Sheet: 2-3A
Time (min)	mito (#1)	nuc (#2)		Pulses	Time (min)		Time (min)	PyronicSF Nuc	PyronicSF mito	mCherry mito
0	-0.78	-0.45		start pyruvate	2.1667		0.166667	2802079	6906270	7023205
0.1667	0.68	-1		end pyruvate	7.1667		0.333333	2645306	6942146	7067433
0.3334	0.49	-1.9					0.5	2668917	6811379	7030291
0.5	0.27	-3.63					0.666667	2582518	6740912	6971127
0.6667	-1.21	-3.67					0.833333	2504381	6817305	7136682
0.8334	-1.33	-6.15					1	2490444	6768662	6983621
1	-0.58	-1.13					1.16667	2467848	6851321	7082266
1.1667	-1.1	-3.07					1.33333	2424410	6821492	7066420
1.3334	-1.68	-4.29					1.5	2423231	6727160	7073513
1.5	-1.72	-2.41					1.66667	2360945	6720739	7075272
1.6667	-4	-2					1.83333	2487326	6799089	7103586
1.8334	-2.75	-2.95					2	2438437	6824067	7167466
2	-0.49	-6.26					2.16667	2407782	6709412	7088307
2.1667	-1.91	-1.24					2.33333	2455101	6739513	7122937
2.3334	5.49	27.38					2.5	2465297	6722387	7273634
2.5	10.62	65.79					2.66667	2441340	6712129	7168852
2.6667	17.8	91.38					2.83333	2358190	6681779	6974722
2.8334	18.88	106.36					3	2484400	6711746	7107297
3	22.91	111.69					3.16667	3204393	7098865	6990039
3.1667	24.23	123.76					3.33333	4170736	7430631	6977249
3.3334	29.02	128.56					3.5	4814572	7878809	6947064
3.5	32.47	135.41					3.66667	5191282	8060914	7043441
3.6667	31.4	139.26					3.83333	5325404	8199372	6929431
3.8334	32.9	139.08					4	5629077	8409230	7031264
4	38.23	141.5					4.16667	5749752	8527542	6865537
4.1667	38.29	143.44					4.33333	5922089	8793637	6895031
4.3334	39.63	141.78					4.5	6018942	8870989	7012825
4.5	40.86	143.37					4.66667	6014413	8872194	6934538
4.6667	43.52	145.31					4.83333	6075387	9190403	6905844
4.8334	44.49	146.52					5	6124079	9250199	6947975
5	46.05	146.85					5.16667	6082304	9317842	6931780
5.1667	46.9	144.44					5.33333	6122275	9463312	6978289
5.3334	49.96	149.12					5.5	6171298	9472598	6855830
5.5	46.88	149.02					5.66667	6201580	9666936	6949469
5.6667	53.09	150.07					5.83333	6209945	9777606	6953886
5.8334	57.54	152.65					6	6149291	9784863	6918881
6	54.92	153.31					6.16667	6267009	9860082	6829796
6.1667	60.15	152.59					6.33333	6264581	9845151	6962574
6.3334	59.17	154.8					6.5	6290930	10157832	6892335
6.5	59.51	149.76					6.66667	6355795	10368795	6836719
6.6667	60.32	154.7					6.83333	6372313	10246299	6870201
6.8334	62.51	151.88					7	6354192	10569804	6855326
7	60.2	158.15					7.16667	6409931	10463521	6828502
7.1667	63.01	151.46					7.33333	6283215	10404066	6775001
7.3334	61.44	152.77					7.5	6407500	10606018	6871842
7.5	59.36	127.11					7.66667	6336567	10795957	6900688
7.6667	44.79	59.42					7.83333	6494105	10554062	6843343
7.8334	37.17	32.8					8	6326011	10786978	6873780
8	19.72	3.84					8.16667	6358826	10675036	6868454
8.1667	-0.32	-2.54					8.33333	5713311	10488788	6836849
8.3334	-2.75	-7.7					8.5	4010497	9587079	6877884
8.5	-3.91	-5.47					8.66667	3340785	8949088	6776510
8.6667	-5.19	-7.19					8.83333	2612294	7891550	6847151
8.8334	-2.72	-7.85					9	2451722	6508383	6781897
9	-2.28	-7.01					9.16667	2321943	6324771	6755712
9.1667	-4.23	-9.46					9.33333	2378128	6301888	6812054
							9.5	2334764	6323046	6927740
							9.66667	2318264	6390358	6823583

## Sheet: 2-3B
Time (min)	undetectable leak (#1 blue)	intermediate leak (#2 green)	maximum leak (#3 orange)		Pulses	Time (min)		Time (min)	mito-PyronicSF Cell 1	mito-PyronicSF Cell 2	mito-PyronicSF Cell 3		mito-mCherry Cell 1	mito-mCherry Cell 2	mito-mCherry Cell 3		Ratio Cell 1	Ratio Cell 2	Ratio Cell 3
0.1667	0.53	2.49	5.46		start pyruvate	4		1	4419307	4681591	6309665		4292587	5642000	13350397		1.02952	0.829775	0.47262
0.3333	0.91	3.43	3.82		end pyruvate	13.3		2	4396878	4810248	6195105		4255074	5744310	13314436		1.03333	0.837394	0.465292
0.5	1.59	1.81	0.73					3	4534710	4641278	6134168		4358783	5630711	13588435		1.04036	0.824279	0.451426
0.6667	2.25	0.55	2.56					4	4471416	4709285	6214484		4270381	5784844	13521431		1.04708	0.814073	0.459603
0.8333	1.15	-0.07	0.24					5	4445828	4783435	6189659		4292220	5912570	13777902		1.03579	0.809028	0.449245
1	2.92	0.21	-0.03					6	4487376	4719520	6127567		4257711	5817473	13677392		1.05394	0.811266	0.448007
1.1667	0.64	0.06	0.76					7	4372404	4646467	6078328		4242404	5735709	13461387		1.03064	0.810095	0.451538
1.3333	-0.41	-0.91	1.6					8	4369632	4638463	6141726		4284522	5781771	13488431		1.01986	0.802256	0.455333
1.5	0.33	-0.11	-0.7					9	4452514	4678146	6127663		4333573	5784512	13770184		1.02745	0.808737	0.444995
1.6667	-0.35	1.59	-2.05					10	4506572	4701436	6111181		4416315	5716378	13921505		1.02044	0.82245	0.438974
1.8333	2.68	-1.32	0.06					11	4380892	4592163	6132777		4166373	5747736	13676749		1.05149	0.798952	0.448409
2	-1.16	-2.08	-1.32					12	4313073	4589065	6152076		4261007	5788751	13910943		1.01222	0.792756	0.442247
2.1667	-0.55	-2.8	-2.85					13	4342383	4500677	5947089		4263857	5719322	13659215		1.01842	0.786925	0.43539
2.3333	-2.07	-0.25	-2.52					14	4281516	4654564	6023596		4269470	5763833	13788362		1.00282	0.807547	0.436861
2.5	-4.35	-0.42	-2.57					15	4320954	4559112	6002740		4411372	5654931	13748370		0.979503	0.806219	0.436615
2.6667	-4.71	-1.8	0.18					16	4070081	4479668	6031338		4170765	5634623	13434528		0.97586	0.795025	0.448943
2.8333	0.6	-0.39	-3.37					17	4211864	4616214	5830527		4088465	5723890	13463453		1.03018	0.806482	0.433063
3	-3.09	-1.41	-0.85					18	4030584	4489136	6029916		4061220	5624069	13569874		0.992456	0.798201	0.444361
3.1667	-1.84	-1.87	-2.36					19	4176342	4383512	5972133		4154659	5517491	13647994		1.00522	0.794476	0.437583
3.3333	-1.85	-4.42	-4.19					20	4328421	4473893	5975705		4306298	5781300	13917895		1.00514	0.773856	0.429354
3.5	-1	-2.95	-3.3					21	4087913	4528963	5980562		4032180	5763809	13800324		1.01382	0.785759	0.433364
3.6667	-3.57	-2.73	-3.89					22	4089001	4425552	5973321		4140875	5619950	13868519		0.987473	0.787472	0.430711
3.8333	-1.92	1.17	-2.23					23	4062840	4470089	5990300		4044873	5457417	13671604		1.00444	0.819085	0.438156
4	-1.89	0.5	6.07					24	3931092	4299018	6463161		3912635	5283468	13596745		1.00472	0.813674	0.475346
4.1667	5.41	45.04	78.62					25	3123826	6562534	11310385		2893837	5588535	14129239		1.07948	1.17429	0.800495
4.3333	12.99	71.04	113.85					26	2865599	7746485	13734082		2476619	5594128	14330587		1.15706	1.38475	0.958375
4.5	14.06	78.53	131.93					27	2858402	8157286	14847657		2447086	5643688	14285029		1.16808	1.44538	1.03939
4.6667	19.64	78.9	138.17					28	2877078	8302454	15273695		2348279	5732333	14310080		1.22519	1.44836	1.06734
4.8333	23.24	82.78	138.77					29	3149699	8367028	15368793		2495802	5654124	14362624		1.262	1.47981	1.07005
5	19.84	84.49	140.27					30	3208505	8679396	15710148		2614433	5811045	14589752		1.22723	1.4936	1.07679
5.1667	25.32	86.35	140.75					31	3304476	8614836	15602025		2574874	5710021	14460611		1.28335	1.50872	1.07893
5.3333	34.81	87.21	141.69					32	3648110	9002220	15723406		2642502	5939561	14516422		1.38055	1.51564	1.08315
5.5	34.36	91	141.92					33	3608504	9029272	15805415		2622551	5839254	14578148		1.37595	1.54631	1.08419
5.6667	38.83	93.58	142.61					34	4034576	9121125	15892021		2837811	5820019	14616386		1.42172	1.5672	1.08727
5.8333	36.52	94.25	145.6					35	4077579	9288247	15934406		2916707	5906060	14477170		1.39801	1.57266	1.10066
6	43.78	96.63	142.43					36	4252510	9337423	16095548		2888226	5865544	14814611		1.47236	1.59191	1.08646
6.1667	45.82	100.52	143.15					37	4485047	9598088	16116146		3003522	5912172	14789690		1.49326	1.62345	1.08969
6.3333	52.8	104.87	145.03					38	4458654	9602945	15991605		2849480	5789719	14562855		1.56473	1.65862	1.09811
6.5	55.45	106.65	142.4					39	4732550	9528845	15909954		2972977	5695430	14645798		1.59186	1.67307	1.08632
6.6667	53.42	104.11	149.21					40	4668016	9542906	16251703		2971129	5774947	14551692		1.57113	1.65247	1.11683
6.8333	50.66	103.36	143.37					41	5040651	9859561	16287424		3267097	5988446	14933621		1.54285	1.64643	1.09065
7	54.73	112.95	142.45					42	4920417	10205581	16125009		3105399	5919608	14840461		1.58447	1.72403	1.08656
7.1667	58.02	111.6	140.45					43	5010969	9948562	15954891		3096544	5807213	14806129		1.61825	1.71314	1.07759
7.3333	62.85	109.5	148.18					44	5259319	10295646	16244657		3153782	6070144	14605421		1.66762	1.69611	1.11223
7.5	60.63	110.56	145.59					45	5210925	9978225	15989798		3167884	5853274	14527845		1.64492	1.70473	1.10063
7.6667	66.59	115.57	144.08					46	5228553	10180003	16127019		3064908	5832833	14743567		1.70594	1.74529	1.09383
7.8333	67.25	113.06	145.75					47	5450669	10167822	16211156		3182390	5894599	14719716		1.71276	1.72494	1.10132
8	60.56	113.22	145.07					48	5404645	10068456	16122780		3287133	5832517	14679748		1.64418	1.72626	1.0983
8.1667	70.05	118.84	145.03					49	5446029	10459786	16182462		3127455	5903821	14736980		1.74136	1.7717	1.09809
8.3333	66.04	115.51	141.83					50	5533860	10323321	15975574		3254585	5916627	14741120		1.70033	1.7448	1.08374
8.5	69.25	118.83	149.32					51	5428926	10317666	16162761		3132348	5823629	14465637		1.73318	1.77169	1.11732
8.6667	66.66	120.7	140.49					52	5551669	10291055	15880745		3252917	5759533	14735142		1.70667	1.78679	1.07775
8.8333	74.97	120.04	147.82					53	5848578	10565157	16166016		3264192	5930680	14556280		1.79174	1.78144	1.11059
9	69.91	122.07	146.39					54	5637094	10360826	16228469		3239682	5762835	14696782		1.74001	1.79787	1.10422
9.1667	69.51	120.81	145.85					55	5537541	10637087	16205638		3190040	5950315	14708674		1.73588	1.78765	1.10177
9.3333	71.85	118.1	143.92					56	5751607	10555280	16101030		3268281	5977833	14729106		1.75983	1.76574	1.09314
9.5	69.87	124.93	147.5					57	5701448	10665897	16139648		3277612	5857017	14550970		1.73951	1.82105	1.10918
9.6667	67.7	122.15	144.45					58	5896723	10556103	16167753		3433678	5869384	14758149		1.71732	1.7985	1.09551
9.8333	74.7	117.36	146.46					59	5778673	10411164	16138950		3230169	5916195	14612053		1.78897	1.75977	1.1045
10	77.72	121.73	146.82					60	5940622	10566619	16093714		3264093	5886383	14549446		1.81999	1.7951	1.10614
10.1667	72	123.08	145.38					61	5856415	10369940	16127120		3324963	5741853	14665403		1.76135	1.80603	1.09967
10.3333	80.7	125.63	145.82					62	6111197	10524733	16013727		3302453	5761591	14536267		1.8505	1.82671	1.10164
10.5	74.4	123.17	147.51					63	5963979	10472958	15966478		3339379	5796529	14394397		1.78595	1.80676	1.10921
10.6667	75.9	126.65	148.8					64	6089621	10516025	15877283		3380570	5730998	14239861		1.80136	1.83494	1.11499
10.8333	76.54	123.7	145.93					65	6086413	10755941	15893611		3366672	5938916	14420696		1.80784	1.81109	1.10214
11	75.16	125.31	146.46					66	5864906	10540997	15993887		3269696	5778629	14480663		1.79372	1.82413	1.1045
11.1667	78.33	122.28	143.79					67	6099652	10722019	16071015		3340136	5957946	14709804		1.82617	1.79962	1.09254
11.3333	72.48	129.36	143.74					68	6056670	10617161	15866280		3429140	5717720	14525313		1.76624	1.85689	1.09232
11.5	74.11	123.86	145.41					69	6089102	10561978	16030657		3415082	5827665	14575749		1.783	1.81239	1.09982
11.6667	78.63	125.86	141.68					70	6132447	10707744	15829273		3352389	5855683	14614860		1.82928	1.82861	1.08309
11.8333	80.81	125.28	144.69					71	6087158	10687810	15959893		3287453	5859836	14554204		1.85163	1.82391	1.09658
12	75.56	127.69	145					72	6025271	10574735	16082589		3351490	5736686	14647496		1.79779	1.84335	1.09798
12.1667	77.94	122.85	146.76					73	6054890	10276945	16008194		3322908	5696087	14475671		1.82217	1.80421	1.10587
12.3333	82.16	129.21	145.15					74	6166372	10696773	15868283		3305598	5764288	14443575		1.86543	1.8557	1.09864
12.5	74.14	126.65	143.15					75	5936914	10506431	15774093		3329248	5725744	14476027		1.78326	1.83495	1.08967
12.6667	80.34	126.7	144.2					76	6077660	10558148	15850153		3290909	5752702	14483384		1.8468	1.83534	1.09437
12.8333	72.68	122.76	142.68					77	6013811	10407147	15710309		3400926	5770609	14445237		1.76829	1.80347	1.08758
13	75.8	126.34	143.01					78	5929712	10542642	15833379		3293846	5753231	14538520		1.80024	1.83247	1.08906
13.1667	76.23	128.33	144.31					79	6316650	10690653	15875304		3500056	5783333	14499713		1.80473	1.84853	1.09487
13.3333	79.92	128.81	144.87					80	6150417	10526162	15706383		3338193	5682209	14312243		1.84244	1.85248	1.09741
13.5	81.41	128.91	146.53					81	5922690	10242953	15684437		3188067	5526917	14196197		1.85777	1.85329	1.10483
13.6667	82.13	131.82	145.9					82	5633209	10023013	15736187		3020249	5340348	14279734		1.86515	1.87685	1.10199
13.8333	76.08	125.3	144.38					83	5368217	9732236	15552347		2977075	5335658	14200773		1.80319	1.824	1.09518
14	75.07	129.84	141.43					84	5228238	9895627	15324887		2916196	5317971	14163984		1.79283	1.86079	1.08196
14.1667	76.69	131.86	131.74					85	5503693	10091046	14712813		3041696	5375823	14166529		1.80942	1.87712	1.03856
14.3333	72.39	120.8	77.98					86	6198023	10138861	11015012		3510993	5671689	13809930		1.76532	1.78763	0.797615
14.5	59.71	80.84	7.6					87	6838758	8022583	6223494		4181445	5479561	12906545		1.6355	1.46409	0.482197
14.6667	49.7	47.65	-4.39					88	6531844	5846396	5524944		4260812	4890793	12894326		1.533	1.19539	0.428479
14.8333	42.46	37.26	-7.61					89	5831369	5521967	5416889		3997222	4969209	13082680		1.45886	1.11124	0.41405
15	27.7	30.44	-11.87					90	5159348	5231580	5310031		3945378	4953796	13443958		1.30769	1.05607	0.394975
15.1667	20.77	18.6	-13.07					91	4669787	4695736	5197501		3775955	4890475	13342010		1.23672	0.96018	0.389559
15.3333	14.15	13.03	-14.31					92	4202502	4459228	5102442		3595211	4872788	13286475		1.16892	0.915129	0.384033
15.5	7.5	10.37	-15.02					93	3931227	4183351	5032358		3571161	4681791	13213242		1.10083	0.893536	0.380857
15.6667	3.86	5.29	-14.88					94	3643411	3948171	5011728		3425660	4631528	13137885		1.06356	0.852455	0.381471
15.8333	2.81	2.72	-18.2					95	3696046	3847219	4895469		3510519	4626267	13353948		1.05285	0.831603	0.366593
16	3.04	0.74	-18.55					96	3638564	3763943	4870532		3448378	4615038	13342493		1.05515	0.815582	0.365039
16.1667	-0.93	-2.59	-18.28					97	3396780	3654870	4864661		3348120	4634421	13283500		1.01453	0.788636	0.366218
16.3333	-1.41	-4.23	-19.22					98	3363744	3579523	4779193		3331728	4616597	13202133		1.00961	0.77536	0.362002
16.5	-1.12	-3.41	-19.09					99	3630657	3560544	4760820		3585588	4553322	13130193		1.01257	0.781966	0.362586
16.6667	-1.58	-2.27	-19.46					100	3391577	3461129	4720423		3365192	4374291	13077844		1.00784	0.791243	0.360948
16.8333	-1.83	-2.92	-19.45					101	3566842	3494887	4780560		3548056	4446548	13243871		1.00529	0.785978	0.360964
17	-1.85	-3.63	-18.12					102	3438663	3474310	4793270		3421049	4453105	13062616		1.00515	0.780199	0.366946
17.1667	0.35	-2.61	-18.09					103	3504466	3539143	4881014		3410070	4488455	13297524		1.02768	0.788499	0.367062
17.3333	-2.77	-1.56	-17.56					104	3454166	3498183	4882661		3469051	4389274	13215530		0.995709	0.796984	0.369464
17.5	-5.92	-4.18	-19.41					105	3490050	3335358	4808914		3622483	4299669	13315672		0.963441	0.775724	0.361147
17.6667	-1.05	-4.36	-19.81					106	3380335	3333056	4725295		3336084	4304612	13148380		1.01326	0.774299	0.359382
17.8333	-3.63	-5.32	-18.19					107	3564697	3496702	4860675		3612028	4561653	13257935		0.986896	0.766543	0.366624
18	-1.97	-7.18	-21.22					108	3580863	3407597	4694971		3566858	4534317	13297914		1.00393	0.751513	0.353061
								109	3403600	3352433	4884118		3383054	4416971	13412866		1.00607	0.758989	0.364137
								110	3514638	3438117	4751448		3563826	4397100	13048872		0.986198	0.781906	0.364127
								111	3306868	3294921	4776664		3361211	4429225	13208069		0.983832	0.743905	0.361647
