# Supplementary material for: A highly responsive pyruvate sensor reveals pathway-regulatory role of the mitochondrial pyruvate carrier MPC
Source: eLife. 2020 Mar 6;9:e53917. doi: 10.7554/eLife.53917 (PMC7077990; doi:10.7554/eLife.53917)
Supplement: Figure 2—source data 1. [file elife-53917-fig2-data1.xlsx]

## Sheet: 2B
Time (min)	mito-PyronicSF	mito-mCherry	ratio		Pulse	Time (min)		ALL 4 cells	Time (min)	mitoPyronicSF Cell 1	mitoPyronicSF Cell 2	mitoPyronicSF Cell 3	mitoPyronicSF Cell 4		mito-mCherry Cell 1	mito-mCherry Cell 2	mito-mCherry Cell 3	mito-mCherry Cell 4
0.05	121.13	99.96	141.2		start pyruvate	1			0.05	1.01898	1.00973	1.00348	1.01303		0.993511	0.99074	0.982367	1.03187
0.1	119.27	98.37	140.99		end pyruvate	2			0.1	0.99495	1.00294	1.00262	0.970484		1.00073	1.00674	0.998573	0.928611
0.15	119.03	98.55	140.52						0.15	0.992494	0.992597	0.955549	1.02042		0.977709	1.00033	0.99383	0.970091
0.2	119.57	98.82	140.75						0.2	0.995098	1.01925	1.0178	0.950816		0.991927	0.991391	0.997931	0.9716
0.25	120.73	99.71	141.03						0.25	0.990725	1.01363	1.03603	0.988741		1.01353	0.986261	1.01408	0.974664
0.3	119.88	99.48	140.42						0.3	0.996046	0.99141	0.992229	1.01569		0.988304	0.975606	1.0022	1.01306
0.35	121.15	99.35	141.83						0.35	1.00738	0.996795	0.996817	1.04492		1.00112	0.999354	0.958006	1.0156
0.4	118.91	99.98	138.96						0.4	1.00844	0.994983	0.965169	0.987735		1.00046	0.987031	1.02189	0.989953
0.45	119.91	100.63	139.3						0.45	0.993978	0.996385	1.00998	0.995913		0.997549	1.02036	0.990289	1.01714
0.5	120.1	102.53	137.66						0.5	1.01642	0.989313	1.02802	0.970213		1.02971	1.01334	1.01574	1.04224
0.55	120.32	102.61	137.76						0.55	0.985483	0.992969	0.992307	1.04204		1.00545	1.02886	1.02509	1.04517
0.6	120.35	98.83	141.54						0.6	1.0032	0.993739	0.998617	1.01824		0.998649	0.992169	0.975647	0.986764
0.65	120.54	99.68	140.91						0.65	1.00398	1.02426	1.00719	0.986268		1.01462	1.01485	1.00793	0.949686
0.7	121.3	101.49	139.81						0.7	1.0071	0.982374	1.00826	1.05432		1.02224	0.999101	1.02307	1.01523
0.75	121.09	100.83	140.29						0.75	1.01411	1.00469	1.00077	1.02408		1.00694	0.997314	0.984132	1.04479
0.8	121.59	101.79	139.81						0.8	1.01159	1.00945	1.02322	1.01952		1.01109	1.0115	1.02886	1.02008
0.85	119.57	99.76	139.83						0.85	1.01438	1.00165	1.00479	0.962035		1.01764	1.00464	0.972899	0.995287
0.9	122.83	100.52	142.26						0.9	0.989477	0.991732	1.05982	1.07201		0.986564	0.997581	1.01279	1.02406
0.95	121.85	100.81	141.05						0.95	1.02782	1.02456	1.00142	1.02034		0.997931	1.01491	1.01237	1.00705
1	117.68	95.86	141.89						1	0.983838	0.970429	1.01201	0.941117		0.9729	0.957445	0.966722	0.937508
1.05	121.17	97.91	143.34						1.05	1.00919	0.983138	1.00226	1.05209		0.982312	0.969043	0.993107	0.972098
1.1	120.11	96.65	143.58						1.1	0.998792	0.999574	1.01503	0.991023		0.959793	0.962931	0.977212	0.966234
1.15	128.19	101.23	146.89						1.15	1.04619	1.05566	1.08437	1.1415		0.983461	0.999161	0.990961	1.07567
1.2	125.57	98.62	147.07						1.2	1.07266	1.01705	1.05481	1.07842		0.993462	0.981774	0.999566	0.969843
1.25	130.15	99.56	150.61						1.25	1.08831	1.04163	1.15662	1.11955		0.984857	0.974441	1.01038	1.01254
1.3	129	98.75	150.36						1.3	1.07964	1.06192	1.07988	1.13867		0.988911	0.966559	0.983069	1.01163
1.35	132.41	99.97	152.41						1.35	1.08947	1.09012	1.11158	1.20532		0.990722	0.984339	1.00525	1.01835
1.4	133.18	99.32	153.92						1.4	1.11038	1.07025	1.11181	1.23471		1.00771	0.978882	0.958668	1.0274
1.45	134.74	100.66	154.05						1.45	1.11898	1.09733	1.17033	1.20306		1.01324	1.00071	0.967133	1.04521
1.5	132.84	96.35	157.11						1.5	1.12936	1.07554	1.13924	1.16951		0.968611	0.961776	0.96273	0.960977
1.55	134.12	98.53	155.85						1.55	1.15464	1.09739	1.1374	1.17524		1.01207	0.948394	0.96272	1.01803
1.6	133.53	98.14	155.68						1.6	1.13953	1.09636	1.11979	1.18559		1.0003	0.970123	0.955399	0.999642
1.65	133.82	98.61	155.41						1.65	1.14547	1.11502	1.11888	1.17342		0.997467	0.974272	0.968216	1.00456
1.7	133.9	98.48	155.64						1.7	1.13763	1.08933	1.10566	1.22344		1.00101	0.983315	0.94891	1.00608
1.75	132.19	95.96	156.88						1.75	1.12442	1.073	1.09681	1.19325		0.977058	0.944569	0.933897	0.983047
1.8	134.27	95.61	159.54						1.8	1.16055	1.1123	1.12128	1.17674		0.977675	0.950168	0.955118	0.94138
1.85	134.32	96.56	158.37						1.85	1.14635	1.11024	1.12852	1.18752		0.958711	0.958993	0.96259	0.982145
1.9	132.88	95.53	158.17						1.9	1.14099	1.0695	1.1621	1.14248		0.978435	0.938299	0.937818	0.96667
1.95	134.28	98.22	156.34						1.95	1.15804	1.11296	1.10326	1.19687		1.00325	0.965485	0.977011	0.983109
2	134.78	99.83	154.91						2	1.10846	1.08786	1.15349	1.24156		0.977499	0.978132	1.00491	1.03258
2.05	134.82	99.83	155.01						2.05	1.11048	1.08712	1.17801	1.21711		1.00333	0.987513	0.982226	1.01994
2.1	126.87	97.1	150.02						2.1	1.03872	1.02369	1.13599	1.07627		0.959351	0.949999	1.00096	0.973498
2.15	120.87	97.41	143.52						2.15	0.991737	0.970321	1.06422	1.00844		0.97696	0.959345	0.99746	0.962735
2.2	119.32	96.64	142.8						2.2	1.00715	0.987123	0.986868	0.991484		0.963356	0.993763	0.94894	0.959484
2.25	117.12	96.19	140.98						2.25	0.955271	0.956273	0.967995	1.00515		0.942468	0.941589	0.960654	1.00292
2.3	118.73	97.7	141.07						2.3	0.980836	0.988972	0.987719	0.99181		0.994566	0.970422	0.975497	0.967665
2.35	117.82	97.5	140.35						2.35	0.986977	0.992489	0.956207	0.977167		1.00098	0.964887	0.954717	0.979237
2.4	116.67	96.88	139.79						2.4	0.968402	0.975701	0.972466	0.950191		0.961309	0.967069	0.992175	0.954647
2.45	117.59	96.17	141.49						2.45	0.983818	0.98831	0.990739	0.940574		0.977713	0.965929	0.985837	0.917289
2.5	117.93	96.98	140.99						2.5	0.992794	0.975619	0.96064	0.98817		0.966503	0.977041	0.952049	0.983483
2.55	120.07	97.47	142.69						2.55	1.01086	0.983656	0.990565	1.01762		0.983742	0.975444	0.944407	0.995007
2.6	118.62	96.4	142.32						2.6	1.01593	0.992824	0.969466	0.966599		0.964602	0.987489	0.936474	0.967587
2.65	118.38	95.43	143.1						2.65	0.999254	0.976136	0.9865	0.973255		0.952674	0.956269	0.943294	0.965006
2.7	118.17	93.99	144.48						2.7	1.00892	0.973548	0.943993	1.00045		0.963232	0.947293	0.934519	0.914598
2.75	115.92	94.31	141.68						2.75	0.998713	0.971634	0.964821	0.901453		0.954856	0.946146	0.958628	0.912685
2.8	116.88	95.6	141.35						2.8	0.987861	0.949226	0.967085	0.970838		0.974004	0.957251	0.937919	0.954647
2.85	115.4	93.91	141.59						2.85	0.965027	0.970574	0.936328	0.944132		0.942644	0.948634	0.943946	0.921177
2.9	114.6	94.56	140.07						2.9	0.975334	0.976212	0.920804	0.911804		0.948348	0.945006	0.921471	0.967774
2.95	116.37	93.74	142.8						2.95	0.983533	0.943077	0.973415	0.954945		0.949729	0.923009	0.939433	0.937539
3	113.94	92.13	141.96						3	0.984245	0.929047	0.944438	0.899932		0.932494	0.93542	0.912375	0.904924
3.05	115.24	92.54	142.99						3.05	0.979117	0.959417	0.923553	0.947664		0.953191	0.930269	0.937357	0.880739
3.1	115.89	93.96	142.06						3.1	0.992518	0.964247	0.94951	0.929381		0.973843	0.943394	0.926044	0.915111
3.15	114.62	93.18	141.57						3.15	0.961927	0.954113	0.909965	0.95864		0.962323	0.945269	0.899298	0.920166
3.2	114.17	92.32	142						3.2	0.967292	0.954082	0.922778	0.922589		0.937262	0.940097	0.903921	0.911456
3.25	111.78	91.48	140.31						3.25	0.96122	0.923156	0.909868	0.87684		0.94544	0.926415	0.904222	0.883041

## Sheet: 2C
control							+UK-5099							ALL exps		Exp 1			Exp 2						Exp 3			Exp 4						Exp 5						Exp 6						Exp 7
Time (min)	DF%	SE		Time (min)	DF%		Time (min)	DF%	SE		Time (min)	DF%			Tiempo (min)	3P			3P						3P			3P						3P						3P						3P
0	0	0		0.00375	0.11532		0	0	0		0.00375	0.035343			0.1	1.0135	0.99405		1.0082	1.02995	0.9911	1.01825	0.99935		1.0142	0.9718		1.0006	0.97245	0.97475	0.99815	0.9952		0.965295	0.979487	1.00105	1.0085	0.98359		1.00952	1.00723	1.03904	1.00942	1.02333		1.01402	0.948331	1.00504	0.926017
0.1	3.3	0.50393		0.0075781	0.23175		0.1	0.51872	0.51574		0.0075781	0.071275			0.2	0.99215	1.00605		1.0011	0.9972	1.0011	1.03705	1.03115		0.98565	1.0267		1.01235	0.99805	1.0004	0.9957	0.99255		1.04218	1.00412	1.00842	1.02187	0.995372		0.971622	1.00779	0.988615	0.973462	0.967877		1.03103	0.991586	1.00913	0.989471
0.2	4.79	0.71552		0.0114	0.3469		0.2	1.91	0.64368		0.0114	0.10706			0.3	0.99445	1.00615		1.0056	1.006	0.9993	0.9831	0.97725		0.99095	1.00225		0.9916	1.0034	1.00365	0.99245	1.04325		1.00418	1.00898	1.00699	0.989984	1.02284		0.999996	1.01121	0.989914	1.00963	1.01678		0.996802	1.02517	1.02243	1.02198
0.3	5.9	0.80076		0.0152	0.46077		0.3	2.44	0.81293		0.0152	0.1427			0.4	0.99425	0.99225		0.98415	0.96865	1.0019	0.9626	0.9932		1.005	1.00485		1.0019	1.02275	1.01055	0.99885	0.99545		0.988345	1.00742	0.983536	0.979647	0.998201		1.02838	0.981001	1.02147	1.01691	1.01534		0.972166	0.983243	0.968448	0.988551
0.4	6.93	0.91313		0.0191	0.57338		0.4	3.27	0.95575		0.0191	0.17819			0.5	1.002	1.0015		0.98165	0.98065	1.00215	0.98025	0.92815		0.98815	0.951		1.0205	1.00935	1.01735	1.00395	1.02275		1.0089	0.9825	0.970617	1.00024	1.01804		1.00879	0.992006	1.01217	0.946287	0.987722		1.00752	0.932732	1.0372	0.980156
0.5	8.17	1.03		0.0229	0.68475		0.5	3.57	0.90841		0.0229	0.21353			0.6	1.03605	1.07335		1.01675	1.0688	1.05545	1.0636	0.9967		0.9766	1.00545		1.0009	1.0345	0.99985	1.06975	0.97645		1.11087	1.06466	1.04444	1.01729	1.07381		1.07557	1.09607	1.06295	1.05252	1.05554		1.17466	1.05695	1.08997	1.16874
0.6	8.88	1.16		0.0267	0.79488		0.6	3.91	1.03		0.0267	0.24873			0.7	1.06975	1.1411		1.08785	1.1145	1.1493	1.13825	1.09795		0.9683	0.99665		1.05845	1.065	1.0316	1.21395	1.06135		1.1476	1.19274	1.04885	1.00751	1.13458		1.14761	1.156	1.11875	1.17199	1.19812		1.28093	1.10191	1.15519	1.21561
0.7	9.41	1.34		0.0305	0.90379		0.7	4.81	1.2		0.0305	0.28379			0.8	1.1045	1.19025		1.16875	1.14425	1.15865	1.18725	1.08885		0.96885	0.94205		1.07225	1.0907	1.05705	1.28305	1.0693		1.25486	1.24018	1.14712	1.07064	1.1403		1.15902	1.19345	1.17176	1.15312	1.19466		1.34403	1.10322	1.16051	1.29045
				0.0344	1.01						0.0344	0.3187			0.9	1.139	1.2281		1.24175	1.16575	1.18045	1.185	1.15225		0.9723	0.9929		1.10095	1.11515	1.0728	1.32005	1.1074		1.23792	1.35103	1.14877	1.12568	1.24018		1.20887	1.22431	1.17392	1.23156	1.30608		1.404	1.10661	1.14486	1.32931
				0.0382	1.12						0.0382	0.35346			1	1.1569	1.23245		1.2867	1.1821	1.1426	1.1672	1.2045		0.9917	1.01295		1.10795	1.1228	1.0792	1.30775	1.1225		1.35816	1.34398	1.18384	1.19709	1.30624		1.24374	1.26308	1.1952	1.26342	1.33505		1.43164	1.11462	1.16565	1.28679
				0.042	1.22						0.042	0.38809			1.1	1.1641	1.238		1.3474	1.14575	1.1422	1.1394	1.1873		1.01825	0.9995		1.14525	1.14425	1.1128	1.3272	1.1418		1.3593	1.47068	1.2122	1.1453	1.27816		1.22981	1.26685	1.19165	1.29407	1.41408		1.39772	1.08124	1.1346	1.25604
				0.0459	1.33						0.0459	0.42257			1.2	1.185	1.25845		1.36745	1.1304	1.1299	1.1262	1.18965		1.03345	1.0733		1.14745	1.14465	1.1256	1.3115	1.10515		1.38032	1.40674	1.24027	1.1592	1.30042		1.28741	1.29395	1.27728	1.28063	1.45635		1.45703	1.11382	1.18898	1.37434
				0.0497	1.43						0.0497	0.45691			1.3	1.18535	1.27355		1.41105	1.12475	1.1436	1.1327	1.2646		1.04685	1.0588		1.17535	1.1874	1.1285	1.33165	1.1945		1.40602	1.46379	1.22322	1.193	1.33091		1.28014	1.26268	1.27403	1.3269	1.47234		1.48193	1.13117	1.1978	1.3137
				0.0535	1.53						0.0535	0.49111			1.4	1.20585	1.2765		1.46235	1.1396	1.10905	1.0768	1.27265		1.0428	1.06475		1.2026	1.20515	1.1627	1.3781	1.22205		1.37789	1.42716	1.24717	1.17192	1.34615		1.28486	1.24982	1.26325	1.32542	1.47337		1.46466	1.16629	1.17345	1.34688
				0.0573	1.63						0.0573	0.52517
				0.0612	1.73						0.0612	0.55909			Tiempo (min)	3P + UK			3P + UK						3P + UK			3P + UK						3P + UK						3P + UK						3P + UK
				0.065	1.83						0.065	0.59287			0.1	0.9905	0.99495		1.00195	1.02115	1.0299	1.01765	1.0222		0.9942	0.97635		1.02625	1.0192	1.01525	1.01385	1.01345		1.0098	1.00606	1.00595	1.00273	0.978643		0.957194	0.942881	0.947635	0.970946	1.02612		0.949977	0.965233	1.01572	0.960266
				0.0688	1.93						0.0688	0.62651			0.2	1.00945	0.9964		1.0125	0.99485	1.00035	1.00675	1.0069		0.99515	1.01415		0.98725	0.99105	1.00275	0.99115	1.01375		0.999573	1.00315	0.993547	0.980611	1.02465		1.00059	1.00672	0.988366	0.994043	0.975869		0.999527	1.01576	1.00566	0.95145
				0.0727	2.03						0.0727	0.66001			0.3	1.00175	1.00155		1.00035	0.98815	0.9785	0.98235	0.98105		1.01995	1.01485		0.9902	1.00175	0.98955	0.98945	0.99895		0.996167	1.0062	1.01349	0.992576	1.01172		1.0055	0.984659	1.00359	1.01909	1.0198		0.992503	0.987947	1.02582	0.993689
				0.0765	2.12						0.0765	0.69337			0.4	1.00155	1.0004		0.97355	0.9817	0.98715	0.9738	0.98515		0.99835	0.99555		0.99525	0.984	0.9861	0.99275	0.98765		0.99446	0.984589	0.987018	1.02408	0.984986		0.993913	1.00862	1.00804	0.986864	1.00433		1.00797	0.996295	0.96852	1.05486
				0.0803	2.21						0.0803	0.7266			0.5	1.0017	1.0094		0.98595	0.97745	0.96925	0.9494	0.9745		0.9699	0.9697		0.9713	0.99395	0.9701	1.00025	0.94875		1.00008	1.03701	1.03225	0.99952	0.994008		1.01277	0.965666	1.01238	0.981453	1.00279		0.971508	0.97305	1.04187	1.02017
				0.0841	2.31						0.0841	0.75969			0.6	1.01185	1.0713		1.01335	1.0291	1.05345	1.047	1.0371		0.978	0.9977		0.9892	1.0256	1.00515	1.0752	0.9858		1.10532	1.11965	1.10196	1.00899	1.08263		1.02461	1.03153	1.01827	0.984476	1.01583		1.12789	1.01444	1.04681	1.09861
				0.088	2.4						0.088	0.79265			0.7	1.03175	1.08815		0.9983	1.023	1.06815	1.05865	1.0563		0.9744	0.9886		1.0279	1.04375	1.00595	1.1734	0.9547		1.19043	1.17821	1.14039	1.09323	1.17573		1.0483	1.03909	1.0775	1.04335	1.07203		1.17381	1.0819	1.0828	1.24558
				0.0918	2.49						0.0918	0.82547			0.8	1.0367	1.11215		0.9944	1.0647	1.0523	1.10315	1.0736		0.96775	0.9831		1.02285	1.0583	1.0196	1.2212	0.99665		1.24465	1.27181	1.1821	1.11609	1.16359		1.10725	1.11079	1.11218	1.06304	1.13558		1.29618	1.08715	1.11274	1.28576
				0.0956	2.58						0.0956	0.85815			0.9	1.0445	1.1225		0.9909	1.02195	1.02075	1.06425	1.06505		0.98225	0.937		1.03225	1.06615	1.02555	1.23285	1.034		1.28769	1.28303	1.14204	1.11531	1.22028		1.12107	1.12194	1.11998	1.1452	1.21053		1.27341	1.06189	1.10042	1.29086
				0.0995	2.67						0.0995	0.8907			1	1.06825	1.1501		0.986	1.02075	1.0536	1.02065	1.04745		1.00635	1.0194		1.0504	1.05955	1.05315	1.25375	0.9919		1.30054	1.28862	1.16542	1.14946	1.24454		1.15161	1.17265	1.12204	1.18706	1.25319		1.28756	1.09964	1.12813	1.35977
				0.1033	2.76						0.1033	0.92312			1.1	1.06015	1.1435		0.9985	1.0439	1.00755	1.02735	1.09175		0.9892	0.9428		1.0451	1.09515	1.06845	1.2632	1.0282		1.33097	1.36876	1.1996	1.11391	1.22217		1.15842	1.19217	1.13188	1.24082	1.31078		1.28897	1.05388	1.10868	1.34542
				0.1071	2.85						0.1071	0.9554			1.2	1.0581	1.14815		1.0171	1.0143	1.0034	1.0014	1.0823		0.95675	0.998		1.0556	1.09025	1.05295	1.2753	1.05825		1.33086	1.34827	1.21653	1.13312	1.26893		1.20394	1.17839	1.18042	1.27735	1.34668		1.35142	1.14656	1.10674	1.29308
				0.1109	2.93						0.1109	0.98755			1.3	1.06885	1.15735		1.0127	1.03765	0.99735	0.9958	1.04435		0.9689	0.9831		1.0668	1.1251	1.0472	1.30525	1.07295		1.34672	1.35415	1.19164	1.12755	1.20759		1.13671	1.14116	1.16305	1.25019	1.33295		1.31628	1.07941	1.08656	1.29301
				0.1148	3.02						0.1148	1.02			1.4	1.0818	1.1786		1.0295	1.0306	0.99365	0.9521	1.0852		0.97075	0.9406		1.0944	1.1275	1.08085	1.29815	1.0657		1.34518	1.35864	1.19656	1.14604	1.31496		1.17012	1.17543	1.1372	1.22198	1.27143		1.34395	1.13195	1.09924	1.17096
				0.1186	3.1						0.1186	1.05
				0.1224	3.19						0.1224	1.08
				0.1262	3.27						0.1262	1.11
				0.1301	3.35						0.1301	1.15
				0.1339	3.43						0.1339	1.18
				0.1377	3.51						0.1377	1.21
				0.1416	3.59						0.1416	1.24
				0.1454	3.67						0.1454	1.27
				0.1492	3.74						0.1492	1.3
				0.153	3.82						0.153	1.33
				0.1569	3.9						0.1569	1.36
				0.1607	3.97						0.1607	1.39
				0.1645	4.04						0.1645	1.42
				0.1684	4.12						0.1684	1.45
				0.1722	4.19						0.1722	1.48
				0.176	4.26						0.176	1.51
				0.1798	4.33						0.1798	1.54
				0.1837	4.4						0.1837	1.57
				0.1875	4.47						0.1875	1.6
				0.1913	4.54						0.1913	1.63
				0.1952	4.61						0.1952	1.66
				0.199	4.67						0.199	1.69
				0.2028	4.74						0.2028	1.72
				0.2066	4.8						0.2066	1.75
				0.2105	4.87						0.2105	1.78
				0.2143	4.93						0.2143	1.81
				0.2181	5						0.2181	1.84
				0.222	5.06						0.222	1.86
				0.2258	5.12						0.2258	1.89
				0.2296	5.18						0.2296	1.92
				0.2334	5.24						0.2334	1.95
				0.2373	5.3						0.2373	1.98
				0.2411	5.36						0.2411	2.01
				0.2449	5.42						0.2449	2.03
				0.2487	5.48						0.2487	2.06
				0.2526	5.53						0.2526	2.09
				0.2564	5.59						0.2564	2.12
				0.2602	5.65						0.2602	2.14
				0.2641	5.7						0.2641	2.17
				0.2679	5.76						0.2679	2.2
				0.2717	5.81						0.2717	2.22
				0.2755	5.86						0.2755	2.25
				0.2794	5.92						0.2794	2.28
				0.2832	5.97						0.2832	2.31
				0.287	6.02						0.287	2.33
				0.2909	6.07						0.2909	2.36
				0.2947	6.12						0.2947	2.38
				0.2985	6.17						0.2985	2.41
				0.3023	6.22						0.3023	2.44
				0.3062	6.27						0.3062	2.46
				0.31	6.32						0.31	2.49
				0.3138	6.37						0.3138	2.52
				0.3177	6.41						0.3177	2.54
				0.3215	6.46						0.3215	2.57
				0.3253	6.51						0.3253	2.59
				0.3291	6.55						0.3291	2.62
				0.333	6.6						0.333	2.64
				0.3368	6.64						0.3368	2.67
				0.3406	6.69						0.3406	2.69
				0.3445	6.73						0.3445	2.72
				0.3483	6.77						0.3483	2.74
				0.3521	6.82						0.3521	2.77
				0.3559	6.86						0.3559	2.79
				0.3598	6.9						0.3598	2.82
				0.3636	6.94						0.3636	2.84
				0.3674	6.98						0.3674	2.87
				0.3713	7.02						0.3713	2.89
				0.3751	7.06						0.3751	2.91
				0.3789	7.1						0.3789	2.94
				0.3827	7.14						0.3827	2.96
				0.3866	7.18						0.3866	2.99
				0.3904	7.22						0.3904	3.01
				0.3942	7.26						0.3942	3.03
				0.398	7.29						0.398	3.06
				0.4019	7.33						0.4019	3.08
				0.4057	7.37						0.4057	3.1
				0.4095	7.4						0.4095	3.13
				0.4134	7.44						0.4134	3.15
				0.4172	7.47						0.4172	3.17
				0.421	7.51						0.421	3.2
				0.4248	7.54						0.4248	3.22
				0.4287	7.58						0.4287	3.24
				0.4325	7.61						0.4325	3.27
				0.4363	7.65						0.4363	3.29
				0.4402	7.68						0.4402	3.31
				0.444	7.71						0.444	3.33
				0.4478	7.74						0.4478	3.36
				0.4516	7.78						0.4516	3.38
				0.4555	7.81						0.4555	3.4
				0.4593	7.84						0.4593	3.42
				0.4631	7.87						0.4631	3.44
				0.467	7.9						0.467	3.47
				0.4708	7.93						0.4708	3.49
				0.4746	7.96						0.4746	3.51
				0.4784	7.99						0.4784	3.53
				0.4823	8.02						0.4823	3.55
				0.4861	8.05						0.4861	3.57
				0.4899	8.08						0.4899	3.6
				0.4938	8.11						0.4938	3.62
				0.4976	8.13						0.4976	3.64
				0.5014	8.16						0.5014	3.66
				0.5052	8.19						0.5052	3.68
				0.5091	8.22						0.5091	3.7
				0.5129	8.24						0.5129	3.72
				0.5167	8.27						0.5167	3.74
				0.5205	8.3						0.5205	3.76
				0.5244	8.32						0.5244	3.78
				0.5282	8.35						0.5282	3.81
				0.532	8.37						0.532	3.83
				0.5359	8.4						0.5359	3.85
				0.5397	8.42						0.5397	3.87
				0.5435	8.45						0.5435	3.89
				0.5473	8.47						0.5473	3.91
				0.5512	8.5						0.5512	3.93
				0.555	8.52						0.555	3.95
				0.5588	8.54						0.5588	3.97
				0.5627	8.57						0.5627	3.99
				0.5665	8.59						0.5665	4.01
				0.5703	8.61						0.5703	4.03
				0.5741	8.63						0.5741	4.04
				0.578	8.66						0.578	4.06
				0.5818	8.68						0.5818	4.08
				0.5856	8.7						0.5856	4.1
				0.5895	8.72						0.5895	4.12
				0.5933	8.74						0.5933	4.14
				0.5971	8.76						0.5971	4.16
				0.6009	8.78						0.6009	4.18
				0.6048	8.8						0.6048	4.2
				0.6086	8.82						0.6086	4.22
				0.6124	8.84						0.6124	4.24
				0.6162	8.86						0.6162	4.25
				0.6201	8.88						0.6201	4.27
				0.6239	8.9						0.6239	4.29
				0.6277	8.92						0.6277	4.31
				0.6316	8.94						0.6316	4.33
				0.6354	8.96						0.6354	4.35
				0.6392	8.98						0.6392	4.36
				0.643	9						0.643	4.38
				0.6469	9.02						0.6469	4.4
				0.6507	9.03						0.6507	4.42
				0.6545	9.05						0.6545	4.44
				0.6584	9.07						0.6584	4.45
				0.6622	9.09						0.6622	4.47
				0.666	9.1						0.666	4.49
				0.6698	9.12						0.6698	4.51
				0.6737	9.14						0.6737	4.53
				0.6775	9.15						0.6775	4.54
				0.6813	9.17						0.6813	4.56
				0.6852	9.19						0.6852	4.58
				0.689	9.2						0.689	4.59
				0.6928	9.22						0.6928	4.61
				0.6966	9.23						0.6966	4.63
				0.7005	9.25						0.7005	4.65
				0.7043	9.27						0.7043	4.66
				0.7081	9.28						0.7081	4.68
				0.712	9.3						0.712	4.7
				0.7158	9.31						0.7158	4.71
				0.7196	9.33						0.7196	4.73
				0.7234	9.34						0.7234	4.75
				0.7273	9.35						0.7273	4.76
				0.7311	9.37						0.7311	4.78
				0.7349	9.38						0.7349	4.8
				0.7387	9.4						0.7387	4.81
				0.7426	9.41						0.7426	4.83
				0.7464	9.42						0.7464	4.85
				0.7502	9.44						0.7502	4.86
				0.7541	9.45						0.7541	4.88
				0.7579	9.46						0.7579	4.89
				0.7617	9.48						0.7617	4.91
				0.7655	9.49						0.7655	4.93
				0.7694	9.5						0.7694	4.94
				0.7732	9.51						0.7732	4.96
				0.777	9.53						0.777	4.97
				0.7809	9.54						0.7809	4.99
				0.7847	9.55						0.7847	5
				0.7885	9.56						0.7885	5.02
				0.7923	9.58						0.7923	5.04
				0.7962	9.59						0.7962	5.05
				0.8	9.6						0.8	5.07
[truncated: 13 more columns]

## Sheet: 2D
control							+Rosiglitazone							ALL EXPS		Exp 1							Exp 2						Exp 3							Exp 4							Exp 5
Time (min)	DF%	SE		Time (min)	DF%		Time (min)	DF%	SE		Time (min)	DF%			Time (min)	3P+Ros							3P+Ros						3P+Ros							3P+Ros							3P+Ros
0	0	0		0.004375	0.34255		0	0	0		0.004375	0.11487			0.1	1.12058	1.11432	1.04731	1.10643	1.11088	1.07144		1.19819	1.21366	1.10602	1.14223	1.13442		1.15654	1.14171	1.176	1.10785	1.10041	1.16739		1.1731	1.17893	1.12422	1.13966	1.14363	1.17665		1.1424	1.04457	1.07898	1.08204	1.09363	1.10331
0.1	6.46	0.59956		0.0089844	0.69649		0.1	1.81	0.45931		0.0089844	0.23496			0.2	1.13226	1.13619	1.09879	1.17882	1.13194	1.12511		1.19029	1.20725	1.11254	1.11721	1.13631		1.13383	1.16752	1.15292	1.13816	1.16299	1.17421		1.17452	1.15964	1.11459	1.18999	1.17335	1.17237		1.16202	1.1588	1.11533	1.15163	1.11314	1.11822
0.2	10.89	0.79476		0.0136	1.04		0.2	4.69	0.61082		0.0136	0.35408			0.3	1.12902	1.13069	1.11469	1.11445	1.09958	1.08587		1.21243	1.19618	1.08608	1.15292	1.12508		1.14292	1.1529	1.15069	1.10139	1.14616	1.17517		1.1221	1.12486	1.10904	1.15822	1.13831	1.15103		1.16438	1.1386	1.08716	1.13659	1.11357	1.12784
0.3	12.87	0.98712		0.0182	1.38		0.3	6.02	0.72948		0.0182	0.47226			0.4	1.10559	1.1141	1.08858	1.10047	1.11982	1.12315		1.17268	1.15483	1.04127	1.11119	1.12478		1.10981	1.13199	1.11786	1.14898	1.20645	1.18925		1.14686	1.1363	1.12852	1.09751	1.12153	1.12451		1.1637	1.11677	1.08253	1.13847	1.15582	1.15936
0.4	15.41	1.09		0.0228	1.72		0.4	7.69	0.7757		0.0228	0.58949			0.5	1.11331	1.12715	1.11393	1.10119	1.10704	1.10299		1.17697	1.15949	1.05294	1.10042	1.1665		1.10105	1.14822	1.13224	1.04516	1.14531	1.17686		1.15202	1.17368	1.14581	1.11654	1.11376	1.15806		1.27259	1.18154	1.17177	1.19675	1.15061	1.23193
0.5	16.49	1.16		0.0274	2.04		0.5	9.46	0.89596		0.0274	0.70579			0.6	1.13852	1.11667	1.08572	1.13947	1.14058	1.12815		1.21869	1.17839	1.07306	1.12391	1.19305		1.15582	1.20137	1.18718	1.07782	1.19792	1.16813		1.17066	1.23467	1.15619	1.15955	1.12531	1.24119		1.3286	1.20125	1.21564	1.33654	1.16381	1.28175
0.6	15.7	1.02		0.032	2.36		0.6	9.53	0.76621		0.032	0.82116			0.7	1.15386	1.14617	1.11041	1.12663	1.06345	1.14111		1.18209	1.18565	1.07809	1.1576	1.19013		1.15006	1.1897	1.19797	1.09538	1.1767	1.17779		1.19674	1.25996	1.18183	1.16485	1.19041	1.29464		1.41662	1.28413	1.19991	1.31126	1.21753	1.33906
0.7	17.43	1.27		0.0366	2.68		0.7	10.36	0.79651		0.0366	0.93561			0.8	1.15847	1.12323	1.08133	1.13479	1.11956	1.13144		1.24535	1.19776	1.09546	1.15461	1.20751		1.15976	1.2163	1.17971	1.11501	1.18763	1.18225		1.25762	1.29949	1.27715	1.22568	1.27222	1.33309		1.42515	1.21712	1.22771	1.29319	1.22071	1.37745
0.8	17.51	1.25		0.0412	2.99		0.8	11.27	0.90322		0.0412	1.05			0.9	1.15268	1.15003	1.1116	1.14127	1.12421	1.16304		1.25501	1.20927	1.07822	1.16552	1.18936		1.14334	1.1806	1.23905	1.11101	1.17054	1.19331		1.30391	1.33874	1.26108	1.31301	1.34988	1.36148		1.44034	1.22063	1.18659	1.34328	1.2256	1.4055
0.9	18.6	1.29		0.0459	3.29		0.9	12.19	0.90574		0.0459	1.16			1	1.14271	1.19641	1.14115	1.19882	1.15539	1.20626		1.25905	1.26618	1.10597	1.11315	1.20273		1.19323	1.24972	1.23891	1.13859	1.24046	1.23203									1.43775	1.19522	1.17972	1.35966	1.22154	1.37978
				0.0505	3.58						0.0505	1.27			1.1	1.2132	1.19005	1.12695	1.16579	1.17054	1.16899		1.29218	1.23669	1.09271	1.17766	1.22114		1.16218	1.24505	1.23267	1.16642	1.22534	1.22035									1.47949	1.22329	1.20586	1.34618	1.26543	1.37433
				0.0551	3.87						0.0551	1.38			1.2	1.23586	1.20404	1.13648	1.2004	1.19909	1.19661		1.28675	1.22149	1.11175	1.1664	1.23626		1.1739	1.24363	1.22543	1.13704	1.20664	1.20485									1.51718	1.1889	1.19892	1.39398	1.2619	1.40043
				0.0597	4.16						0.0597	1.49			1.3	1.24983	1.2224	1.19393	1.23545	1.20649	1.20437		1.32289	1.26686	1.13039	1.18538	1.26054		1.17302	1.21583	1.23374	1.16645	1.22594	1.24266									1.43632	1.18284	1.17769	1.38069	1.26704	1.40665
				0.0643	4.44						0.0643	1.6
				0.0689	4.71						0.0689	1.71			Time (min)	3P							3P						3P							3P							3P
				0.0735	4.98						0.0735	1.82			0.1	1.01372	0.968	0.949439	1.02621	1.0036	0.954911		0.996484	1.04121	0.990362	0.986217	0.973832		0.98219	0.988427	1.02392	0.985707	1.02312	0.981082		0.978418	1.0559	1.00596	0.997554	0.97626	1.02435		1.09516	1.03443	1.02322	1.02755	0.984947	0.987555
				0.0781	5.24						0.0781	1.93			0.2	1.01588	0.970202	1.00277	1.08114	1.03276	1.0045		1.02272	1.02296	0.996804	0.994344	0.97178		0.997749	1.01452	1.01999	0.987284	0.953567	0.999354		1.00616	1.06065	1.00753	1.03302	1.02341	1.03376		1.06097	1.06975	1.03649	1.06022	0.982853	0.979011
				0.0827	5.5						0.0827	2.03			0.3	1.04249	1.0033	1.01019	1.08276	1.04928	1.00603		1.02723	1.0357	0.967282	0.954889	0.968978		0.991393	1.00818	1.07606	1.03383	1.05279	0.985398		1.0343	1.02953	1.03815	1.04052	1.0226	1.01492		1.03579	1.02558	0.984552	1.02644	0.979172	0.999429
				0.0873	5.75						0.0873	2.14			0.4	0.980912	0.973823	0.96689	1.02157	1.022	1.03205		0.983386	0.993723	0.986254	1.04147	1.01313		0.984393	1.04956	1.02543	1.02833	0.998838	0.981437		1.01519	1.0407	1.03131	0.969704	0.994828	1.03011		1.07054	0.972587	1.04858	1.0187	1.02603	1.08767
				0.092	6						0.092	2.24			0.5	1.03325	0.989479	1.00363	1.05659	1.04773	1.05973		1.04196	1.04251	1.02242	1.02185	1.0654		1.02324	1.06466	1.02991	1.02612	1.01114	0.967022		1.08034	1.14678	1.08042	1.07582	1.06011	1.14348		1.2386	1.10356	1.09991	1.21032	1.10121	1.23066
				0.0966	6.24						0.0966	2.34			0.6	1.06447	1.05968	1.04038	1.12879	1.06124	1.05444		1.08449	1.09613	1.03526	1.04152	1.08476		1.04643	1.11036	1.06131	1.0667	1.02213	1.02845		1.15093	1.20848	1.13497	1.19531	1.19737	1.21217		1.34605	1.151	1.16289	1.25779	1.07421	1.29926
				0.1012	6.48						0.1012	2.45			0.7	1.08031	1.08847	1.07128	1.09808	1.06403	1.07744		1.12896	1.11628	1.05486	1.0311	1.10697		1.02003	1.0741	1.08847	1.05493	1.04167	1.04794		1.16215	1.24702	1.18803	1.17578	1.19406	1.28371		1.41021	1.15216	1.16935	1.33333	1.111	1.39034
				0.1058	6.71						0.1058	2.55			0.8	1.13094	1.06788	1.10263	1.18681	1.07742	1.16029		1.14982	1.14367	1.04025	1.02879	1.11358		1.04369	1.13939	1.06548	1.12262	1.09469	1.08077		1.21068	1.27792	1.18962	1.25339	1.30171	1.32662		1.47115	1.15573	1.1574	1.37127	1.10457	1.42152
				0.1104	6.94						0.1104	2.65			0.9	1.12926	1.11319	1.07081	1.21816	1.14077	1.1211		1.18492	1.15045	1.06061	1.04184	1.11669		1.06268	1.14792	1.08942	1.10511	1.05321	1.05819		1.24489	1.3177	1.20958	1.28529	1.33001	1.34804		1.50315	1.16356	1.17872	1.32796	1.07742	1.41708
				0.115	7.16						0.115	2.75			1	1.14237	1.12965	1.10593	1.19874	1.1031	1.15163		1.15645	1.14323	1.06882	1.08137	1.13037		1.06958	1.14973	1.12067	1.13761	1.16219	1.07796									1.46968	1.12818	1.15056	1.29632	1.11774	1.43693
				0.1196	7.38						0.1196	2.85			1.1	1.16235	1.17053	1.10555	1.30376	1.14101	1.2103		1.18671	1.1819	1.05304	1.1003	1.11114		1.0449	1.13265	1.09033	1.09437	1.13715	1.10639									1.52996	1.16257	1.2028	1.41512	1.16182	1.51016
				0.1242	7.59						0.1242	2.94			1.2	1.17093	1.15726	1.18628	1.26869	1.15285	1.20521		1.20007	1.19149	1.08989	1.06752	1.13608		1.05088	1.11055	1.08134	1.10523	1.09844	1.08817									1.55529	1.18089	1.21274	1.35384	1.09794	1.47797
				0.1288	7.8						0.1288	3.04			1.3	1.1781	1.16914	1.15872	1.2306	1.20515	1.21115		1.2325	1.24012	1.08819	1.08229	1.14709		1.05529	1.1154	1.10856	1.13284	1.08024	1.09014									1.53856	1.21775	1.18871	1.38723	1.12027	1.48469
				0.1334	8.01						0.1334	3.14
				0.138	8.21						0.138	3.23
				0.1427	8.41						0.1427	3.33
				0.1473	8.61						0.1473	3.42
				0.1519	8.8						0.1519	3.52
				0.1565	8.98						0.1565	3.61
				0.1611	9.17						0.1611	3.7
				0.1657	9.35						0.1657	3.79
				0.1703	9.52						0.1703	3.89
				0.1749	9.69						0.1749	3.98
				0.1795	9.86						0.1795	4.06
				0.1841	10.03						0.1841	4.15
				0.1887	10.19						0.1887	4.24
				0.1934	10.35						0.1934	4.33
				0.198	10.51						0.198	4.41
				0.2026	10.66						0.2026	4.5
				0.2072	10.81						0.2072	4.59
				0.2118	10.96						0.2118	4.67
				0.2164	11.1						0.2164	4.75
				0.221	11.24						0.221	4.84
				0.2256	11.38						0.2256	4.92
				0.2302	11.52						0.2302	5
				0.2348	11.65						0.2348	5.08
				0.2395	11.78						0.2395	5.16
				0.2441	11.91						0.2441	5.24
				0.2487	12.03						0.2487	5.32
				0.2533	12.16						0.2533	5.4
				0.2579	12.28						0.2579	5.48
				0.2625	12.4						0.2625	5.56
				0.2671	12.51						0.2671	5.63
				0.2717	12.63						0.2717	5.71
				0.2763	12.74						0.2763	5.78
				0.2809	12.85						0.2809	5.86
				0.2855	12.95						0.2855	5.93
				0.2902	13.06						0.2902	6.01
				0.2948	13.16						0.2948	6.08
				0.2994	13.26						0.2994	6.15
				0.304	13.36						0.304	6.22
				0.3086	13.46						0.3086	6.3
				0.3132	13.55						0.3132	6.37
				0.3178	13.64						0.3178	6.44
				0.3224	13.73						0.3224	6.51
				0.327	13.82						0.327	6.57
				0.3316	13.91						0.3316	6.64
				0.3363	14						0.3363	6.71
				0.3409	14.08						0.3409	6.78
				0.3455	14.16						0.3455	6.85
				0.3501	14.24						0.3501	6.91
				0.3547	14.32						0.3547	6.98
				0.3593	14.4						0.3593	7.04
				0.3639	14.48						0.3639	7.11
				0.3685	14.55						0.3685	7.17
				0.3731	14.63						0.3731	7.24
				0.3777	14.7						0.3777	7.3
				0.3823	14.77						0.3823	7.36
				0.387	14.84						0.387	7.42
				0.3916	14.9						0.3916	7.49
				0.3962	14.97						0.3962	7.55
				0.4008	15.03						0.4008	7.61
				0.4054	15.1						0.4054	7.67
				0.41	15.16						0.41	7.73
				0.4146	15.22						0.4146	7.79
				0.4192	15.28						0.4192	7.85
				0.4238	15.34						0.4238	7.91
				0.4284	15.4						0.4284	7.96
				0.433	15.45						0.433	8.02
				0.4377	15.51						0.4377	8.08
				0.4423	15.56						0.4423	8.13
				0.4469	15.62						0.4469	8.19
				0.4515	15.67						0.4515	8.25
				0.4561	15.72						0.4561	8.3
				0.4607	15.77						0.4607	8.36
				0.4653	15.82						0.4653	8.41
				0.4699	15.87						0.4699	8.46
				0.4745	15.91						0.4745	8.52
				0.4791	15.96						0.4791	8.57
				0.4838	16.01						0.4838	8.62
				0.4884	16.05						0.4884	8.68
				0.493	16.09						0.493	8.73
				0.4976	16.14						0.4976	8.78
				0.5022	16.18						0.5022	8.83
				0.5068	16.22						0.5068	8.88
				0.5114	16.26						0.5114	8.93
				0.516	16.3						0.516	8.98
				0.5206	16.34						0.5206	9.03
				0.5252	16.38						0.5252	9.08
				0.5298	16.41						0.5298	9.13
				0.5345	16.45						0.5345	9.17
				0.5391	16.48						0.5391	9.22
				0.5437	16.52						0.5437	9.27
				0.5483	16.55						0.5483	9.32
				0.5529	16.59						0.5529	9.36
				0.5575	16.62						0.5575	9.41
				0.5621	16.65						0.5621	9.46
				0.5667	16.68						0.5667	9.5
				0.5713	16.72						0.5713	9.55
				0.5759	16.75						0.5759	9.59
				0.5805	16.78						0.5805	9.64
				0.5852	16.8						0.5852	9.68
				0.5898	16.83						0.5898	9.72
				0.5944	16.86						0.5944	9.77
				0.599	16.89						0.599	9.81
				0.6036	16.92						0.6036	9.85
				0.6082	16.94						0.6082	9.9
				0.6128	16.97						0.6128	9.94
				0.6174	16.99						0.6174	9.98
				0.622	17.02						0.622	10.02
				0.6266	17.04						0.6266	10.06
				0.6313	17.07						0.6313	10.1
				0.6359	17.09						0.6359	10.14
				0.6405	17.11						0.6405	10.18
				0.6451	17.14						0.6451	10.22
				0.6497	17.16						0.6497	10.26
				0.6543	17.18						0.6543	10.3
				0.6589	17.2						0.6589	10.34
				0.6635	17.22						0.6635	10.38
				0.6681	17.24						0.6681	10.42
				0.6727	17.26						0.6727	10.45
				0.6773	17.28						0.6773	10.49
				0.682	17.3						0.682	10.53
				0.6866	17.32						0.6866	10.57
				0.6912	17.34						0.6912	10.6
				0.6958	17.36						0.6958	10.64
				0.7004	17.37						0.7004	10.68
				0.705	17.39						0.705	10.71
				0.7096	17.41						0.7096	10.75
				0.7142	17.42						0.7142	10.78
				0.7188	17.44						0.7188	10.82
				0.7234	17.46						0.7234	10.85
				0.728	17.47						0.728	10.89
				0.7327	17.49						0.7327	10.92
				0.7373	17.5						0.7373	10.95
				0.7419	17.52						0.7419	10.99
				0.7465	17.53						0.7465	11.02
				0.7511	17.55						0.7511	11.05
				0.7557	17.56						0.7557	11.09
				0.7603	17.57						0.7603	11.12
				0.7649	17.59						0.7649	11.15
				0.7695	17.6						0.7695	11.18
				0.7741	17.61						0.7741	11.22
				0.7788	17.63						0.7788	11.25
				0.7834	17.64						0.7834	11.28
				0.788	17.65						0.788	11.31
				0.7926	17.66						0.7926	11.34
				0.7972	17.67						0.7972	11.37
				0.8018	17.69						0.8018	11.4
				0.8064	17.7						0.8064	11.43
				0.811	17.71						0.811	11.46
				0.8156	17.72						0.8156	11.49
				0.8202	17.73						0.8202	11.52
				0.8248	17.74						0.8248	11.55
				0.8295	17.75						0.8295	11.58
				0.8341	17.76						0.8341	11.61
				0.8387	17.77						0.8387	11.63
				0.8433	17.78						0.8433	11.66
				0.8479	17.79						0.8479	11.69
				0.8525	17.8						0.8525	11.72
				0.8571	17.81						0.8571	11.75
				0.8617	17.82						0.8617	11.77
				0.8663	17.82						0.8663	11.8
				0.8709	17.83						0.8709	11.83
				0.8755	17.84						0.8755	11.85
				0.8802	17.85						0.8802	11.88
				0.8848	17.86						0.8848	11.91
				0.8894	17.87						0.8894	11.93
				0.894	17.87						0.894	11.96
				0.8986	17.88						0.8986	11.98
				0.9032	17.89						0.9032	12.01
				0.9078	17.9						0.9078	12.03
				0.9124	17.9						0.9124	12.06
				0.917	17.91						0.917	12.08
				0.9216	17.92						0.9216	12.11
				0.9263	17.92						0.9263	12.13
				0.9309	17.93						0.9309	12.16
				0.9355	17.94						0.9355	12.18
				0.9401	17.94						0.9401	12.21
				0.9447	17.95						0.9447	12.23
				0.9493	17.95						0.9493	12.25
				0.9539	17.96						0.9539	12.28
				0.9585	17.97						0.9585	12.3
				0.9631	17.97						0.9631	12.32
				0.9677	17.98						0.9677	12.34
				0.9723	17.98						0.9723	12.37
				0.977	17.99						0.977	12.39
				0.9816	17.99						0.9816	12.41
				0.9862	18						0.9862	12.43
				0.9908	18						0.9908	12.46
				0.9954	18.01						0.9954	12.48
				1	18.01						1	12.5
[truncated: 21 more columns]
