# Supplementary material for: A highly responsive pyruvate sensor reveals pathway-regulatory role of the mitochondrial pyruvate carrier MPC
Source: eLife. 2020 Mar 6;9:e53917. doi: 10.7554/eLife.53917 (PMC7077990; doi:10.7554/eLife.53917)
Supplement: Figure 3—figure supplement 1—source data 1. [file elife-53917-fig3-figsupp1-data1.xlsx]

## Sheet: 3-1B
Time (min)	mTFP	Venus	mTFP/Venus		Pulses	Time (min)		Time (min)	mTFP	Venus
0.1667	-2.34	-6.04	0.68		start pyruvate 10mM	1.3333		0.166667	646.414	597.074
0.3333	-3.09	-4.85	-1.21		end pyruvate 10mM	3.6667		0.333333	641.679	604.08
0.5	-2.6	-5.46	-0.14					0.5	644.748	600.464
0.6667	-4.15	-5.49	-1.63					0.666667	634.942	600.289
0.8333	-3.92	-4.89	-1.99					0.833333	636.359	603.855
1	-3.21	-5.05	-1.14					1	640.872	602.907
1.1667	-4.15	-6.37	-0.78					1.16667	634.93	595.129
1.3333	-4.09	-5.09	-1.97					1.33333	635.289	602.669
1.5	-2.49	-6.69	1.2					1.5	645.498	593.179
1.6667	-1.17	-8.05	3.91					1.66667	653.848	585.171
1.8333	-0.1	-8.53	5.51					1.83333	660.678	582.326
2	0.29	-8.62	6.01					2	663.162	581.771
2.1667	1.04	-8.73	6.89					2.16667	667.925	581.138
2.3333	1.86	-9.14	8.17					2.33333	673.111	578.719
2.5	1.16	-10.62	9.11					2.5	668.663	569.941
2.6667	1.71	-9.98	8.96					2.66667	672.206	573.745
2.8333	1.43	-9.68	8.33					2.83333	670.418	575.52
3	3.29	-10.12	10.75					3	682.252	572.918
3.1667	1.84	-10.39	9.55					3.16667	673.025	571.334
3.3333	1.78	-9.81	8.83					3.33333	672.62	574.779
3.5	2.32	-12.13	12.07					3.5	676.054	561.018
3.6667	1.75	-10.42	9.5					3.66667	672.461	571.135
3.8333	2.75	-11.24	11.47					3.83333	678.769	566.28
4	2.41	-9.22	8.82					4	676.655	578.27
4.1667	2.11	-8.8	8.05					4.16667	674.74	580.75
4.3333	2.25	-9.36	8.82					4.33333	675.622	577.391
4.5	-0.2	-8.42	5.29					4.5	660.022	582.991
4.6667	-1.2	-8.03	3.86					4.66667	653.672	585.292
4.8333	-1.2	-7.32	3.12					4.83333	653.656	589.48
5	-2.86	-7.86	2.02					5	643.152	586.302
5.1667	-2.18	-7.29	2.11					5.16667	647.442	589.678
5.3333	-3.72	-6.03	-0.68					5.33333	637.639	597.085
5.5	-2.9	-5.9	0					5.5	642.854	597.871
5.6667	-4.48	-7.94	0.46					5.66667	632.811	585.816
5.8333	-4.64	-7.95	0.31					5.83333	631.804	585.766
6	-4.11	-6.32	-0.79					6	635.191	595.423
6.1667	-3.87	-6.89	0.02					6.16667	636.701	591.996
