# Supplementary material for: A highly responsive pyruvate sensor reveals pathway-regulatory role of the mitochondrial pyruvate carrier MPC
Source: eLife. 2020 Mar 6;9:e53917. doi: 10.7554/eLife.53917 (PMC7077990; doi:10.7554/eLife.53917)
Supplement: Figure 3—figure supplement 2—source data 1. [file elife-53917-fig3-figsupp2-data1.xlsx]

## Sheet: 3-2A
PyronicSF mitochondrial concentration					Pyronic FRET mitochondrial concentration
Experiment	Mitochondrial pyruvate (uM)				Experiment	Mitochondrial pyruvate (uM)
1	6.9218				1	17.1978
1	9.6367				1	3.1276
1	14.7102				1	7.4004
1	15.8745				1	3.5637
1	8.2874				2	14.7871
1	13.4038				2	15.9934
1	21.6827				3	33.5711
1	21.2143				3	26.0201
1	25.262				4	11.4784
1	12.6432				4	26.2514
1	7.7531				5	35.9309
1	20.2499				5	28.8433
1	15.3289				5	30.1973
1	17.0736				5	32.9395
2	27.985				6	14.4787
2	14.0439				6	24.1136
2	24.2266				6	17.8548
2	23.2507				7	29.0452
2	24.3899				7	36.4655
2	18.4259				7	46.8163
2	22.7311
2	18.4428
2	30.4103
2	17.6678
3	23.7736
3	27.0212
3	28.0092
3	22.5262
3	10.5599
3	18.5344
3	11.1069
3	9.0992
3	26.7108
3	23.6161
4	23.4865
4	12.9212
4	26.3643
4	22.8333
4	15.8659
4	18.2578
4	17.2658
4	12.4093
4	19.8129
4	25.4816
5	16.974
5	28.6341
5	20.0983
5	24.3474
5	19.0359
5	35.3373
5	19.9684
5	26.487
5	8.8759
5	23.0426
5	24.8508
5	32.5069
5	37.5162
5	28.9276
5	13.6791
5	30.0388
5	26.8679
5	20.087
6	28.1591
6	33.8676
6	34.309
6	23.1886
6	37.0563
6	29.8508
6	19.33
6	40.8851
6	41.9513
6	27.372
6	43.7272
6	36.9355
6	35.6986
6	37.1625
6	13.7127
6	35.0893
6	22.8845
6	25.5013
6	36.8936
6	22.7401
7	21.2459
7	22.1415
7	31.7813
7	25.9504
7	25.9427
7	17.361
7	22.2716
7	26.3716
7	30.8545
7	27.1499
7	19.9697
8	3.3116
8	13.2415
8	4.8513
8	-3.1897
8	0.3586
8	14.4306
8	12.9245
8	20.9419
8	18.7431
8	14.4699
8	6.6169
8	14.9114
8	12.8021
9	21.0903
9	28.0638
9	25.3613
9	17.6738
9	12.3854
9	18.0546
9	12.9308
9	31.0013
9	10.0315
9	16.601
9	13.842
9	23.7362
9	21.5601
9	21.8009
9	17.4383
9	8.7974
9	12.5657
10	14.356
10	20.6688
10	17.695
10	9.0656
10	7.9395
10	9.3867
10	7.4654
10	22.0934

## Sheet: 3-2B
PyronicSFcytosolic concentration				Pyronic FRET cytosolic concentration
Experiment	Cytosolic pyruvate (uM)			X for individual experiments	Cytosolic pyruvate (uM)
1	58.546			1	108.524
1	85.4033			1	79.8977
1	102.211			1	106.619
1	185.814			1	70.6192
1	76.1238			1	40.1835
1	115.614			1	94.1674
1	116.908			1	104.462
1	127.253			1	63.9899
1	148.12			1	117.477
1	81.8047			1	97.1083
1	57.7779			2	63.5214
1	101.865			2	52.3538
1	36.7971			2	75.0734
1	53.0814			2	86.5124
1	39.4611			2	78.6748
1	49.8338			2	90.9566
1	64.5974			2	60.3938
1	110.027			2	71.5707
2	32.0932			2	56.7159
2	30.0883			2	61.2176
2	43.9668			3	45.2623
2	36.728			3	49.9024
2	26.5044			3	69.6928
2	11.4531			3	43.3332
2	54.0083			3	33.7477
3	23.4371			3	39.182
3	52.1056			3	36.6081
3	28.2716			3	18.2733
3	33.8198			3	9.2574
3	14.6739			3	51.3253
3	25.7214			4	20.345
3	31.3558			4	25.8243
3	42.8534			4	26.2978
3	47.0287			4	36.5491
3	18.3326			4	29.5269
3	28.2374			4	29.3631
3	17.3716			4	34.5987
3	38.3782			4	19.7299
3	18.5552			4	19.0059
3	44.3414			4	18.5575
3	15.3837			5	23.2933
3	4.2403			5	28.6474
4	25.1687			5	21.7009
4	22.4107			5	20.6638
4	34.0501			5	18.9407
4	20.3282			5	39.5237
4	4.0596			5	28.6571
4	2.6239			5	18.8914
4	17.7456			5	18.5135
4	0.6753			5	31.0291
4	11.9281
4	38.4451
4	25.924
4	33.0671
4	17.1339
4	31.5567
4	20.9335
4	21.8278
4	29.3282

## Sheet: 3-2C
Consumption rate plot
Experiement	Consumption rate (uM/s)
1	0.7852
1	0.8232
1	0.9296
1	0.7657
2	1.1619
2	1.1397
2	1.0856
3	1.2773
3	1.1648
3	2.2547
3	0.5064
4	0.2989
4	0.3754
4	0.4816
5	1.0641
5	1.1072
6	1.2267
6	0.7356
7	0.6064
7	1.0913
7	0.5508
7	0.2924
8	1.6069
8	2.4929
8	1.0148
9	2.3355
9	3.1485
9	2.2117
9	1.3116
9	1.3576
9	0.9396
9	2.0076
9	2.2138
9	1.8947
9	2.1573
10	0.4986
10	0.8006
10	0.3765
