# Supplementary material for: A highly responsive pyruvate sensor reveals pathway-regulatory role of the mitochondrial pyruvate carrier MPC
Source: eLife. 2020 Mar 6;9:e53917. doi: 10.7554/eLife.53917 (PMC7077990; doi:10.7554/eLife.53917)
Supplement: Figure 3—figure supplement 3—source data 1. [file elife-53917-fig3-figsupp3-data1.xlsx]

## Sheet: 3-3A
PyronicSF expression (F488 normalized to plate median)	pyruvate concentration (mM)
0.653	6.9218
0.6302	9.6367
1.0095	14.7102
0.9905	15.8745
0.6603	8.2874
2.2377	13.4038
2.6478	21.6827
2.201	21.2143
0.9538	25.262
0.6273	12.6432
0.697	7.7531
1.4307	20.2499
1.931	15.3289
1.6387	17.0736
0.9873	27.985
1.5075	14.0439
1.0127	24.2266
1.1001	23.2507
0.9206	24.3899
1.183	18.4259
1.0564	22.7311
0.7135	18.4428
0.6904	30.4103
0.5293	17.6678
2.1648	23.7736
1.8088	27.0212
1.0372	28.0092
0.9628	22.5262
0.6397	10.5599
0.7192	18.5344
0.7698	11.1069
1.8522	9.0992
0.8377	26.7108
1.1547	23.6161
0.6912	23.4865
0.5905	12.9212
1.5261	26.3643
1.2929	22.8333
1.0879	15.8659
1.5258	18.2578
0.6739	17.2658
0.3386	12.4093
1.496	19.8129
0.9121	25.4816
0.6967	16.974
0.5846	28.6341
0.5967	20.0983
1.051	24.3474
0.9246	19.0359
1.2841	35.3373
1.1617	19.9684
0.949	26.487
0.5455	8.8759
1.3322	23.0426
0.8452	24.8508
1.5353	32.5069
1.7175	37.5162
1.4735	28.9276
0.4427	13.6791
1.3215	30.0388
1.5398	26.8679
0.7211	20.087
1.733	28.1591
0.582	33.8676
0.9616	34.309
1.0384	23.1886
0.8354	37.0563
0.7847	29.8508
0.628	19.33
1.2663	40.8851
1.4382	41.9513
1.5666	27.372
1.2871	43.7272
2.1386	36.9355
1.6162	35.6986
1.1194	37.1625
1.238	13.7127
0.7606	35.0893
0.6375	22.8845
0.9233	25.5013
0.7969	36.8936
0.4655	22.7401
1.718	21.2459
0.9834	22.1415
0.736	31.7813
0.7837	25.9504
1.0365	25.9427
1.7038	17.361
1.3957	22.2716
1	26.3716
0.9993	30.8545
1.582	27.1499
0.7199	19.9697
1.1189	2.6493
1.0323	10.5932
1.4893	3.8811
1.3088	-2.5518
0.7787	0.2869
0.6734	11.5445
1	10.3396
0.8172	16.7535
0.9913	14.9945
1.0084	11.5759
1.2629	5.2935
0.7054	11.9291
0.9419	10.2417
1	21.0903
0.9303	28.0638
0.9843	25.3613
0.9665	17.6738
0.637	12.3854
0.6296	18.0546
0.4983	12.9308
1.5375	31.0013
0.9297	10.0315
1.1551	16.601
1.2157	13.842
1.5573	23.7362
1.3399	21.5601
1.3228	21.8009
1.9615	17.4383
0.432	8.7974
1.1386	12.5657
0.9866	14.356
1.0414	20.6688
1.6295	17.695
1.0238	9.0656
0.7744	7.9395
0.7052	9.3867
0.9575	7.4654
1.0134	22.0934

## Sheet: 3-3B
PyronicSF (F488 normalized to plate median)	pyruvate consumption rate (mM/s)
0.9877	0.2221
1.1053	0.1929
0.7572	0.2404
0.5489	0.3943
0.7984	0.1783
0.6981	0.0943
1.7463	0.2928
1.502	0.344
1.4263	0.3484
1.0123	0.1424
1.728	0.6452
1.9003	0.6307
1.7181	1.0439
1.2773	0.6033
0.8769	0.8514
0.7196	1.4238
1	0.9945
0.9938	0.994
1.2555	0.8167
0.4829	0.7588
0.9495	0.1395
1.4019	0.7115
0.6168	0.7027
0.9016	2.3983
0.6329	3.2447
1.142	2.2642
1.2577	1.336
0.9527	1.3811
0.7769	0.952
0.9422	2.0495
1.0729	2.2732
1.0473	1.9376
1.2066	2.2128
