# Supplementary material for: A highly responsive pyruvate sensor reveals pathway-regulatory role of the mitochondrial pyruvate carrier MPC
Source: eLife. 2020 Mar 6;9:e53917. doi: 10.7554/eLife.53917 (PMC7077990; doi:10.7554/eLife.53917)
Supplement: Figure 3—figure supplement 4—source data 1. [file elife-53917-fig3-figsupp4-data1.xlsx]

## Sheet: 3-4A
pyruvate (mM)	PyronicSF (DF%)	SE
0 pyr	0	0.5132
10uM pyr	2.0183	0.3184
20uM pyr	3.5679	0.3437
40uM pyr	7.8965	0.4727
80uM pyr	16.6006	0.3579

## Sheet: 3-4B
number of replicates	p value 0 vs 10 mM	p value 10 vs 20 mM	p value 20 vs 40 mM	p value 40 vs 80 mM
2	0.3964	0.582	0.0816	0.0218
3	0.2635	0.2657	0.0511	0.0147
4	0.1034	0.3114	0.0158	0.0061214
5	0.1241	0.2487	0.0036092	0.00080518
6	0.0981	0.228	0.0010128	0.00012396
7	0.1157	0.1591	0.00058829	3.7279e-05
8	0.0736	0.1128	0.00021621	2.4037e-05
9	0.0706	0.0859	8.106e-05	3.6355e-06
10	0.0551	0.0507	2.0458e-05	4.523e-07
11	0.0381	0.0348	1.5262e-05	1.241e-07
12	0.0359	0.0187	2.7678e-06	1.4475e-08
16	0.0108	0.0065163	5.4449e-08	2.209e-11
