# Supplementary material for: A highly responsive pyruvate sensor reveals pathway-regulatory role of the mitochondrial pyruvate carrier MPC
Source: eLife. 2020 Mar 6;9:e53917. doi: 10.7554/eLife.53917 (PMC7077990; doi:10.7554/eLife.53917)
Supplement: Figure 3—figure supplement 5—source data 1. [file elife-53917-fig3-figsupp5-data1.xlsx]

## Sheet: 3-5
Sensitivity PyronicSF and Pyronic
Pyruvate (mM)	PyronicSF (% change)	Pyronic (% change)
0.001	5.2083e-06	3.7382e-06
0.00105	5.4687e-06	3.9252e-06
0.0011025	5.7422e-06	4.1214e-06
0.0011576	6.0293e-06	4.3275e-06
0.0012155	6.3307e-06	4.5438e-06
0.0012763	6.6473e-06	4.771e-06
0.0013401	6.9796e-06	5.0096e-06
0.0014071	7.3286e-06	5.26e-06
0.0014775	7.695e-06	5.523e-06
0.0015513	8.0798e-06	5.7992e-06
0.0016289	8.4838e-06	6.0891e-06
0.0017103	8.908e-06	6.3936e-06
0.0017959	9.3533e-06	6.7133e-06
0.0018856	9.821e-06	7.0489e-06
0.0019799	1.0312e-05	7.4013e-06
0.0020789	1.0828e-05	7.7714e-06
0.0021829	1.1369e-05	8.1599e-06
0.002292	1.1937e-05	8.5679e-06
0.0024066	1.2534e-05	8.9963e-06
0.002527	1.3161e-05	9.4461e-06
0.0026533	1.3819e-05	9.9184e-06
0.002786	1.451e-05	1.0414e-05
0.0029253	1.5236e-05	1.0935e-05
0.0030715	1.5997e-05	1.1482e-05
0.0032251	1.6797e-05	1.2056e-05
0.0033864	1.7637e-05	1.2658e-05
0.0035557	1.8519e-05	1.3291e-05
0.0037335	1.9445e-05	1.3956e-05
0.0039201	2.0417e-05	1.4654e-05
0.0041161	2.1438e-05	1.5386e-05
0.0043219	2.251e-05	1.6155e-05
0.004538	2.3635e-05	1.6963e-05
0.0047649	2.4817e-05	1.7811e-05
0.0050032	2.6058e-05	1.8702e-05
0.0052533	2.7361e-05	1.9637e-05
0.005516	2.8729e-05	2.0618e-05
0.0057918	3.0165e-05	2.1649e-05
0.0060814	3.1673e-05	2.2732e-05
0.0063855	3.3257e-05	2.3868e-05
0.0067048	3.492e-05	2.5061e-05
0.00704	3.6666e-05	2.6314e-05
0.007392	3.8499e-05	2.763e-05
0.0077616	4.0424e-05	2.9011e-05
0.0081497	4.2445e-05	3.0461e-05
0.0085572	4.4567e-05	3.1984e-05
0.008985	4.6795e-05	3.3583e-05
0.0094343	4.9135e-05	3.5262e-05
0.009906	5.1591e-05	3.7025e-05
0.0104	5.4171e-05	3.8876e-05
0.0109	5.6879e-05	4.0819e-05
0.0115	5.9723e-05	4.286e-05
0.012	6.2709e-05	4.5002e-05
0.0126	6.5844e-05	4.7252e-05
0.0133	6.9137e-05	4.9614e-05
0.0139	7.2593e-05	5.2094e-05
0.0146	7.6223e-05	5.4698e-05
0.0154	8.0033e-05	5.7432e-05
0.0161	8.4035e-05	6.0302e-05
0.0169	8.8236e-05	6.3317e-05
0.0178	9.2648e-05	6.6481e-05
0.0187	9.728e-05	6.9804e-05
0.0196	0.00010214	7.3293e-05
0.0206	0.00010725	7.6956e-05
0.0216	0.00011261	8.0803e-05
0.0227	0.00011824	8.4841e-05
0.0238	0.00012415	8.9081e-05
0.025	0.00013036	9.3533e-05
0.0263	0.00013688	9.8208e-05
0.0276	0.00014372	0.00010312
0.029	0.00015091	0.00010827
0.0304	0.00015845	0.00011368
0.0319	0.00016637	0.00011936
0.0335	0.00017469	0.00012532
0.0352	0.00018342	0.00013159
0.037	0.00019259	0.00013816
0.0388	0.00020222	0.00014506
0.0408	0.00021233	0.00015231
0.0428	0.00022294	0.00015992
0.045	0.00023409	0.00016791
0.0472	0.00024579	0.0001763
0.0496	0.00025808	0.0001851
0.052	0.00027098	0.00019435
0.0546	0.00028453	0.00020406
0.0574	0.00029875	0.00021425
0.0602	0.00031368	0.00022495
0.0633	0.00032936	0.00023618
0.0664	0.00034583	0.00024798
0.0697	0.00036311	0.00026036
0.0732	0.00038126	0.00027336
0.0769	0.00040032	0.00028701
0.0807	0.00042033	0.00030134
0.0848	0.00044134	0.00031638
0.089	0.0004634	0.00033217
0.0935	0.00048656	0.00034875
0.0981	0.00051087	0.00036616
0.103	0.00053641	0.00038443
0.1082	0.00056322	0.00040361
0.1136	0.00059136	0.00042375
0.1193	0.00062092	0.00044489
0.1252	0.00065195	0.00046708
0.1315	0.00068453	0.00049038
0.1381	0.00071873	0.00051484
0.145	0.00075465	0.00054051
0.1522	0.00079235	0.00056746
0.1598	0.00083195	0.00059574
0.1678	0.00087351	0.00062544
0.1762	0.00091716	0.00065661
0.185	0.00096298	0.00068932
0.1943	0.0010111	0.00072366
0.204	0.0010616	0.00075971
0.2142	0.0011146	0.00079754
0.2249	0.0011703	0.00083725
0.2362	0.0012288	0.00087893
0.248	0.0012901	0.00092267
0.2604	0.0013546	0.00096858
0.2734	0.0014222	0.0010168
0.2871	0.0014933	0.0010673
0.3014	0.0015678	0.0011204
0.3165	0.0016461	0.0011761
0.3323	0.0017283	0.0012345
0.3489	0.0018146	0.0012958
0.3664	0.0019052	0.0013602
0.3847	0.0020003	0.0014277
0.4039	0.0021001	0.0014985
0.4241	0.002205	0.0015729
0.4453	0.002315	0.0016509
0.4676	0.0024305	0.0017327
0.491	0.0025518	0.0018185
0.5155	0.0026791	0.0019086
0.5413	0.0028128	0.002003
0.5683	0.0029531	0.0021021
0.5968	0.0031004	0.0022061
0.6266	0.003255	0.0023151
0.6579	0.0034173	0.0024294
0.6908	0.0035876	0.0025493
0.7254	0.0037665	0.0026751
0.7616	0.0039542	0.0028069
0.7997	0.0041513	0.0029452
0.8397	0.0043581	0.0030901
0.8817	0.0045752	0.0032421
0.9258	0.0048031	0.0034014
0.9721	0.0050422	0.0035684
1.0207	0.0052933	0.0037434
1.0717	0.0055568	0.0039269
1.1253	0.0058333	0.0041191
1.1815	0.0061235	0.0043205
1.2406	0.0064281	0.0045316
1.3026	0.0067478	0.0047527
1.3678	0.0070832	0.0049843
1.4362	0.0074353	0.0052269
1.508	0.0078047	0.0054809
1.5834	0.0081923	0.005747
1.6625	0.0085991	0.0060255
1.7457	0.0090259	0.006317
1.833	0.0094738	0.0066222
1.9246	0.0099437	0.0069415
2.0208	0.0104	0.0072757
2.1219	0.011	0.0076253
2.228	0.0115	0.0079909
2.3394	0.0121	0.0083733
2.4563	0.0127	0.0087731
2.5792	0.0133	0.009191
2.7081	0.0139	0.0096278
2.8435	0.0146	0.0101
2.9857	0.0154	0.0106
3.135	0.0161	0.0111
3.2917	0.0169	0.0116
3.4563	0.0177	0.0121
3.6291	0.0186	0.0127
3.8106	0.0195	0.0133
4.0011	0.0205	0.0139
4.2012	0.0215	0.0145
4.4112	0.0226	0.0152
4.6318	0.0237	0.0159
4.8634	0.0248	0.0166
5.1065	0.026	0.0174
5.3619	0.0273	0.0182
5.63	0.0286	0.019
5.9115	0.03	0.0198
6.207	0.0315	0.0207
6.5174	0.033	0.0216
6.8433	0.0346	0.0226
7.1854	0.0363	0.0236
7.5447	0.0381	0.0246
7.9219	0.0399	0.0257
8.318	0.0419	0.0268
8.7339	0.0439	0.0279
9.1706	0.046	0.0291
9.6292	0.0482	0.0303
10.1106	0.0505	0.0315
10.6161	0.0529	0.0328
11.147	0.0554	0.0341
11.7043	0.0581	0.0355
12.2895	0.0608	0.0369
12.904	0.0637	0.0384
13.5492	0.0667	0.0399
14.2266	0.0699	0.0414
14.938	0.0732	0.0429
15.6849	0.0766	0.0445
16.4691	0.0802	0.0462
17.2926	0.0839	0.0478
18.1572	0.0878	0.0495
19.0651	0.0918	0.0513
20.0183	0.096	0.053
21.0192	0.1004	0.0548
22.0702	0.105	0.0566
23.1737	0.1098	0.0584
24.3324	0.1147	0.0603
25.549	0.1199	0.0621
26.8265	0.1253	0.064
28.1678	0.1308	0.0658
29.5762	0.1366	0.0677
31.055	0.1426	0.0696
32.6077	0.1488	0.0714
34.2381	0.1553	0.0733
35.95	0.1619	0.0751
37.7475	0.1689	0.0769
39.6349	0.176	0.0787
41.6167	0.1834	0.0804
43.6975	0.191	0.0821
45.8824	0.1989	0.0838
48.1765	0.207	0.0854
50.5853	0.2154	0.0869
53.1146	0.224	0.0884
55.7703	0.2329	0.0898
58.5588	0.242	0.0911
61.4868	0.2514	0.0924
64.5611	0.2609	0.0935
67.7891	0.2708	0.0946
71.1786	0.2808	0.0956
74.7375	0.291	0.0965
78.4744	0.3015	0.0972
82.3981	0.3122	0.0979
86.518	0.323	0.0984
90.8439	0.334	0.0989
95.3861	0.3452	0.0992
100.155	0.3565	0.0994
105.163	0.3679	0.0995
110.421	0.3794	0.0995
115.942	0.391	0.0993
121.74	0.4026	0.0991
127.827	0.4143	0.0987
134.218	0.426	0.0982
140.929	0.4376	0.0976
147.975	0.4492	0.0969
155.374	0.4607	0.096
163.143	0.4721	0.0951
171.3	0.4833	0.0941
179.865	0.4944	0.093
188.858	0.5052	0.0918
198.301	0.5157	0.0905
208.216	0.5259	0.0891
218.627	0.5358	0.0877
229.558	0.5454	0.0862
241.036	0.5545	0.0846
253.088	0.5632	0.083
265.742	0.5714	0.0813
279.029	0.5791	0.0796
292.981	0.5862	0.0778
307.63	0.5928	0.076
323.011	0.5987	0.0742
339.162	0.604	0.0724
356.12	0.6087	0.0705
373.926	0.6127	0.0687
392.622	0.616	0.0668
412.253	0.6185	0.0649
432.866	0.6204	0.0631
454.509	0.6215	0.0612
477.235	0.6219	0.0594
501.097	0.6215	0.0575
526.151	0.6204	0.0557
552.459	0.6186	0.0539
580.082	0.6161	0.0522
609.086	0.6128	0.0504
639.54	0.6088	0.0487
671.517	0.6042	0.047
705.093	0.5989	0.0454
740.348	0.593	0.0437
777.365	0.5864	0.0422
816.234	0.5793	0.0406
857.045	0.5716	0.0391
899.898	0.5635	0.0377
944.892	0.5548	0.0362
992.137	0.5457	0.0348
1041.74	0.5362	0.0335
1093.83	0.5263	0.0322
1148.52	0.516	0.0309
1205.95	0.5055	0.0297
1266.25	0.4947	0.0285
1329.56	0.4837	0.0273
1396.04	0.4725	0.0262
1465.84	0.4611	0.0251
1539.13	0.4496	0.0241
1616.09	0.438	0.0231
1696.89	0.4264	0.0221
1781.74	0.4147	0.0212
1870.82	0.403	0.0203
1964.36	0.3914	0.0194
2062.58	0.3798	0.0186
2165.71	0.3683	0.0178
2274	0.3568	0.017
2387.7	0.3455	0.0163
2507.08	0.3344	0.0156
2632.43	0.3234	0.0149
2764.06	0.3125	0.0142
2902.26	0.3019	0.0136
3047.37	0.2914	0.013
3199.74	0.2811	0.0124
3359.73	0.2711	0.0119
3527.71	0.2613	0.0113
3704.1	0.2517	0.0108
3889.31	0.2423	0.0103
4083.77	0.2332	0.0098561
4287.96	0.2243	0.0094095
4502.36	0.2157	0.0089822
4727.47	0.2073	0.0085733
4963.85	0.1992	0.0081822
5212.04	0.1913	0.0078082
5472.64	0.1836	0.0074506
5746.27	0.1762	0.0071087
6033.59	0.1691	0.0067819
6335.27	0.1622	0.0064697
6652.03	0.1555	0.0061713
6984.63	0.149	0.0058862
7333.86	0.1428	0.005614
7700.56	0.1368	0.0053539
8085.59	0.131	0.0051056
8489.87	0.1254	0.0048685
8914.36	0.1201	0.0046422
9360.08	0.1149	0.0044261
9828.08	0.1099	0.0042198
10319.5	0.1052	0.004023
10835.5	0.1006	0.0038351
11377.2	0.0962	0.0036559
11946.1	0.092	0.0034849
12543.4	0.0879	0.0033217
13170.6	0.084	0.0031661
13829.1	0.0803	0.0030176
14520.6	0.0767	0.002876
15246.6	0.0733	0.002741
16008.9	0.07	0.0026122
16809.4	0.0668	0.0024894
17649.8	0.0638	0.0023722
18532.3	0.0609	0.0022606
19458.9	0.0582	0.0021541
20431.9	0.0555	0.0020526
21453.5	0.053	0.0019558
22526.1	0.0506	0.0018635
23652.4	0.0483	0.0017756
24835.1	0.0461	0.0016918
26076.8	0.0439	0.0016119
27380.7	0.0419	0.0015357
28749.7	0.04	0.0014631
30187.2	0.0381	0.0013939
31696.5	0.0364	0.001328
33281.4	0.0347	0.0012652
34945.4	0.0331	0.0012053
36692.7	0.0316	0.0011482
38527.3	0.0301	0.0010938
40453.7	0.0287	0.001042
42476.4	0.0274	0.00099266
44600.2	0.0261	0.00094562
46830.2	0.0249	0.00090079
49171.7	0.0237	0.00085808
51630.3	0.0226	0.00081739
54211.8	0.0215	0.00077862
56922.4	0.0205	0.00074168
59768.6	0.0196	0.00070649
62757	0.0186	0.00067296
65894.8	0.0178	0.00064102
69189.6	0.0169	0.00061059
72649.1	0.0161	0.00058159
76281.5	0.0154	0.00055398
80095.6	0.0147	0.00052767
84100.4	0.014	0.0005026
88305.4	0.0133	0.00047873
92720.6	0.0127	0.00045598
97356.7	0.0121	0.00043432
102225	0.0115	0.00041368
107336	0.011	0.00039402
112703	0.0105	0.00037529
118338	0.01	0.00035745
124255	0.0094889	0.00034046
130467	0.0090403	0.00032427
136991	0.0086128	0.00030886
143840	0.0082054	0.00029417
151032	0.0078171	0.00028018
158584	0.0074471	0.00026686
166513	0.0070945	0.00025417
174839	0.0067585	0.00024208
183581	0.0064384	0.00023056
192760	0.0061333	0.0002196
202398	0.0058426	0.00020915
