# Supplementary material for: A highly responsive pyruvate sensor reveals pathway-regulatory role of the mitochondrial pyruvate carrier MPC
Source: eLife. 2020 Mar 6;9:e53917. doi: 10.7554/eLife.53917 (PMC7077990; doi:10.7554/eLife.53917)
Supplement: Figure 3—source data 1. [file elife-53917-fig3-data1.xlsx]

## Sheet: 3A
Time (min)	Percentage of maximum change		Right axis			Pulses	Time (min)		Time (min)	mitoPyronicSF	mito-mCherry
0.1667	5.6715		DF%	pyruvate (mM)		start of physiological buffer	0		0.166667	1732735	2426137
0.3333	5.3844		100	infinite		end of physiological buffer	1.67		0.333333	1747835	2446196
0.5	4.9098		86.9565	3200		start of pyruvate 10mM	4.167		0.5	1766972	2488065
0.6667	5.1082		76.9231	1600		end of pyruvate 10mM	5.66		0.666667	1756993	2496051
0.8333	5.3296		62.5	800					0.833333	1773585	2511235
1	6.2158		45.4545	400					1	1779546	2509369
1.1667	5.3418		29.4118	200					1.16667	1812424	2515227
1.3333	5.6228		17.2414	100					1.33333	1794290	2530675
1.5	6.6117		9.434	50					1.5	1805715	2533903
1.6667	3.8374		4.9505	25					1.66667	1836565	2531436
1.8333	2.5159		0	0					1.83333	1815379	2639008
2	0.4982								2	1717082	2555524
2.1667	-0.4982								2.16667	1632489	2526432
2.3333	1.1204								2.33333	1640038	2594931
2.5	0.9231								2.5	1675455	2563317
2.6667	0.7638								2.66667	1681973	2584849
2.8333	2.0609								2.83333	1694452	2614288
3	2.6128								3	1707998	2565189
3.1667	2.708								3.16667	1722535	2559048
3.3333	3.8655								3.33333	1704470	2525591
3.5	4.14								3.5	1752095	2540409
3.6667	3.5316								3.66667	1745250	2516146
3.8333	5.2394								3.83333	1713262	2497415
4	3.5701								4	1773207	2504307
4.1667	4.8008								4.16667	1726629	2516134
4.3333	29.8411								4.33333	1760480	2506594
4.5	52.6875								4.5	2579998	2511548
4.6667	57.2977								4.66667	3373682	2547321
4.8333	58.5254								4.83333	3517761	2541321
5	58.9299								5	3511303	2509004
5.1667	58.9656								5.16667	3613609	2570026
5.3333	58.6459								5.33333	3564875	2535858
5.5	59.3212								5.5	3661956	2609743
5.6667	59.7449								5.66667	3641439	2580078
5.8333	58.8918								5.83333	3670398	2590073
6	61.3003								6	3660703	2603152
6.1667	59.2464								6.16667	3737540	2599867
									6.33333	3692956	2616948
									6.5	3799765	2592765

## Sheet: 3B
Time (min)	Percentage of maximum change		Right axis			Pulses	Time (min)		Time (min)	mitoPyronic (mTFP)	mitoPyronic (Venus)
0.1667	14.3438		DF%	pyruvate (mM)		start of physiological buffer	0		0.166667	3204031	3097845
0.3333	17.9838		100	infinite		end of physiological buffer	1.67		0.333333	3199897	3074213
0.5	17.391		88.2029	800		start of pyruvate 10mM	4.167		0.5	3186792	3064790
0.6667	21.909		78.8955	400		end of pyruvate 10mM	5.66		0.666667	3162491	3017624
0.8333	18.5572		65.1466	200					0.833333	3141780	3015364
1	11.4231		48.3092	100					1	3122894	3034951
1.1667	16.9637		31.8471	50					1.16667	3132208	3014544
1.3333	18.695		18.9394	25					1.33333	3122953	2996575
1.5	16.1257		0	0					1.5	3113904	3001321
1.6667	24.2813								1.66667	3123921	2968625
1.8333	21.5646								1.83333	3115705	2974755
2	5.6816								2	3071278	3015323
2.1667	-0.6777								2.16667	3060363	3039042
2.3333	7.6115								2.33333	3039266	2973669
2.5	-1.6235								2.5	3036443	3020437
2.6667	-0.4799								2.66667	2966263	2944548
2.8333	2.1034								2.83333	2990132	2954492
3	1.7753								3	2992567	2958639
3.1667	-10.1194								3.16667	2952197	2982377
3.3333	4.282								3.33333	2918680	2872669
3.5	-0.151								3.5	2896598	2873690
3.6667	-4.5138								3.66667	2896318	2896162
3.8333	-1.9396								3.83333	2859895	2846444
4	3.649								4	2859619	2817725
4.1667	-1.6145								4.16667	2839005	2823994
4.3333	36.3363								4.33333	2917865	2716339
4.5	83.4318								4.5	2992995	2580922
4.6667	83.5855								4.66667	3032190	2614092
4.8333	84.1898								4.83333	2995677	2580174
5	76.6796								5	2935907	2558732
5.1667	81.136								5.16667	2914021	2521882
5.3333	81.2903								5.33333	2940687	2544343
5.5	83.3155								5.5	2895191	2497038
5.6667	85.7696								5.66667	2940552	2526456
5.8333	95.1253								5.83333	2951349	2499273
6	83.297								6	2857645	2464727
6.1667	91.9073								6.16667	2873271	2445248
6.3333	80.305								6.33333	2833165	2455111
6.5	89.9098								6.5	2853063	2435564

## Sheet: 3C
PyronicSF			PyronicSF			Pyronic			Pyronic
mitochondria			cytosol			mitochondria			cytosol
X axis position	pyruvate (mM)		X axis position	pyruvate (mM)		X axis position	pyruvate (mM)		X axis position	pyruvate (mM)
1.52	6.9218		2.84	58.546		4.054	17.1978		5.441	108.524
1.54	9.6367		2.83	85.4033		4.117	3.1276		5.366	79.8977
1.49	14.7102		2.77	102.211		4.028	7.4004		5.32	106.619
1.48	15.8745		2.83	185.814		4.039	3.5637		5.308	70.6192
1.57	8.2874		2.75	76.1238		4.084	14.7871		5.498	40.1835
1.54	13.4038		2.73	115.614		4.079	15.9934		5.359	94.1674
1.59	21.6827		2.76	116.908		4.012	33.5711		5.444	104.462
1.55	21.2143		2.77	127.253		4.009	26.0201		5.429	63.9899
1.6	25.262		2.73	148.12		4.153	11.4784		5.301	117.477
1.48	12.6432		2.9	81.8047		4.14	26.2514		5.389	97.1083
1.48	7.7531		2.82	57.7779		4.104	35.9309		5.475	63.5214
1.45	20.2499		2.74	101.865		4.015	28.8433		5.414	52.3538
1.4	15.3289		2.86	36.7971		4.015	30.1973		5.421	75.0734
1.42	17.0736		2.88	53.0814		4.153	32.9395		5.486	86.5124
1.48	27.985		2.74	39.4611		4.132	14.4787		5.493	78.6748
1.52	14.0439		2.78	49.8338		4.111	24.1136		5.474	90.9566
1.6	24.2266		2.85	64.5974		4.067	17.8548		5.426	60.3938
1.41	23.2507		2.84	110.027		4.058	29.0452		5.407	71.5707
1.59	24.3899		2.84	32.0932		4.171	36.4655		5.449	56.7159
1.57	18.4259		2.88	30.0883		4.145	46.8163		5.322	61.2176
1.57	22.7311		2.87	43.9668					5.44	45.2623
1.41	18.4428		2.9	36.728					5.478	49.9024
1.46	30.4103		2.82	26.5044					5.305	69.6928
1.42	17.6678		2.8	11.4531					5.5	43.3332
1.51	23.7736		2.73	54.0083					5.463	33.7477
1.46	27.0212		2.75	23.4371					5.446	39.182
1.58	28.0092		2.72	52.1056					5.42	36.6081
1.41	22.5262		2.82	28.2716					5.489	18.2733
1.42	10.5599		2.81	33.8198					5.45	9.2574
1.59	18.5344		2.82	14.6739					5.488	51.3253
1.43	11.1069		2.83	25.7214					5.413	20.345
1.47	9.0992		2.83	31.3558					5.37	25.8243
1.59	26.7108		2.7	42.8534					5.365	26.2978
1.5	23.6161		2.83	47.0287					5.401	36.5491
1.58	23.4865		2.71	18.3326					5.355	29.5269
1.6	12.9212		2.8	28.2374					5.452	29.3631
1.45	26.3643		2.77	17.3716					5.422	34.5987
1.54	22.8333		2.74	38.3782					5.403	19.7299
1.46	15.8659		2.88	18.5552					5.429	19.0059
1.52	18.2578		2.77	44.3414					5.308	18.5575
1.6	17.2658		2.71	15.3837					5.309	23.2933
1.56	12.4093		2.79	4.2403					5.323	28.6474
1.54	19.8129		2.77	25.1687					5.38	21.7009
1.41	25.4816		2.75	22.4107					5.473	20.6638
1.4	16.974		2.85	34.0501					5.388	18.9407
1.5	28.6341		2.73	20.3282					5.427	39.5237
1.48	20.0983		2.81	4.0596					5.472	28.6571
1.42	24.3474		2.89	2.6239					5.326	18.8914
1.58	19.0359		2.83	17.7456					5.324	18.5135
1.52	35.3373		2.83	0.6753					5.422	31.0291
1.58	19.9684		2.8	11.9281
1.51	26.487		2.89	38.4451
1.4	8.8759		2.9	25.924
1.57	23.0426		2.8	33.0671
1.45	24.8508		2.87	17.1339
1.41	32.5069		2.71	31.5567
1.47	37.5162		2.76	20.9335
1.56	28.9276		2.7	21.8278
1.56	13.6791		2.81	29.3282
1.58	30.0388
1.48	26.8679
1.6	20.087
1.6	28.1591
1.5	33.8676
1.44	34.309
1.57	23.1886
1.49	37.0563
1.52	29.8508
1.6	19.33
1.6	40.8851
1.43	41.9513
1.58	27.372
1.46	43.7272
1.52	36.9355
1.55	35.6986
1.56	37.1625
1.56	13.7127
1.48	35.0893
1.46	22.8845
1.44	25.5013
1.49	36.8936
1.4	22.7401
1.6	21.2459
1.45	22.1415
1.59	31.7813
1.44	25.9504
1.51	25.9427
1.59	17.361
1.56	22.2716
1.57	26.3716
1.59	30.8545
1.53	27.1499
1.48	19.9697
1.42	3.3116
1.45	13.2415
1.5	4.8513
1.47	-3.1897
1.49	0.3586
1.52	14.4306
1.42	12.9245
1.44	20.9419
1.57	18.7431
1.41	14.4699
1.57	6.6169
1.47	14.9114
1.48	12.8021
1.49	21.0903
1.45	28.0638
1.5	25.3613
1.47	17.6738
1.49	12.3854
1.52	18.0546
1.42	12.9308
1.44	31.0013
1.57	10.0315
1.41	16.601
1.57	13.842
1.47	23.7362
1.48	21.5601
1.49	21.8009
1.6	17.4383
1.59	8.7974
1.43	12.5657
1.4	14.356
1.46	20.6688
1.6	17.695
1.42	9.0656
1.42	7.9395
1.56	9.3867
1.6	7.4654
1.56	22.0934

## Sheet: 3E
Time (s)	pyruvate mito (mM)	relative PDH flux	relative PC flux		Pulses	Time (s)
-115.758	21.18	0.999	0.9971		start PDH activation	0
-105.758	21.18	0.999	0.9971		end PDH activation	300
-95.7577	21.18	0.999	0.9971		start MPC activation	600
-85.7577	21.18	0.999	0.9971		end MPC activation	900
-75.7577	21.18	0.999	0.9971		start both activation	1200
-65.7577	21.18	0.999	0.9971		end both activation	1500
-55.7577	21.18	0.999	0.9971
-45.7577	21.18	0.999	0.9971
-35.7577	21.18	0.999	0.9971
-25.7577	21.18	0.999	0.9971
-15.7577	21.18	0.999	0.9971
-5.7577	21.18	0.999	0.9971
-0.7577	21.18	0.999	0.9971
0.2423	21.067	1.9945	0.9922
1.2423	20.189	1.967	0.9543
2.7531	18.958	1.9256	0.9008
4.3516	17.775	1.8823	0.8488
5.9549	16.706	1.8399	0.8013
7.5617	15.745	1.7988	0.7583
9.1769	14.885	1.7593	0.7195
10.8064	14.116	1.7216	0.6846
12.4567	13.43	1.6859	0.6532
14.1348	12.82	1.6524	0.6252
15.8479	12.279	1.6211	0.6002
17.6037	11.802	1.5922	0.5781
19.4111	11.382	1.5657	0.5585
21.279	11.015	1.5417	0.5414
23.2177	10.696	1.5201	0.5264
25.2387	10.42	1.5009	0.5135
27.3544	10.184	1.484	0.5023
29.5792	9.9833	1.4694	0.4929
31.9294	9.8147	1.4569	0.4849
34.4244	9.6745	1.4463	0.4783
37.0871	9.5594	1.4375	0.4728
39.9448	9.4665	1.4303	0.4684
43.0316	9.3926	1.4246	0.4649
46.3898	9.3352	1.4201	0.4622
50.0737	9.2916	1.4166	0.4601
54.1546	9.2594	1.4141	0.4586
58.7291	9.2364	1.4123	0.4575
63.9318	9.2208	1.411	0.4567
69.9591	9.2108	1.4102	0.4563
77.1109	9.2048	1.4097	0.456
85.8768	9.2016	1.4095	0.4558
95.8768	9.2002	1.4094	0.4558
105.877	9.1997	1.4093	0.4557
115.877	9.1996	1.4093	0.4557
125.877	9.1995	1.4093	0.4557
135.877	9.1995	1.4093	0.4557
145.877	9.1995	1.4093	0.4557
155.877	9.1995	1.4093	0.4557
165.877	9.1995	1.4093	0.4557
175.877	9.1995	1.4093	0.4557
185.877	9.1995	1.4093	0.4557
195.877	9.1995	1.4093	0.4557
205.877	9.1995	1.4093	0.4557
215.877	9.1995	1.4093	0.4557
225.877	9.1995	1.4093	0.4557
235.877	9.1995	1.4093	0.4557
245.877	9.1995	1.4093	0.4557
255.877	9.1995	1.4093	0.4557
265.877	9.1995	1.4093	0.4557
275.877	9.1995	1.4093	0.4557
285.877	9.1995	1.4093	0.4557
295.877	9.1995	1.4093	0.4557
298.377	9.1995	1.4093	0.4557
299.627	9.1995	1.4093	0.4557
300.627	9.6371	0.7217	0.4765
301.627	10.229	0.7436	0.5045
303.627	11.304	0.7803	0.5549
306.212	12.51	0.8173	0.6109
309.681	13.868	0.8545	0.6733
313.597	15.119	0.8852	0.7301
317.348	16.099	0.9071	0.7742
321.086	16.907	0.9241	0.8103
324.86	17.584	0.9375	0.8403
328.741	18.164	0.9485	0.8659
332.766	18.663	0.9576	0.8879
336.963	19.093	0.9651	0.9067
341.357	19.463	0.9715	0.9228
345.974	19.78	0.9768	0.9366
350.839	20.05	0.9812	0.9483
355.982	20.278	0.9849	0.9582
361.437	20.469	0.988	0.9665
367.245	20.628	0.9905	0.9733
373.452	20.759	0.9925	0.979
380.118	20.865	0.9942	0.9835
387.312	20.949	0.9955	0.9872
395.125	21.016	0.9965	0.99
403.672	21.067	0.9973	0.9922
413.1	21.105	0.9978	0.9939
423.1	21.131	0.9982	0.995
433.1	21.148	0.9985	0.9957
443.1	21.16	0.9987	0.9962
453.1	21.167	0.9988	0.9965
463.1	21.172	0.9988	0.9967
473.1	21.175	0.9989	0.9969
483.1	21.177	0.9989	0.9969
493.1	21.178	0.9989	0.997
503.1	21.179	0.999	0.997
513.1	21.179	0.999	0.9971
523.1	21.18	0.999	0.9971
533.1	21.18	0.999	0.9971
543.1	21.18	0.999	0.9971
553.1	21.18	0.999	0.9971
563.1	21.18	0.999	0.9971
573.1	21.18	0.999	0.9971
583.1	21.18	0.999	0.9971
593.1	21.18	0.999	0.9971
598.1	21.18	0.999	0.9971
599.35	21.18	0.999	0.9971
600.35	21.33	1.0012	1.0035
601.35	22.486	1.0179	1.0529
602.975	24.226	1.041	1.1263
605.853	26.945	1.0726	1.2389
609.192	29.614	1.0994	1.347
612.269	31.7	1.118	1.43
615.325	33.478	1.1324	1.4996
618.365	35.004	1.1439	1.5586
621.449	36.343	1.1533	1.6097
624.609	37.53	1.1612	1.6546
627.856	38.584	1.1679	1.6942
631.216	39.522	1.1737	1.7291
634.695	40.357	1.1786	1.76
638.309	41.099	1.1828	1.7872
642.066	41.755	1.1865	1.8112
645.98	42.334	1.1896	1.8323
650.065	42.843	1.1923	1.8507
654.338	43.288	1.1947	1.8668
658.815	43.675	1.1967	1.8807
663.517	44.01	1.1984	1.8927
668.467	44.298	1.1998	1.903
673.694	44.543	1.201	1.9118
679.227	44.75	1.202	1.9191
685.104	44.924	1.2029	1.9253
691.372	45.067	1.2036	1.9304
698.084	45.184	1.2041	1.9346
705.306	45.279	1.2046	1.938
713.123	45.354	1.205	1.9406
721.64	45.412	1.2052	1.9427
730.996	45.456	1.2055	1.9442
740.996	45.488	1.2056	1.9454
750.996	45.509	1.2057	1.9461
760.996	45.523	1.2058	1.9466
770.996	45.532	1.2058	1.9469
780.996	45.538	1.2058	1.9471
790.996	45.542	1.2059	1.9473
800.996	45.544	1.2059	1.9474
810.996	45.546	1.2059	1.9474
820.996	45.547	1.2059	1.9475
830.996	45.548	1.2059	1.9475
840.996	45.548	1.2059	1.9475
850.996	45.549	1.2059	1.9475
860.996	45.549	1.2059	1.9475
870.996	45.549	1.2059	1.9475
880.996	45.549	1.2059	1.9475
890.996	45.549	1.2059	1.9475
895.996	45.549	1.2059	1.9475
898.496	45.549	1.2059	1.9475
899.746	45.549	1.2059	1.9475
900.746	44.971	1.2031	1.927
901.746	44.166	1.1991	1.8983
903.746	42.625	1.1912	1.8428
906.639	40.548	1.1797	1.767
909.59	38.608	1.1681	1.6951
912.574	36.818	1.1565	1.6277
915.596	35.169	1.1451	1.5649
918.656	33.657	1.1338	1.5065
921.764	32.27	1.1227	1.4524
924.924	31.003	1.112	1.4024
928.142	29.849	1.1016	1.3564
931.427	28.799	1.0916	1.3143
934.79	27.847	1.0821	1.2757
938.237	26.987	1.073	1.2406
941.777	26.212	1.0645	1.2088
945.423	25.517	1.0566	1.18
949.186	24.895	1.0492	1.1542
953.08	24.342	1.0424	1.1311
957.116	23.853	1.0362	1.1106
961.316	23.422	1.0306	1.0925
965.696	23.045	1.0256	1.0765
970.277	22.716	1.0211	1.0626
975.082	22.433	1.0172	1.0506
980.138	22.19	1.0138	1.0403
985.477	21.984	1.0108	1.0315
991.136	21.811	1.0083	1.0241
997.16	21.668	1.0062	1.018
1003.6	21.55	1.0045	1.0129
1010.52	21.455	1.0031	1.0089
1018	21.379	1.002	1.0056
1026.14	21.32	1.0011	1.0031
1035.08	21.275	1.0004	1.0012
1044.97	21.242	0.9999	0.9998
1054.97	21.221	0.9996	0.9988
1064.97	21.206	0.9994	0.9982
1074.97	21.197	0.9992	0.9978
1084.97	21.191	0.9991	0.9976
1094.97	21.187	0.9991	0.9974
1104.97	21.185	0.9991	0.9973
1114.97	21.183	0.999	0.9972
1124.97	21.182	0.999	0.9972
1134.97	21.182	0.999	0.9972
1144.97	21.181	0.999	0.9971
1154.97	21.181	0.999	0.9971
1164.97	21.181	0.999	0.9971
1174.97	21.181	0.999	0.9971
1184.97	21.18	0.999	0.9971
1194.97	21.18	0.999	0.9971
1199.97	21.18	0.999	0.9971
1200.97	21.381	2.004	1.0057
1201.97	21.646	2.0118	1.0171
1203.97	22.121	2.0256	1.0374
1206.54	22.641	2.0402	1.0594
1209.24	23.093	2.0525	1.0786
1212.06	23.482	2.0628	1.095
1215.03	23.817	2.0715	1.1091
1218.15	24.104	2.0788	1.1211
1221.44	24.347	2.0849	1.1313
1224.93	24.551	2.09	1.1399
1228.64	24.722	2.0942	1.147
1232.6	24.863	2.0976	1.1529
1236.84	24.978	2.1004	1.1576
1241.42	25.07	2.1026	1.1615
1246.37	25.143	2.1043	1.1645
1251.77	25.199	2.1057	1.1669
1257.71	25.242	2.1067	1.1686
1264.3	25.273	2.1074	1.1699
1271.7	25.296	2.1079	1.1709
1280.14	25.311	2.1083	1.1715
1289.93	25.32	2.1085	1.1719
1299.93	25.325	2.1087	1.1721
1309.93	25.328	2.1087	1.1722
1319.93	25.329	2.1087	1.1723
1329.93	25.33	2.1088	1.1723
1339.93	25.33	2.1088	1.1723
1349.93	25.33	2.1088	1.1723
1359.93	25.331	2.1088	1.1723
1369.93	25.331	2.1088	1.1723
1379.93	25.331	2.1088	1.1723
1389.93	25.331	2.1088	1.1723
1399.93	25.331	2.1088	1.1723
1409.93	25.331	2.1088	1.1723
1419.93	25.331	2.1088	1.1723
1429.93	25.331	2.1088	1.1723
1439.93	25.331	2.1088	1.1723
1449.93	25.331	2.1088	1.1723
1459.93	25.331	2.1088	1.1723
1469.93	25.331	2.1088	1.1723
1479.93	25.331	2.1088	1.1723
1489.93	25.331	2.1088	1.1723
1499.93	25.331	2.1088	1.1723
1500.93	25.213	1.053	1.1674
1501.93	25.051	1.0511	1.1607
1503.93	24.744	1.0474	1.1479
1507.8	24.216	1.0408	1.1259
1511.88	23.742	1.0348	1.1059
1516.12	23.324	1.0293	1.0884
1520.55	22.959	1.0244	1.0729
1525.18	22.643	1.0201	1.0595
1530.04	22.37	1.0163	1.0479
1535.17	22.136	1.013	1.038
1540.58	21.939	1.0102	1.0296
1546.32	21.773	1.0078	1.0225
1552.44	21.636	1.0058	1.0167
1559	21.524	1.0041	1.0119
1566.05	21.434	1.0028	1.008
1573.68	21.363	1.0017	1.0049
1582	21.308	1.0009	1.0026
1591.15	21.266	1.0003	1.0008
1601.15	21.236	0.9998	0.9995
1611.15	21.217	0.9995	0.9987
1621.15	21.204	0.9993	0.9981
1631.15	21.196	0.9992	0.9978
1641.15	21.19	0.9991	0.9975
1651.15	21.187	0.9991	0.9974
1661.15	21.184	0.999	0.9973
1671.15	21.183	0.999	0.9972
1681.15	21.182	0.999	0.9972
1691.15	21.181	0.999	0.9972
1701.15	21.181	0.999	0.9971
1711.15	21.181	0.999	0.9971
1721.15	21.181	0.999	0.9971
1731.15	21.181	0.999	0.9971
1741.15	21.18	0.999	0.9971
1751.15	21.18	0.999	0.9971
1761.15	21.18	0.999	0.9971
1771.15	21.18	0.999	0.9971
1781.15	21.18	0.999	0.9971
1791.15	21.18	0.999	0.9971
1800	21.18	0.999	0.9971

## Sheet: 3F
				MPC dosage to pyruvate mito correspondence (upper bar)
relative MPC dosage	PDH (Dflux/DMPC)	PC (Dflux/DMPC)		relative MPC dosage	pyruvate mito (mM)
0.003125	0.9991	1.0025		0.003125	0.0341
0.0033508	0.9992	1.0027		0.0033508	0.0366
0.003593	0.999	1.0033		0.003593	0.0393
0.0038527	0.9992	1.0033		0.0038527	0.0421
0.0041311	0.9989	1.0031		0.0041311	0.0452
0.0044296	0.9986	1.0032		0.0044296	0.0484
0.0047497	0.9977	1.0024		0.0047497	0.0519
0.005093	0.9986	1.0039		0.005093	0.0557
0.005461	0.9991	1.0047		0.005461	0.0598
0.0058557	0.9982	1.0045		0.0058557	0.0641
0.0062788	0.9989	1.0051		0.0062788	0.0688
0.0067326	0.999	1.0055		0.0067326	0.0738
0.0072192	0.9991	1.0067		0.0072192	0.0791
0.0077409	0.998	1.0065		0.0077409	0.0849
0.0083003	0.9979	1.0066		0.0083003	0.0911
0.0089001	0.9982	1.0071		0.0089001	0.0977
0.0095433	0.9979	1.0079		0.0095433	0.1048
0.0102	0.9982	1.0089		0.0102	0.1124
0.011	0.9973	1.0089		0.011	0.1206
0.0118	0.9969	1.0093		0.0118	0.1294
0.0126	0.9961	1.0093		0.0126	0.1389
0.0135	0.9965	1.0108		0.0135	0.149
0.0145	0.9968	1.0117		0.0145	0.1599
0.0156	0.9966	1.0126		0.0156	0.1717
0.0167	0.9954	1.0129		0.0167	0.1842
0.0179	0.9955	1.0144		0.0179	0.1978
0.0192	0.9955	1.0162		0.0192	0.2123
0.0206	0.9962	1.0172		0.0206	0.2279
0.022	0.9947	1.018		0.022	0.2447
0.0236	0.994	1.0191		0.0236	0.2627
0.0253	0.9932	1.0202		0.0253	0.282
0.0272	0.9931	1.0219		0.0272	0.3029
0.0291	0.9922	1.0232		0.0291	0.3253
0.0313	0.9921	1.0251		0.0313	0.3494
0.0335	0.9917	1.0269		0.0335	0.3754
0.0359	0.9899	1.0278		0.0359	0.4034
0.0385	0.9894	1.0304		0.0385	0.4335
0.0413	0.9891	1.0329		0.0413	0.4659
0.0443	0.9892	1.0363		0.0443	0.5008
0.0475	0.9863	1.0369		0.0475	0.5385
0.0509	0.9867	1.0413		0.0509	0.5791
0.0546	0.9855	1.0437		0.0546	0.6229
0.0586	0.9841	1.0468		0.0586	0.6701
0.0628	0.9835	1.0509		0.0628	0.7212
0.0673	0.9818	1.0533		0.0673	0.7763
0.0722	0.9792	1.0575		0.0722	0.8359
0.0774	0.9785	1.0619		0.0774	0.9003
0.083	0.9753	1.0659		0.083	0.9699
0.089	0.9743	1.0708		0.089	1.0454
0.0954	0.9713	1.0757		0.0954	1.1281
0.1023	0.9703	1.0822		0.1023	1.2168
0.1097	0.9672	1.0878		0.1097	1.313
0.1177	0.9644	1.0945		0.1177	1.4175
0.1262	0.9611	1.1007		0.1262	1.5312
0.1353	0.9578	1.1083		0.1353	1.6548
0.145	0.9543	1.1162		0.145	1.7894
0.1555	0.9509	1.1253		0.1555	1.9361
0.1668	0.9458	1.1334		0.1668	2.0963
0.1788	0.9404	1.142		0.1788	2.2713
0.1917	0.9353	1.1524		0.1917	2.4628
0.2056	0.9294	1.164		0.2056	2.6725
0.2205	0.9219	1.1736		0.2205	2.9026
0.2364	0.9146	1.1862		0.2364	3.1554
0.2535	0.9066	1.1995		0.2535	3.4334
0.2718	0.8961	1.2112		0.2718	3.7397
0.2914	0.8867	1.2258		0.2914	4.0777
0.3125	0.8754	1.2396		0.3125	4.4512
0.3351	0.8616	1.2528		0.3351	4.8643
0.3593	0.8473	1.2673		0.3593	5.3221
0.3853	0.8315	1.2807		0.3853	5.8066
0.4131	0.8135	1.2939		0.4131	6.3679
0.443	0.7937	1.3068		0.443	6.9915
0.475	0.7711	1.318		0.475	7.6848
0.5093	0.7467	1.3274		0.5093	8.4556
0.5461	0.7198	1.3338		0.5461	9.3121
0.5856	0.6906	1.3371		0.5856	10.2626
0.6279	0.6591	1.3362		0.6279	11.3158
0.6733	0.625	1.3295		0.6733	12.48
0.7219	0.5899	1.3193		0.7219	13.7626
0.7741	0.5541	1.3048		0.7741	15.1698
0.83	0.5158	1.2804		0.83	16.7062
0.89	0.4786	1.2531		0.89	18.3751
0.9543	0.4411	1.2191		0.9543	20.1769
1.0233	0.4045	1.1807		1.0233	22.1101
1.0972	0.3695	1.1383		1.0972	24.1709
1.1765	0.3369	1.0928		1.1765	26.3535
1.2616	0.3046	1.0427		1.2616	28.6496
1.3527	0.2767	0.9953		1.3527	31.0516
1.4505	0.2495	0.9454		1.4505	33.5483
1.5553	0.2222	0.8866		1.5553	36.5651
1.6677	0.2001	0.8381		1.6677	39.2293
1.7882	0.1822	0.7921		1.7882	41.953
1.9175	0.1642	0.7453		1.9175	44.7239
2.056	0.1475	0.7014		2.056	47.5313
2.2046	0.1347	0.6596		2.2046	50.3641
2.3639	0.1213	0.6193		2.3639	53.2112
2.5348	0.1099	0.5819		2.5348	56.0627
2.718	0.1003	0.5463		2.718	58.9091
2.9144	0.0909	0.513		2.9144	61.7409
3.125	0.0841	0.4806		3.125	64.5491

## Sheet: 3G
Time (s)	pyruvate mito (mM)	relative PDH flux	relative PC flux		Pulses	Time (s)
-115.758	21.18	0.999	0.9971		start increased pyruvate cyto	0
-105.758	21.18	0.999	0.9971		end increased pyruvate cyto	300
-95.7577	21.18	0.999	0.9971		start MPC activation	600
-85.7577	21.18	0.999	0.9971		end MPC activation	900
-75.7577	21.18	0.999	0.9971		start both	1200
-65.7577	21.18	0.999	0.9971		end both	1500
-55.7577	21.18	0.999	0.9971
-45.7577	21.18	0.999	0.9971
-35.7577	21.18	0.999	0.9971
-25.7577	21.18	0.999	0.9971
-15.7577	21.18	0.999	0.9971
-5.7577	21.18	0.999	0.9971
-0.7577	21.18	0.999	0.9971
0.2423	21.336	1.0013	1.0038
1.2423	22.363	1.0162	1.0476
2.2423	23.337	1.0295	1.0889
3.2423	24.268	1.0415	1.128
4.2423	25.161	1.0524	1.1653
5.2423	26.017	1.0623	1.2007
6.5028	27.048	1.0737	1.2431
8.8653	28.847	1.0921	1.3162
13.1239	31.706	1.118	1.4302
17.9544	34.454	1.1398	1.5374
22.388	36.598	1.155	1.6194
26.7913	38.43	1.167	1.6884
31.1644	40.003	1.1765	1.7469
35.6066	41.389	1.1845	1.7978
40.1717	42.623	1.1912	1.8427
44.8751	43.723	1.1969	1.8824
49.7059	44.699	1.2018	1.9173
54.7178	45.569	1.206	1.9483
59.9158	46.343	1.2096	1.9756
65.3342	47.032	1.2128	1.9998
70.9652	47.639	1.2155	2.021
76.8375	48.174	1.2178	2.0396
82.9758	48.642	1.2199	2.0558
89.3965	49.051	1.2216	2.07
96.1372	49.405	1.2231	2.0822
103.215	49.709	1.2243	2.0926
110.678	49.97	1.2254	2.1016
118.58	50.191	1.2263	2.1091
126.959	50.377	1.2271	2.1155
135.873	50.532	1.2277	2.1208
145.395	50.658	1.2282	2.1251
155.395	50.759	1.2286	2.1285
165.395	50.835	1.2289	2.1311
175.395	50.892	1.2291	2.1331
185.395	50.935	1.2293	2.1345
195.395	50.968	1.2294	2.1356
205.395	50.992	1.2295	2.1365
215.395	51.01	1.2296	2.1371
225.395	51.024	1.2296	2.1376
235.395	51.034	1.2297	2.1379
245.395	51.042	1.2297	2.1382
255.395	51.048	1.2297	2.1384
265.395	51.053	1.2298	2.1385
275.395	51.056	1.2298	2.1386
285.395	51.058	1.2298	2.1387
295.395	51.06	1.2298	2.1388
297.895	51.061	1.2298	2.1388
299.145	51.061	1.2298	2.1388
300.145	50.951	1.2294	2.1351
301.145	49.972	1.2254	2.1016
302.145	49.029	1.2215	2.0692
303.145	48.113	1.2176	2.0375
304.145	47.222	1.2136	2.0064
305.145	46.356	1.2097	1.976
306.452	45.259	1.2045	1.9372
308.899	43.311	1.1948	1.8676
311.791	41.179	1.1833	1.7901
314.733	39.191	1.1717	1.7168
317.708	37.354	1.1601	1.648
320.719	35.662	1.1486	1.5838
323.767	34.108	1.1372	1.524
326.861	32.683	1.1261	1.4686
330.004	31.38	1.1152	1.4173
333.206	30.191	1.1047	1.3701
336.473	29.109	1.0946	1.3268
339.811	28.128	1.0849	1.2871
343.23	27.241	1.0757	1.251
346.74	26.44	1.0671	1.2182
350.351	25.722	1.0589	1.1885
354.076	25.078	1.0514	1.1618
357.928	24.505	1.0444	1.1379
361.92	23.997	1.0381	1.1166
366.068	23.548	1.0323	1.0978
370.391	23.155	1.0271	1.0812
374.908	22.812	1.0224	1.0667
379.642	22.515	1.0183	1.0541
384.619	22.261	1.0148	1.0433
389.868	22.044	1.0117	1.0341
395.425	21.861	1.0091	1.0263
401.333	21.709	1.0068	1.0197
407.638	21.583	1.005	1.0144
414.404	21.482	1.0035	1.01
421.702	21.4	1.0023	1.0065
429.63	21.337	1.0013	1.0038
438.304	21.288	1.0006	1.0017
447.881	21.251	1.0001	1.0002
457.881	21.226	0.9997	0.9991
467.881	21.21	0.9994	0.9984
477.881	21.2	0.9993	0.9979
487.881	21.193	0.9992	0.9976
497.881	21.189	0.9991	0.9975
507.881	21.186	0.9991	0.9973
517.881	21.184	0.999	0.9972
527.881	21.183	0.999	0.9972
537.881	21.182	0.999	0.9972
547.881	21.181	0.999	0.9971
557.881	21.181	0.999	0.9971
567.881	21.181	0.999	0.9971
577.881	21.181	0.999	0.9971
587.881	21.18	0.999	0.9971
597.881	21.18	0.999	0.9971
599.131	21.18	0.999	0.9971
600.131	21.33	1.0012	1.0035
601.131	22.486	1.0179	1.0529
602.756	24.226	1.041	1.1263
605.636	26.946	1.0726	1.2389
608.981	29.62	1.0995	1.3473
612.06	31.706	1.118	1.4302
615.117	33.484	1.1324	1.4998
618.159	35.01	1.1439	1.5588
621.242	36.348	1.1533	1.6099
624.407	37.536	1.1613	1.6549
627.659	38.59	1.168	1.6944
631.018	39.528	1.1737	1.7293
634.503	40.363	1.1786	1.7602
638.117	41.104	1.1829	1.7874
641.875	41.76	1.1865	1.8114
645.793	42.339	1.1897	1.8324
649.882	42.847	1.1924	1.8508
654.157	43.292	1.1947	1.8669
658.634	43.678	1.1967	1.8808
663.336	44.013	1.1984	1.8928
668.289	44.3	1.1998	1.9031
673.513	44.545	1.201	1.9118
679.048	44.752	1.202	1.9192
684.928	44.925	1.2029	1.9254
691.197	45.068	1.2036	1.9305
697.914	45.185	1.2042	1.9346
705.142	45.28	1.2046	1.938
712.963	45.354	1.205	1.9406
721.488	45.412	1.2052	1.9427
730.849	45.457	1.2055	1.9443
740.849	45.488	1.2056	1.9454
750.849	45.509	1.2057	1.9461
760.849	45.523	1.2058	1.9466
770.849	45.532	1.2058	1.9469
780.849	45.538	1.2058	1.9471
790.849	45.542	1.2059	1.9473
800.849	45.544	1.2059	1.9474
810.849	45.546	1.2059	1.9474
820.849	45.547	1.2059	1.9475
830.849	45.548	1.2059	1.9475
840.849	45.548	1.2059	1.9475
850.849	45.549	1.2059	1.9475
860.849	45.549	1.2059	1.9475
870.849	45.549	1.2059	1.9475
880.849	45.549	1.2059	1.9475
890.849	45.549	1.2059	1.9475
895.849	45.549	1.2059	1.9475
898.349	45.549	1.2059	1.9475
899.599	45.549	1.2059	1.9475
900.599	44.971	1.2031	1.927
901.599	44.166	1.1991	1.8983
903.599	42.625	1.1912	1.8428
906.491	40.549	1.1797	1.767
909.442	38.609	1.1681	1.6951
912.426	36.818	1.1565	1.6277
915.45	35.169	1.1451	1.5649
918.513	33.655	1.1338	1.5064
921.619	32.269	1.1227	1.4524
924.778	31.003	1.112	1.4024
927.999	29.848	1.1016	1.3564
931.285	28.798	1.0916	1.3142
934.648	27.846	1.0821	1.2756
938.094	26.986	1.073	1.2406
941.633	26.211	1.0645	1.2087
945.278	25.516	1.0566	1.18
949.041	24.895	1.0492	1.1542
952.935	24.342	1.0424	1.1311
956.974	23.853	1.0362	1.1106
961.175	23.421	1.0306	1.0925
965.555	23.044	1.0256	1.0765
970.135	22.716	1.0211	1.0626
974.939	22.433	1.0172	1.0506
979.994	22.19	1.0138	1.0403
985.335	21.984	1.0108	1.0315
990.994	21.811	1.0083	1.0241
997.019	21.668	1.0062	1.018
1003.46	21.55	1.0045	1.0129
1010.38	21.455	1.0031	1.0089
1017.86	21.379	1.002	1.0056
1026	21.32	1.0011	1.0031
1034.94	21.275	1.0004	1.0012
1044.83	21.242	0.9999	0.9998
1054.83	21.221	0.9996	0.9988
1064.83	21.206	0.9994	0.9982
1074.83	21.197	0.9992	0.9978
1084.83	21.191	0.9991	0.9976
1094.83	21.187	0.9991	0.9974
1104.83	21.185	0.9991	0.9973
1114.83	21.183	0.999	0.9972
1124.83	21.182	0.999	0.9972
1134.83	21.182	0.999	0.9972
1144.83	21.181	0.999	0.9971
1154.83	21.181	0.999	0.9971
1164.83	21.181	0.999	0.9971
1174.83	21.181	0.999	0.9971
1184.83	21.18	0.999	0.9971
1194.83	21.18	0.999	0.9971
1199.83	21.18	0.999	0.9971
1200.83	22.806	1.0224	1.0665
1201.83	25.883	1.0608	1.1952
1202.83	28.795	1.0916	1.3141
1203.83	31.55	1.1167	1.4241
1204.83	34.161	1.1376	1.526
1205.83	36.638	1.1553	1.6209
1207.03	39.452	1.1733	1.7265
1208.65	43.003	1.1932	1.8565
1210.59	46.911	1.2122	1.9955
1212.89	51.113	1.23	2.1406
1215.71	55.733	1.2469	2.2949
1219.59	61.279	1.2643	2.4736
1223.17	65.684	1.2763	2.6105
1226.65	69.43	1.2855	2.7237
1230.11	72.716	1.2928	2.8205
1233.59	75.624	1.2989	2.9045
1237.11	78.236	1.304	2.9785
1240.67	80.57	1.3083	3.0435
1244.33	82.695	1.312	3.1019
1248.09	84.63	1.3152	3.1543
1251.95	86.378	1.3181	3.2011
1255.9	87.959	1.3205	3.2429
1259.97	89.392	1.3227	3.2805
1264.19	90.694	1.3246	3.3143
1268.53	91.868	1.3263	3.3446
1273.04	92.928	1.3278	3.3717
1277.71	93.885	1.3291	3.3961
1282.57	94.743	1.3302	3.4177
1287.61	95.511	1.3313	3.4371
1292.85	96.193	1.3322	3.4541
1298.3	96.797	1.3329	3.4692
1303.99	97.332	1.3336	3.4825
1309.94	97.802	1.3342	3.4941
1316.16	98.211	1.3347	3.5043
1322.68	98.567	1.3352	3.513
1329.54	98.874	1.3356	3.5206
1336.77	99.137	1.3359	3.527
1344.41	99.361	1.3362	3.5325
1352.52	99.549	1.3364	3.5371
1361.15	99.705	1.3366	3.5409
1370.37	99.834	1.3367	3.5441
1380.29	99.939	1.3369	3.5466
1390.29	100.02	1.337	3.5486
1400.29	100.08	1.337	3.55
1410.29	100.12	1.3371	3.5511
1420.29	100.15	1.3371	3.5519
1430.29	100.18	1.3372	3.5525
1440.29	100.2	1.3372	3.5529
1450.29	100.21	1.3372	3.5532
1460.29	100.22	1.3372	3.5535
1470.29	100.23	1.3372	3.5537
1480.29	100.23	1.3372	3.5538
1490.29	100.24	1.3372	3.5539
1495.29	100.24	1.3372	3.554
1497.79	100.24	1.3372	3.554
1499.04	100.24	1.3372	3.554
1500.04	99.896	1.3368	3.5456
1501.04	97.897	1.3343	3.4965
1502.04	95.944	1.3318	3.4479
1503.04	94.028	1.3293	3.3997
1504.04	92.145	1.3267	3.3517
1505.04	90.296	1.324	3.304
1506.26	88.087	1.3207	3.2463
1508.34	84.428	1.3149	3.1489
1511.14	79.737	1.3068	3.0204
1513.99	75.205	1.298	2.8925
1516.85	70.929	1.2889	2.7681
1519.71	66.904	1.2794	2.6477
1522.57	63.131	1.2695	2.5317
1525.42	59.599	1.2593	2.4202
1528.27	56.304	1.2488	2.3137
1531.13	53.228	1.238	2.2119
1534	50.362	1.227	2.115
1536.87	47.695	1.2157	2.0229
1539.76	45.221	1.2043	1.9359
1542.67	42.925	1.1928	1.8536
1545.6	40.799	1.1811	1.7762
1548.55	38.835	1.1695	1.7035
1551.54	37.024	1.1579	1.6356
1554.55	35.359	1.1464	1.5722
1557.61	33.831	1.1351	1.5133
1560.71	32.429	1.124	1.4586
1563.87	31.147	1.1132	1.4081
1567.08	29.979	1.1028	1.3616
1570.36	28.917	1.0927	1.319
1573.71	27.954	1.0832	1.28
1577.15	27.083	1.0741	1.2445
1580.68	26.299	1.0655	1.2123
1584.31	25.595	1.0575	1.1833
1588.05	24.965	1.05	1.1571
1591.93	24.405	1.0432	1.1337
1595.95	23.908	1.0369	1.1129
1600.13	23.47	1.0313	1.0945
1604.49	23.086	1.0262	1.0783
1609.04	22.753	1.0216	1.0642
1613.82	22.464	1.0176	1.0519
1618.85	22.217	1.0142	1.0414
1624.15	22.007	1.0112	1.0325
1629.77	21.83	1.0086	1.0249
1635.75	21.683	1.0065	1.0187
1642.13	21.562	1.0047	1.0135
1648.99	21.465	1.0032	1.0093
1656.4	21.387	1.0021	1.006
1664.46	21.326	1.0012	1.0034
1673.29	21.28	1.0005	1.0014
1683.06	21.246	1	0.9999
1693.06	21.223	0.9996	0.9989
1703.06	21.208	0.9994	0.9983
1713.06	21.198	0.9992	0.9979
1723.06	21.192	0.9992	0.9976
1733.06	21.188	0.9991	0.9974
1743.06	21.185	0.9991	0.9973
1753.06	21.183	0.999	0.9972
1763.06	21.182	0.999	0.9972
1773.06	21.181	0.999	0.9972
1783.06	21.181	0.999	0.9971
1793.06	21.181	0.999	0.9971
1800	21.181	0.999	0.9971
