# Supplementary material for: A highly responsive pyruvate sensor reveals pathway-regulatory role of the mitochondrial pyruvate carrier MPC
Source: eLife. 2020 Mar 6;9:e53917. doi: 10.7554/eLife.53917 (PMC7077990; doi:10.7554/eLife.53917)
Supplement: Figure 4—source data 1. [file elife-53917-fig4-data1.xlsx]

## Sheet: 4A
Representative pulse							Box graph			Time (min)	mitoPyronicSF	mito-mCherry
Time (min)	mito-PyronicSF (% of steady state fluorescence)		Pulses	Time (min)			X axis position	mito-PyronicSF (% of steady state fluorescence)		0.166667	1292971	2035366
0.1667	-2.5842		start pyruvate 5mM	3.1667			1.73	61.9541		0.333333	1283319	2020083
0.3333	-2.5758		end pyruvate 5mM	22.5			1.68	68.1058		0.5	1279014	2003778
0.5	-1.664						1.68	71.9644		0.666667	1301937	2011655
0.6667	1.0211		start UK-5099	15.6667			1.68	57.4018		0.833333	1266559	1963336
0.8333	0.3899		end UK-5099	22.5			1.68	66.5486		1	1321902	2032578
1	1.975						1.8	71.5511		1.16667	1264063	1968580
1.1667	-0.5116						1.7	71.6218		1.33333	1290794	1998160
1.3333	0.6572						1.75	54.8364		1.5	1284527	2009075
1.5	-1.3437						1.71	23.1595		1.66667	1255523	1971430
1.6667	-2.0993						1.77	17.191		1.83333	1258787	1915793
1.8333	3.9975						1.68	11.0855		2	1277567	1997523
2	-1.2793						1.73	19.7399		2.16667	1284969	2036112
2.1667	-3.8407						1.67	53.2608		2.33333	1240033	1917877
2.3333	0.8305						1.77	64.4463		2.5	1293638	2029593
2.5	-1.9396						1.6	61.5883		2.66667	1308773	2065437
2.6667	-3.0666						1.62	53.5412		2.83333	1258546	1959880
2.8333	-0.5009						1.71	54.3756		3	1272713	1942460
3	3.4388						1.69	24.4944		3.16667	1262379	1915534
3.1667	4.5904						1.65	64.5861		3.33333	1276479	1945334
3.3333	3.7309						1.61	53.017		3.5	1294699	1964436
3.5	4.6046						1.78	58.2203		3.66667	1367885	1950701
3.6667	17.3296						1.64	43.3094		3.83333	1407034	1905262
3.8333	28.5796						1.77	75.9904		4	1442551	1893394
4	35.6388						1.66	61.8073		4.16667	1482830	1934687
4.1667	37.0146						1.67	67.5585		4.33333	1495984	1852559
4.3333	49.4137						1.6	54.2544		4.5	1521798	1913833
4.5	45.6812						1.64	73.6591		4.66667	1614286	1975348
4.6667	52.3394						1.68	75.8832		4.83333	1534026	1872675
4.8333	52.927						1.69	76.7959		5	1627986	1951187
5	57.5131									5.16667	1606982	1937917
5.1667	55.9661									5.33333	1654503	1940080
5.3333	63.0804									5.5	1629511	1921018
5.5	61.7078									5.66667	1635283	1930535
5.6667	61.3481									5.83333	1725612	1992383
5.8333	67.0958									6	1722387	1957345
6	71.2782									6.16667	1796389	2027236
6.1667	73.1394									6.33333	1738039	1951262
6.3333	74.5274									6.5	1780291	2011829
6.5	72.7725									6.66667	1663945	1829553
6.6667	80.1887									6.83333	1757991	1981931
6.8333	73.4056									7	1824059	2025605
7	77.4779									7.16667	1745484	1946923
7.1667	76.2808									7.33333	1768379	1890233
7.3333	88.0526									7.5	1799492	1915381
7.5	89.248									7.66667	1762363	1889932
7.6667	87.1367									7.83333	1756291	1878113
7.8333	87.9321									8	1886984	2018370
8	87.8624									8.16667	1734874	1866910
8.1667	86.1633									8.33333	1675974	1794858
8.3333	87.5181									8.5	1706071	1757085
8.5	98.7472									8.66667	1791093	1885818
8.6667	92.3492									8.83333	1784845	1867447
8.8333	94.1595									9	1750536	1794321
9	100.145									9.16667	1782301	1887493
9.1667	90.6888									9.33333	1776461	1866008
9.3333	93.0258									9.5	1842238	1887348
9.5	100.296									9.66667	1798525	1836134
9.6667	101.328									9.83333	1759496	1828091
9.8333	96.1848									10	1709199	1776883
10	96.0131									10.1667	1786162	1847750
10.1667	97.4499									10.3333	1814939	1857304
10.3333	100.626									10.5	1781580	1849331
10.5	96.4526									10.6667	1747988	1808783
10.6667	97.3655									10.8333	1880793	1930753
10.8333	99.7003									11	1890121	1941224
11	99.5647									11.1667	1788375	1828239
11.1667	100.929									11.3333	1818135	1876807
11.3333	98.0746									11.5	1828284	1842174
11.5	105.235									11.6667	1846845	1898853
11.6667	99.2435									11.8333	1814349	1869934
11.8333	98.5383									12	1763814	1834589
12	95.8662									12.1667	1847930	1894799
12.1667	100.044									12.3333	1756908	1804143
12.3333	99.608									12.5	1776862	1832807
12.5	98.2972									12.6667	1738945	1816581
12.6667	94.6108									12.8333	1796203	1832703
12.8333	101.499									13	1886258	1916529
13	102.743									13.1667	1879008	1883368
13.1667	106.812									13.3333	1840821	1905463
13.3333	97.2709									13.5	1824923	1846501
13.5	103.983									13.6667	1870143	1916697
13.6667	100.179									13.8333	1865372	1892819
13.8333	103.134									14	1840655	1934331
14	92.8931									14.1667	1824108	1895605
14.1667	96.1261									14.3333	1727322	1758500
14.3333	102.159									14.5	1816213	1856025
14.5	101.036									14.6667	1835948	1884377
14.6667	99.7533									14.8333	1781355	1820584
14.8333	101.007									15	1775617	1805844
15	102.458									15.1667	1773268	1852325
15.1667	94.6282									15.3333	1706086	1792321
15.3333	92.9881									15.5	1711278	1726622
15.5	104.828									15.6667	1721000	1738158
15.6667	104.531									15.8333	1723809	1759415
15.8333	101.402									16	1731773	1766346
16	101.603									16.1667	1650314	1719647
16.1667	95.341									16.3333	1648998	1762987
16.3333	87.9947									16.5	1562139	1668764
16.5	88.2248									16.6667	1602418	1761030
16.6667	80.3247									16.8333	1509943	1689676
16.8333	75.4037									17	1597483	1742439
17	82.4002									17.1667	1538840	1747006
17.1667	71.5448									17.3333	1516877	1683287
17.3333	77.6708									17.5	1498249	1741385
17.5	65.3673									17.6667	1483724	1719975
17.6667	66.0509									17.8333	1457413	1709375
17.8333	63.0196									18	1485693	1731940
18	64.5953									18.1667	1474657	1734417
18.1667	62.3049									18.3333	1543982	1796237
18.3333	65.1219									18.5	1473969	1718298
18.5	64.5915									18.6667	1457461	1767400
18.6667	54.5789									18.8333	1508329	1799266
18.8333	58.7041									19	1479633	1773515
19	57.4942									19.1667	1525300	1814774
19.1667	59.3645									19.3333	1439163	1710354
19.3333	59.6516									19.5	1510001	1792614
19.5	59.9245									19.6667	1458237	1706321
19.6667	63.626									19.8333	1499865	1792128
19.8333	58.2863									20	1430544	1720533
20	56.6369									20.1667	1456274	1756327
20.1667	55.9442									20.3333	1466441	1761770
20.3333	56.9128									20.5	1436873	1753306
20.5	53.0354									20.6667	1457051	1708866
20.6667	63.0323									20.8333	1464302	1770406
20.8333	55.3226									21	1446894	1719968
21	59.5887									21.1667	1426256	1669039
21.1667	63.6044									21.3333	1457085	1728177
21.3333	60.1625									21.5	1491166	1791038
21.5	56.9741									21.6667	1429854	1704320
21.6667	58.9021									21.8333	1419723	1759056
21.8333	49.2841									22	1453462	1739240
22	57.9149									22.1667	1464518	1747771
22.1667	58.5931									22.3333	1455959	1736276
22.3333	58.7796									22.5	1460065	1757154
22.5	56.4776

## Sheet: 4B
Time (min)	mito-PyronicSF/mCherry (%)		Slope #1				Slope #2				Slope #3				Paired pulses (bottom panel)	pyruvate consumption (%/min) Cell 1	pyruvate consumption (%/min) Cell 2	pyruvate consumption (%/min) Cell 3	pyruvate consumption (%/min) Cell 4	pyruvate consumption (%/min) Cell 5	pyruvate consumption (%/min) Cell 6	pyruvate consumption (%/min) Cell 7	pyruvate consumption (%/min) Cell 8	pyruvate consumption (%/min) Cell 9	pyruvate consumption (%/min) Cell 10		Time (min)	mitoPyronicSF	mito-mCherry
0	37.53		Time (min)	slope points (black circles)			Time (min)	slope points (black circles)			Time (min)	slope points (black circles)			#1 UK pulse	32.6372	27.4544	32.4279	17.3396	11.9504	28.5502	26.9609	58.6784	20.4934	28.4992		0.166667	6590397	8658706
0.1667	36.23		2.8333	41.5			9	39.38			16.6667	30.81			#2 UK pulse	25.8475	12.7722	28.9422	15.872	4.5051	27.2359	21.5233	28.0805	15.5764	20.0395		0.333333	6627119	8747004
0.3333	37.88		3	38.79			9.1667	36.84			16.8333	23.37			#3 UK pulse	33.0139	23.1837	36.0818	18.2287	11.6671	15.3339	13.5314	25.813	24.9208	22.4194		0.5	6605523	8725526
0.5	37.77		3.1667	31.58			9.3333	32.27			17	17.82															0.666667	6547943	8710597
0.6667	35.12		3.3333	25.77			9.5	26.55			17.1667	14.31															0.833333	6558762	8718076
0.8333	38.73																										1	6559784	8612013
1	37.99																										1.16667	6578388	8752198
1.1667	40.03																										1.33333	6652363	8792305
1.3333	38.99		Time (min)	Slope regression (red line)			Time (min)	Slope regression (red line)			Time (min)	Slope regression (red line)															1.5	6547676	8698251
1.5	37.49		2.5	1.5286			8.4375	1.5443			16.0938	1.4906															1.66667	7269811	8698691
1.6667	38.41		2.6563	1.4785			8.5938	1.504			16.25	1.439															1.83333	7964111	8661998
1.8333	38.05		2.8125	1.4284			8.75	1.4638			16.4063	1.3875															2	8522916	8766194
2	36.2		2.9688	1.3782			8.9063	1.4235			16.5625	1.3359															2.16667	8834162	8747841
2.1667	38.37		3.125	1.3281			9.0625	1.3833			16.7188	1.2844															2.33333	9027134	8742668
2.3333	39.26		3.2813	1.278			9.2188	1.343			16.875	1.2328															2.5	9222761	8658342
2.5	40.06		3.4375	1.2279			9.375	1.3027			17.0313	1.1812															2.66667	9335070	8716115
2.6667	38.02		3.5938	1.1778			9.5313	1.2625			17.1875	1.1297															2.83333	9503928	8777186
2.8333	41.5		3.75	1.1276			9.6875	1.2222			17.3438	1.0781															3	9586317	8774866
3	38.79		3.9063	1.0775			9.8438	1.182			17.5	1.0265															3.16667	9665984	8905006
3.1667	31.58						10	1.1417			17.6563	0.975															3.33333	9752159	8854081
3.3333	25.77						10.1563	1.1015																			3.5	9794862	8915730
3.5	19.94						10.3125	1.0612																			3.66667	9888614	8934845
3.6667	19.85																										3.83333	9932164	8781500
3.8333	18.27																										4	9997745	8909213
4	18.6																										4.16667	9578627	8919476
4.1667	16.45		Pulses	Time (min)			Pulses	Time (min)			Pulses	Time (min)															4.33333	6654959	8976382
4.3333	16.84		start UK pulse 1	2.8333			start UK pulse 2	9			start UK pulse 3	16.6667															4.5	6227886	8991623
4.5	18.25		end UK pulse 1	3.3333			end UK pulse 2	9.5			end UK pulse 3	17.1667															4.66667	6230866	9078872
4.6667	19.59																										4.83333	6327035	9055656
4.8333	17.96																										5	6338836	8959689
5	22.18																										5.16667	6322794	9113813
5.1667	23.29																										5.33333	7103926	9158776
5.3333	23.99																										5.5	9066727	9307114
5.5	26.36																										5.66667	10069370	9349335
5.6667	25.91																										5.83333	10580321	9430349
5.8333	29.05																										6	10941265	9456457
6	31.71																										6.16667	11047887	9527090
6.1667	32.76																										6.33333	11146838	9396330
6.3333	32.59																										6.5	11178251	9373053
6.5	36.58																										6.66667	11213652	9486244
6.6667	36.43																										6.83333	11181520	9440857
6.8333	36.34																										7	11090984	9439760
7	38.69																										7.16667	10990108	9411174
7.1667	39.67																										7.33333	10922130	9636749
7.3333	40.96																										7.5	10821083	9499624
7.5	39.66																										7.66667	10708082	9638081
7.6667	40.04																										7.83333	10633632	9590014
7.8333	40.97																										8	10528513	9759936
8	39.58																										8.16667	10375157	9659607
8.1667	40.89																										8.33333	10141910	9668211
8.3333	40.32																										8.5	9872006	9656214
8.5	40.14																										8.66667	9728883	9738265
8.6667	40.69																										8.83333	9516816	9687927
8.8333	41.09																										9	9332926	9593604
9	39.38																										9.16667	9220396	9649748
9.1667	36.84																										9.33333	9206449	9685170
9.3333	32.27																										9.5	9128686	9539259
9.5	26.55																										9.66667	9083731	9733285
9.6667	23.08																										9.83333	9002782	9755311
9.8333	19.68																										10	9026392	9771575
10	16.75																										10.1667	8965861	9789635
10.1667	16.79																										10.3333	9009919	9731914
10.3333	17.07																										10.5	8973250	9698916
10.5	16.37																										10.6667	8954176	9848626
10.6667	16.33																										10.8333	8962560	9626995
10.8333	15.11																										11	8973164	9684595
11	17.87																										11.1667	9048335	9638192
11.1667	15.79																										11.3333	8989306	9639507
11.3333	18.42																										11.5	9010548	9757151
11.5	18.36																										11.6667	9008872	9697158
11.6667	19.51																										11.8333	9016873	9728307
11.8333	20.91																										12	9027987	9859597
12	20.86																										12.1667	9093203	9790303
12.1667	23.1																										12.3333	9141288	9785932
12.3333	23.36																										12.5	9134010	9728049
12.5	23.62																										12.6667	9055072	9771397
12.6667	27.7																										12.8333	9094289	9597012
12.8333	27.99																										13	8971935	9633575
13	28.29																										13.1667	8648023	9740011
13.1667	28.77																										13.3333	8249763	9671484
13.3333	28.84																										13.5	8096574	9903198
13.5	30.82																										13.6667	7986548	9772777
13.6667	32.73																										13.8333	7925063	9812426
13.8333	31.69																										14	7902095	9758947
14	33.71																										14.1667	7861395	9868835
14.1667	33.5																										14.3333	7884572	9868803
14.3333	33.12																										14.5	7940086	9832573
14.5	33.55																										14.6667	7960817	9759625
14.6667	32.63																										14.8333	8014653	9949236
14.8333	33.92																										15	8164905	9823282
15	32.55																										15.1667	8267249	9867075
15.1667	31.79																										15.3333	8332131	9895616
15.3333	32.65																										15.5	8460962	9880548
15.5	34.01																										15.6667	8552583	10020881
15.6667	34.78																										15.8333	8685928	9955313
15.8333	34.83																										16	8854461	9965396
16	35.26																										16.1667	8869098	9911065
16.1667	35.7																										16.3333	8923601	9983503
16.3333	33.25																										16.5	9092314	9904847
16.5	32.06																										16.6667	9178901	10009522
16.6667	30.81																										16.8333	9093926	9922387
16.8333	23.37																										17	9266102	9956450
17	17.82																										17.1667	9223970	9848766
17.1667	14.31																										17.3333	9325519	9874690
17.3333	14.4																										17.5	9392589	10029527
17.5	11.98																										17.6667	9339877	9948414
17.6667	11.73																										17.8333	9372818	9924194
17.8333	11.69																										18	9469832	10117420
18	12.59																										18.1667	9401413	9959744
18.1667	10.84																										18.3333	9461644	10060413
18.3333	12.72																										18.5	9454287	10064008
18.5	11.35																										18.6667	9460660	10035752
18.6667	14.21																										18.8333	9421663	9968585
18.8333	12.53																										19	9374344	10027809
19	15.09																										19.1667	9281172	10094497
19.1667	13.66																										19.3333	8957902	10044155
19.3333	16.39																										19.5	8581813	10010012
19.5	16.93																										19.6667	8491663	10154681
19.6667	19.58																										19.8333	8304980	10182596
19.8333	21.99																										20	8193885	10271521
20	23.37																										20.1667	8117514	10170534
20.1667	22.61																										20.3333	8081667	10102872
20.3333	24.59																										20.5	8045910	10111966
20.5	25.98																										20.6667	8052130	10123279
20.6667	25.75																										20.8333	8124778	10313842
20.8333	27.03																										21	8156402	10135522
21	27.43																										21.1667	8184862	10337222
21.1667	27.4																										21.3333	8269512	10235906
21.3333	28.83																										21.5	8302382	10282119
21.5	29.31																										21.6667	8454018	10382198
21.6667	30.55																										21.8333	8493563	10321823
21.8333	30.65																										22	8532539	10374321
22	29.91																										22.1667	8656420	10353285
22.1667	29.1																										22.3333	8760892	10459977
22.3333	30.9																										22.5	8818251	10509722
22.5	31.2																										22.6667	8925542	10330599
22.6667	29.94																										22.8333	9006380	10403855
22.8333	30.67																										23	9107637	10499372
23	30																										23.1667	9161334	10526491
23.1667	31.77																										23.3333	9118495	10471457
23.3333	29.42																										23.5	9268499	10499443
23.5	30.47																										23.6667	9371794	10478314
23.6667	31.37																										23.8333	9363398	10544186
23.8333	32.55																										24	9441574	10486752
																											24.1667	9413450	10470227
																											24.3333	9456405	10545624
																											24.5	9494573	10557308
																											24.6667	9446986	10570393
																											24.8333	9475426	10510136
																											25	9532475	10672651
																											25.1667	9443277	10627597
																											25.3333	9476648	10602763
																											25.5	9543578	10579223
																											25.6667	9593840	10579997
																											25.8333	9583640	10565575
																											26	9618517	10573374
																											26.1667	9632279	10557686
																											26.3333	9463695	10544325
																											26.5	9471202	10639332
																											26.6667	9358508	10603175
																											26.8333	8982257	10727914
																											27	8561159	10652492
																											27.1667	8409404	10751299
																											27.3333	8213112	10487211
																											27.5	8208801	10687136
																											27.6667	8162562	10646767
																											27.8333	8075278	10533614
																											28	8157529	10566934
																											28.1667	8093188	10631098
																											28.3333	8179433	10584328
																											28.5	8148297	10660463
																											28.6667	8243537	10543360
																											28.8333	8272054	10724042
																											29	8374118	10639810
																											29.1667	8418142	10818859
																											29.3333	8535464	10738831
																											29.5	8578580	10748366
																											29.6667	8698302	10681644
																											29.8333	8859130	10687019
																											30	8930379	10664563
																											30.1667	8998576	10807662
																											30.3333	9083007	10752781
																											30.5	9117866	10686232
																											30.6667	9203266	10805772
																											30.8333	9314208	10837303
																											31	9372753	10874522
																											31.1667	9392178	10899712
																											31.3333	9448927	10855957
																											31.5	9485018	10860798
																											31.6667	9514863	10800633
																											31.8333	9536149	10817452
																											32	9540490	10878874
																											32.1667	9528648	10927361
																											32.3333	9535290	10797748
																											32.5	9596003	10844523
																											32.6667	9505947	10836787
																											32.8333	9593940	10882088
																											33	9584149	10921879
																											33.1667	9624776	10834647
																											33.3333	9616884	11004662
																											33.5	9620957	10928630
																											33.6667	9777608	11038745
																											33.8333	9626081	10778270
																											34	8019414	10752891
																											34.1667	7158830	10746864
																											34.3333	7098282	10541248
																											34.5	7064225	10682129
																											34.6667	7005414	10618711
																											34.8333	7005134	10574556
																											35	6928009	10589376
																											35.1667	7003764	10691948
																											35.3333	7033329	10652861
																											35.5	7055627	10783658
																											35.6667	7045577	10733352

## Sheet: 4C
	Average (%/min)	SE
control	19.0985	1.4455
FCCP	65.415	7.7833

## Sheet: 4D
	average (%/min)	SE
before azide	21.3843	4.3721
during azide	8.2752	2.213
after azide	22.9963	1.0795

## Sheet: 4E
Time (min)	pyruvate (mM) (green trace)		Time (min)	Slope points (black circles)		Time (min)	Slope regression (red line)		Pulses	Time (min)			Box graph			Time (min)	mitoPyronicSF	mito-mCherry
0.1667	187.195		3.1667	193.267		2.0117	268.86		pyruvate start	0.1667			X axis position	slope (mM/s)		0.166667	3241288	3681943
0.3333	213.996		3.3333	164.77		2.0313	267.482		pyruvate end	4			1.428	1.005		0.333333	3255724	3554270
0.5	194.722		3.5	166.776		2.0508	266.105						1.679	0.7852		0.5	3263040	3663752
0.6667	195.534		3.6667	155.524		2.0703	264.727		UK-5099 start	2.8333			1.665	0.8232		0.666667	3210047	3599810
0.8333	198.643		3.8333	139.114		2.0898	263.35		UK-5099 end	4			1.905	0.9296		0.833333	3261131	3640031
1	206.08					2.1094	261.972						1.403	0.7657		1	3315617	3660614
1.1667	216.43					2.1289	260.595						1.446	1.1619		1.16667	3315639	3607452
1.3333	188.381					2.1484	259.217						1.919	1.1397		1.33333	3213250	3643306
1.5	216.394					2.168	257.839						1.43	1.0856		1.5	3335153	3628864
1.6667	219.455					2.1875	256.462						1.541	1.2773		1.66667	3362446	3643206
1.8333	205.181					2.207	255.084						1.807	1.1648		1.83333	3355058	3708987
2	195.702					2.2266	253.707						1.642	2.2547		2	3364085	3771592
2.1667	195.361					2.2461	252.329						1.795	0.5064		2.16667	3310514	3713454
2.3333	197.983					2.2656	250.952						1.864	1.1675		2.33333	3316373	3705352
2.5	210.526					2.2852	249.574						1.626	0.2989		2.5	3371427	3698608
2.6667	205.178					2.3047	248.197						1.824	0.3754		2.66667	3283228	3629595
2.8333	225.59					2.3242	246.819						1.502	0.4816		2.83333	3389109	3641856
3	211.091					2.3438	245.441						1.813	1.0641		3	3320756	3640105
3.1667	193.267					2.3633	244.064						1.449	1.1072		3.16667	3194456	3594715
3.3333	164.77					2.3828	242.686						1.426	1.2267		3.33333	3078130	3629082
3.5	166.776					2.4023	241.309						1.702	0.7356		3.5	2994007	3517606
3.6667	155.524					2.4219	239.931						1.693	0.6064		3.66667	2993072	3587639
3.8333	139.114					2.4414	238.554						1.877	1.0913		3.83333	2928228	3621521
4	139.005					2.4609	237.176						1.538	0.5508		4	2926339	3619971
						2.4805	235.799						1.608	0.2924
						2.5	234.421						1.88	1.6069
						2.5195	233.043						1.612	2.4929
						2.5391	231.666						1.566	1.0148
						2.5586	230.288						1.456	1.1236
						2.5781	228.911						1.676	2.3355
						2.5977	227.533						1.705	3.1485
						2.6172	226.156						1.442	2.2117
						2.6367	224.778						1.469	1.3116
						2.6563	223.401						1.742	1.3576
						2.6758	222.023						1.864	0.9396
						2.6953	220.645						1.452	2.0076
						2.7148	219.268						1.643	2.2138
						2.7344	217.89						1.441	1.8947
						2.7539	216.513						1.555	2.1573
						2.7734	215.135						1.657	1.0908
						2.793	213.758						1.461	0.4986
						2.8125	212.38						1.741	0.8006
						2.832	211.003						1.624	0.3765
						2.8516	209.625						1.854	0.6139
						2.8711	208.248						1.706	1.0158
						2.8906	206.87
						2.9102	205.492
						2.9297	204.115
						2.9492	202.737
						2.9688	201.36
						2.9883	199.982
						3.0078	198.605
						3.0273	197.227
						3.0469	195.85
						3.0664	194.472
						3.0859	193.094
						3.1055	191.717
						3.125	190.339
						3.1445	188.962
						3.1641	187.584
						3.1836	186.207
						3.2031	184.829
						3.2227	183.452
						3.2422	182.074
						3.2617	180.696
						3.2813	179.319
						3.3008	177.941
						3.3203	176.564
						3.3398	175.186
						3.3594	173.809
						3.3789	172.431
						3.3984	171.054
						3.418	169.676
						3.4375	168.298
						3.457	166.921
						3.4766	165.543
						3.4961	164.166
						3.5156	162.788
						3.5352	161.411
						3.5547	160.033
						3.5742	158.655
						3.5938	157.278
						3.6133	155.9
						3.6328	154.523
						3.6523	153.145
						3.6719	151.768
						3.6914	150.39
						3.7109	149.013
						3.7305	147.635
						3.75	146.257
						3.7695	144.88
						3.7891	143.502
						3.8086	142.125
						3.8281	140.747
						3.8477	139.37
						3.8672	137.992
						3.8867	136.615
						3.9063	135.237
						3.9258	133.859
						3.9453	132.482
						3.9648	131.104
						3.9844	129.727
						4.0039	128.349
						4.0234	126.972
						4.043	125.594
						4.0625	124.217
						4.082	122.839
						4.1016	121.462
						4.1211	120.084
						4.1406	118.706
						4.1602	117.329
						4.1797	115.951
						4.1992	114.574
						4.2188	113.196
						4.2383	111.819
						4.2578	110.441
						4.2773	109.064
						4.2969	107.686
						4.3164	106.308
						4.3359	104.931
						4.3555	103.553
						4.375	102.176
						4.3945	100.798
						4.4141	99.4206
						4.4336	98.043
						4.4531	96.6655
						4.4727	95.2879
						4.4922	93.9104
						4.5117	92.5328
						4.5313	91.1552
						4.5508	89.7777
						4.5703	88.4001
						4.5898	87.0226
