# Supplementary material for: A highly responsive pyruvate sensor reveals pathway-regulatory role of the mitochondrial pyruvate carrier MPC
Source: eLife. 2020 Mar 6;9:e53917. doi: 10.7554/eLife.53917 (PMC7077990; doi:10.7554/eLife.53917)
Supplement: Figure 5—source data 1. [file elife-53917-fig5-data1.xlsx]

## Sheet: 5
	Upper graph	Middle graph	Lower graph		Slope points	Upper graph	Middle graph	Lower graph		Upper graph			Middle graph			Lower graph			Time (min)	mitoPyronicSF ROI 1	mitoPyronicSF ROI 2	mitoPyronicSF ROI 3		mito-mCherry ROI 1	mito-mCherry ROI 2	mito-mCherry ROI 3
Time (min)	pyruvate (mM) (green trace)	pyruvate (mM) (green trace)	pyruvate (mM) (green trace)		Time (min)	slope points (black circles)	slope points (black circles)	slope points (black circles)		Time (min)	Slope regression (red line)		Time (min)	Slope regression (red line)		Time (min)	Slope regression (red line)		0.166667	1071522	593353	2038074		745472	400715	1269796
0.1667	205.071	147.422	153.46		2.3333	198.289	182.08	149.786		1.582	249.126		1.6797	227.526		1.0078	208.437		0.333333	1072210	610196	1981176		742200	406202	1229310
0.3333	211.98	164.567	163.968		2.5	180.763	173.526	146.913		1.6016	247.469		1.6992	226.048		1.0313	207.431		0.5	1033497	596568	1996685		749476	401328	1288981
0.5	155.274	151.493	144.07		2.6667	125.533	124.563	137.19		1.6211	245.811		1.7188	224.571		1.0547	206.426		0.666667	1136942	608389	2008207		753365	409314	1276863
0.6667	246.458	158.477	161.25		2.8333	146.743	148.041	130.649		1.6406	244.153		1.7383	223.093		1.0781	205.42		0.833333	1098977	606049	2027244		755185	398455	1237302
0.8333	210.602	169.441	169.722		3	124.108	138.909	120.742		1.6602	242.495		1.7578	221.616		1.1016	204.415		1	1080657	634578	2066420		752719	430803	1292086
1	181.176	149.484	153.943		3.1667	113.28	118.103	117.286		1.6797	240.838		1.7773	220.138		1.125	203.409		1.16667	1118032	646383	2144580		763182	420994	1311703
1.1667	227.549	161.966	165.257		3.3333	111.721	96.575	108.287		1.6992	239.18		1.7969	218.661		1.1484	202.404		1.33333	1069608	684801	2213882		745879	435899	1386153
1.3333	198.988	156.322	154.753							1.7188	237.522		1.8164	217.183		1.1719	201.398		1.5	1094612	628985	2289839		770015	408338	1434080
1.5	181.452	179.255	151.848							1.7383	235.864		1.8359	215.706		1.1953	200.393		1.66667	1081484	604488	2251207		752058	399139	1390470
1.6667	195.148	163.731	173.035							1.7578	234.207		1.8555	214.228		1.2188	199.387		1.83333	1099231	621235	2215158		748632	394307	1375531
1.8333	216.03	165.443	165.502							1.7773	232.549		1.875	212.751		1.2422	198.382		2	1120117	602865	2228742		764306	393584	1355505
2	222.578	181.703	175.659							1.7969	230.891		1.8945	211.274		1.2656	197.376		2.16667	1088105	631542	2273294		775818	420547	1458337
2.1667	183.223	171.035	148.553							1.8164	229.233		1.9141	209.796		1.2891	196.371		2.33333	1134859	655320	2334808		782985	415554	1473794
2.3333	198.289	182.08	149.786							1.8359	227.576		1.9336	208.319		1.3125	195.365		2.5	1065376	621706	2265162		763650	396053	1465193
2.5	180.763	173.526	146.913							1.8555	225.918		1.9531	206.841		1.3359	194.36		2.66667	1017569	589553	2094970		768022	398485	1376147
2.6667	125.533	124.563	137.19							1.875	224.26		1.9727	205.364		1.3594	193.355		2.83333	995831	576710	2088732		736170	382265	1355632
2.8333	146.743	148.041	130.649							1.8945	222.602		1.9922	203.886		1.3828	192.349		3	973246	564405	1966612		743169	388828	1322108
3	124.108	138.909	120.742							1.9141	220.945		2.0117	202.409		1.4063	191.344		3.16667	971751	559800	1998280		754422	401209	1337517
3.1667	113.28	118.103	117.286							1.9336	219.287		2.0313	200.931		1.4297	190.338		3.33333	966998	536750	1998220		759517	404507	1363289
3.3333	111.721	96.575	108.287							1.9531	217.629		2.0508	199.454		1.4531	189.333		3.5	976665	567418	1903627		759094	405619	1364883
3.5	117.396	99.3483	95.8048							1.9727	215.971		2.0703	197.976		1.4766	188.327		3.66667	984975	534592	1937807		765171	401794	1357787
3.6667	117.143	89.4332	96.4915							1.9922	214.314		2.0898	196.499		1.5	187.322		3.83333	940918	542891	1878319		766127	422125	1278273
3.8333	91.9277	64.2369	124.679							2.0117	212.656		2.1094	195.021		1.5234	186.316		4	926912	541915	1854282		773552	425974	1324682
4	83.6036	64.6952	93.7302							2.0313	210.998		2.1289	193.544		1.5469	185.311
										2.0508	209.34		2.1484	192.066		1.5703	184.305
										2.0703	207.682		2.168	190.589		1.5938	183.3
										2.0898	206.025		2.1875	189.112		1.6172	182.294
										2.1094	204.367		2.207	187.634		1.6406	181.289
										2.1289	202.709		2.2266	186.157		1.6641	180.284
										2.1484	201.051		2.2461	184.679		1.6875	179.278
										2.168	199.394		2.2656	183.202		1.7109	178.273
										2.1875	197.736		2.2852	181.724		1.7344	177.267
										2.207	196.078		2.3047	180.247		1.7578	176.262
										2.2266	194.42		2.3242	178.769		1.7813	175.256
										2.2461	192.763		2.3438	177.292		1.8047	174.251
										2.2656	191.105		2.3633	175.814		1.8281	173.245
										2.2852	189.447		2.3828	174.337		1.8516	172.24
										2.3047	187.789		2.4023	172.859		1.875	171.234
										2.3242	186.132		2.4219	171.382		1.8984	170.229
										2.3438	184.474		2.4414	169.905		1.9219	169.223
										2.3633	182.816		2.4609	168.427		1.9453	168.218
										2.3828	181.158		2.4805	166.95		1.9688	167.212
										2.4023	179.5		2.5	165.472		1.9922	166.207
										2.4219	177.843		2.5195	163.995		2.0156	165.202
										2.4414	176.185		2.5391	162.517		2.0391	164.196
										2.4609	174.527		2.5586	161.04		2.0625	163.19
										2.4805	172.869		2.5781	159.562		2.0859	162.185
										2.5	171.212		2.5977	158.085		2.1094	161.18
										2.5195	169.554		2.6172	156.607		2.1328	160.174
										2.5391	167.896		2.6367	155.13		2.1563	159.169
										2.5586	166.238		2.6563	153.652		2.1797	158.163
										2.5781	164.581		2.6758	152.175		2.2031	157.158
										2.5977	162.923		2.6953	150.697		2.2266	156.152
										2.6172	161.265		2.7148	149.22		2.25	155.147
										2.6367	159.607		2.7344	147.743		2.2734	154.141
										2.6563	157.95		2.7539	146.265		2.2969	153.136
										2.6758	156.292		2.7734	144.787		2.3203	152.13
										2.6953	154.634		2.793	143.31		2.3438	151.125
										2.7148	152.976		2.8125	141.833		2.3672	150.119
										2.7344	151.319		2.832	140.355		2.3906	149.114
										2.7539	149.661		2.8516	138.878		2.4141	148.108
										2.7734	148.003		2.8711	137.4		2.4375	147.103
										2.793	146.345		2.8906	135.923		2.4609	146.098
										2.8125	144.688		2.9102	134.445		2.4844	145.092
										2.832	143.03		2.9297	132.968		2.5078	144.087
										2.8516	141.372		2.9492	131.49		2.5313	143.081
										2.8711	139.714		2.9688	130.013		2.5547	142.076
										2.8906	138.057		2.9883	128.535		2.5781	141.07
										2.9102	136.399		3.0078	127.058		2.6016	140.065
										2.9297	134.741		3.0273	125.581		2.625	139.059
										2.9492	133.083		3.0469	124.103		2.6484	138.054
										2.9688	131.426		3.0664	122.626		2.6719	137.048
										2.9883	129.768		3.0859	121.148		2.6953	136.043
										3.0078	128.11		3.1055	119.671		2.7188	135.037
										3.0273	126.452		3.125	118.193		2.7422	134.032
										3.0469	124.794		3.1445	116.716		2.7656	133.026
										3.0664	123.137		3.1641	115.238		2.7891	132.021
										3.0859	121.479		3.1836	113.761		2.8125	131.016
										3.1055	119.821		3.2031	112.283		2.8359	130.01
										3.125	118.163		3.2227	110.806		2.8594	129.005
										3.1445	116.506		3.2422	109.328		2.8828	127.999
										3.1641	114.848		3.2617	107.851		2.9063	126.994
										3.1836	113.19		3.2813	106.373		2.9297	125.988
										3.2031	111.532		3.3008	104.896		2.9531	124.983
										3.2227	109.875		3.3203	103.418		2.9766	123.977
										3.2422	108.217		3.3398	101.941		3	122.972
										3.2617	106.559		3.3594	100.463		3.0234	121.966
										3.2813	104.901		3.3789	98.986		3.0469	120.961
										3.3008	103.244		3.3984	97.5086		3.0703	119.955
										3.3203	101.586		3.418	96.0311		3.0938	118.95
										3.3398	99.9282		3.4375	94.5536		3.1172	117.945
										3.3594	98.2704		3.457	93.0762		3.1406	116.939
										3.3789	96.6126		3.4766	91.5987		3.1641	115.933
										3.3984	94.9549		3.4961	90.1212		3.1875	114.928
										3.418	93.2971		3.5156	88.6438		3.2109	113.923
										3.4375	91.6394		3.5352	87.1663		3.2344	112.917
										3.457	89.9816		3.5547	85.6888		3.2578	111.912
										3.4766	88.3239		3.5742	84.2114		3.2813	110.906
										3.4961	86.6661		3.5938	82.7339		3.3047	109.901
										3.5156	85.0083		3.6133	81.2564		3.3281	108.895
										3.5352	83.3506		3.6328	79.779		3.3516	107.89
										3.5547	81.6928		3.6523	78.3015		3.375	106.884
										3.5742	80.0351		3.6719	76.824		3.3984	105.879
										3.5938	78.3773		3.6914	75.3466		3.4219	104.873
										3.6133	76.7195		3.7109	73.8691		3.4453	103.868
										3.6328	75.0618					3.4688	102.862
										3.6523	73.404					3.4922	101.857
										3.6719	71.7463					3.5156	100.852
										3.6914	70.0885					3.5391	99.8461
										3.7109	68.4308					3.5625	98.8406
																3.5859	97.8351
																3.6094	96.8297
																3.6328	95.8242
																3.6563	94.8187
																3.6797	93.8132
																3.7031	92.8078
																3.7266	91.8023
																3.75	90.7968
																3.7734	89.7914
																3.7969	88.7859
																3.8203	87.7804
																3.8438	86.775
																3.8672	85.7695
																3.8906	84.764
																3.9141	83.7586
																3.9375	82.7531
																3.9609	81.7476
																3.9844	80.7422
																4.0078	79.7367
																4.0313	78.7312
																4.0547	77.7258
																4.0781	76.7203
																4.1016	75.7148
																4.125	74.7094
																4.1484	73.7039
																4.1719	72.6984
																4.1953	71.693
																4.2188	70.6875
																4.2422	69.682
																4.2656	68.6765
