# Supplementary material for: A highly responsive pyruvate sensor reveals pathway-regulatory role of the mitochondrial pyruvate carrier MPC
Source: eLife. 2020 Mar 6;9:e53917. doi: 10.7554/eLife.53917 (PMC7077990; doi:10.7554/eLife.53917)
Supplement: Figure 6—source data 1. [file elife-53917-fig6-data1.xlsx]

## Sheet: 6C
Cytosolic PyronicSF							Time (min)	Cell 1	Cell 2	Cell 3	Cell 4	Cell 5	Cell 6	Cell 7	Cell 8	Cell 9	Cell 10	Cell 11	Cell 12	Cell 13	Cell 14	Cell 15	Cell 16	Cell 17	Cell 18	Cell 19
Time (min)	DF%	SE		Pulses	Time (min)		0.166667	84760	116319	56740	65310	139893	100660	109774	168929	159426	102036	102759	117544	72738	85610	72805	99156	89709	148220	64512
0.1667	127.91	9.5104		start glucose/lactate/pyruvate	0		0.333333	81517	118261	54000	67104	138257	104794	106863	165203	160397	99992	103694	120757	73125	81132	73599	95691	90904	144095	64187
0.3333	123.647	9.23		end glucose/lactate/pyruvate	1.3		0.5	83494	110704	55465	68791	138871	99610	106500	163714	153729	97409	104125	115338	78006	78022	74615	99616	89072	134890	64843
0.5	119.496	8.7638					0.666667	85399	105613	53007	63066	136951	102105	105177	160665	151079	102517	104950	107154	76712	70400	74016	97969	91224	140025	62258
0.6667	122.917	9.7072		start pyruvate 0.1mM	5		0.833333	82361	108088	52410	65019	137750	93273	104246	159654	152076	97034	101859	109875	74753	69253	75453	93747	92856	135305	61102
0.8333	124.426	9.6959		end pyruvate 0.1mM	8		1	85219	112414	54312	64370	136641	95773	106148	162223	144944	97598	99684	112610	77099	74169	75374	97106	87781	134705	62840
1	124.573	9.6928					1.16667	84607	106023	52740	62778	139929	96712	105305	161096	146376	98670	100897	107279	77006	67318	78014	93841	89627	135615	60212
1.1667	124.37	9.7209		start pyruvate 1mM	11		1.33333	83141	102197	52826	63712	139482	95410	104429	158038	138771	97183	100181	103971	75340	64743	73788	101244	92570	134485	62727
1.3333	124.089	9.6774		end pyruvate 1mM	14.5		1.5	82945	103164	53545	62965	139696	90727	102741	160830	139385	95615	98659	106529	75834	63003	74014	92950	89084	132770	62902
1.5	118.831	9.2623					1.66667	82401	106794	51958	64057	136397	92206	100250	161681	141338	98940	100500	109890	77506	66372	70429	93266	87680	133300	62658
1.6667	112.128	10.5581		start pyruvate 10mM	17.1		1.83333	82513	100723	53465	63601	138663	92265	103796	155864	137209	95943	96909	109904	76221	62368	72786	93088	92606	130965	60942
1.8333	97.0656	11.1114		end pyruvate 10mM	20.6		2	84447	100933	49694	64304	139520	89997	100458	158185	135247	97311	98278	103463	72116	61703	71953	96372	92325	130675	59545
2	80.7358	9.9915					2.16667	82202	102055	51931	60108	137217	92061	101783	153297	130585	98251	92541	98390	73922	60257	72115	90709	89490	131665	58153
2.1667	68.4719	10.0627					2.33333	83857	98895	51035	61585	136973	92401	97763	153835	128868	94911	101606	107154	77485	59047	76964	92119	91673	127955	58772
2.3333	58.7021	8.8683					2.5	80905	98708	48809	64453	139482	88828	98869	152225	131803	96857	96012	104368	73762	55270	76088	89887	90707	123990	56587
2.5	52.2922	7.9593					2.66667	80979	98532	49021	60006	136033	90846	97509	151319	125494	95800	96488	95353	75535	57112	75159	92025	90161	126720	57905
2.6667	46.4477	6.8048					2.83333	79191	103557	51337	59722	135627	90160	98692	151266	129826	97642	96387	103522	71977	58508	71703	87147	91231	122900	59012
2.8333	44.4857	6.8871					3	80479	99796	53212	61585	135616	90872	99765	147792	129053	93370	95916	101654	72061	56586	73250	90406	89195	122550	57512
3	42.4686	6.3527					3.16667	80454	94792	49844	58079	137516	84657	95874	147929	124600	91411	101934	99860	74587	54405	75937	89841	86608	115210	57527
3.1667	38.209	5.3676					3.33333	79865	89725	48997	57759	136812	86855	94265	145504	117006	95440	100331	92169	74221	51017	74467	86137	89815	121085	56743
3.3333	36.8757	5.3221					3.5	79784	86687	48260	57911	135379	80892	94272	140621	113374	92419	95606	91132	76052	44796	74692	91025	92380	121055	54095
3.5	36.0571	5.1556					3.66667	76912	84139	46622	58551	135259	79564	89480	139319	113179	91470	96472	88757	75494	45431	71791	86406	91514	112325	55885
3.6667	34.2125	4.5528					3.83333	77750	88853	47299	58269	137150	80980	93290	142446	115838	92145	92481	94382	71797	46633	69533	87769	91452	118265	56745
3.8333	34.2538	4.6299					4	79094	90431	46535	58101	136333	81640	95427	147790	116009	92436	95525	88316	75584	48492	73984	87409	87683	121530	54155
4	30.3529	3.7405					4.16667	78248	90445	47698	57434	133859	82552	92646	144431	114915	92204	95266	95743	74157	48622	74558	87447	87380	118910	56137
4.1667	29.7584	4.0147					4.33333	77763	91613	47479	58867	132926	83195	89863	141328	114526	95975	94684	97162	71355	49974	73231	87422	88399	120205	54210
4.3333	26.7772	3.5471					4.5	77903	92517	48299	57703	131788	83035	93124	142685	116450	95028	92147	93772	74977	50068	73860	83762	84608	119225	55692
4.5	27.0789	3.4925					4.66667	77300	94046	46670	58032	131779	82884	88655	140161	107944	92755	87041	93176	69866	51154	68747	84353	83969	114445	54095
4.6667	24.782	3.3888					4.83333	73893	90729	43948	54013	126109	79299	73553	138935	114650	88370	83069	92706	63959	48907	71662	80916	77577	120250	54808
4.8333	26.5449	3.5264					5	70128	87023	39194	49905	111658	74451	65330	136435	106174	84991	75366	93228	54503	51226	65555	78006	64700	102860	48643
5	26.4655	3.7728					5.16667	62233	78179	32177	43965	103319	70462	65465	130734	100950	79294	66697	77316	51846	45793	64341	72822	59805	93360	46898
5.1667	25.1478	3.3752					5.33333	60036	73151	29597	37484	99098	64645	63263	121859	90585	74038	62625	79287	45387	45856	54401	66488	56558	88975	40985
5.3333	23.8024	3.4686					5.5	55761	65324	30684	36788	95076	59686	63166	119942	85468	73296	59803	66662	42695	42212	53349	65884	53781	76400	37597
5.5	26.5695	4.1114					5.66667	52956	63321	29056	36174	96199	58346	62290	110607	82785	72211	58478	64588	43358	39695	49102	57722	53462	70360	37258
5.6667	27.9469	3.7785					5.83333	52204	62408	27191	35076	96205	53067	61582	103366	72726	71972	59213	60485	44782	37706	46387	56412	52817	68735	35622
5.8333	29.4865	4.3729					6	49510	56922	27528	34282	98538	55567	62009	100366	71759	68766	54478	64897	43593	36672	46423	55241	51928	69670	35212
6	30.5206	4.3073					6.16667	48510	57454	26958	33250	93342	53945	62442	98701	69624	69428	57672	57015	43593	35046	44643	57494	50305	73385	36767
6.1667	32.1576	3.9265					6.33333	47137	57141	28472	33851	94551	51753	60268	89882	66821	69319	53697	54044	43424	32574	44799	54709	52192	70260	33633
6.3333	31.983	4.5136					6.5	47382	55011	29083	34139	93855	53724	58796	86801	64100	69055	55003	56875	42427	31189	43225	52934	54320	70960	30380
6.5	34.2031	4.2937					6.66667	45248	56595	28306	32551	94415	50794	61513	83263	64038	68455	55081	57713	42727	29929	42588	52312	52209	69840	35273
6.6667	34.5444	4.4126					6.83333	45221	55733	27757	33573	95781	51741	59900	78897	59918	68849	53763	56471	42977	29699	42673	50662	55216	68315	33277
6.8333	33.1912	4.3392					7	46830	55723	29021	33854	94500	50701	59936	78846	59053	68464	55044	53463	39302	29880	44096	53641	54825	71710	31395
7	31.9311	3.4998					7.16667	45809	53763	27819	31968	97163	50904	58878	74996	54529	67204	52528	50529	44334	28533	41810	51106	53839	66495	32027
7.1667	34.4339	4.1832					7.33333	44782	52414	27885	33522	94737	52927	59418	75112	53576	66475	52291	56382	40297	28032	43187	52469	53173	58875	31440
7.3333	34.2003	3.7467					7.5	44660	50515	26854	31465	93422	46709	57073	70730	51224	65755	54112	52221	42506	25700	46538	51200	54325	62215	30452
7.5	31.5143	3.8159					7.66667	41261	51319	30295	33446	96663	49387	56044	69386	49826	66315	53916	51404	41314	25055	41036	54109	54490	62300	31560
7.6667	29.0199	3.4003					7.83333	43340	50445	25399	31225	92324	46215	58600	70701	49244	64272	54378	47971	41657	23831	43297	52197	54339	62285	33217
7.8333	29.4675	3.5918					8	41691	52582	26743	33354	93290	50756	54690	70585	53368	65398	52713	51963	42834	24064	43777	49947	52173	65025	31798
8	29.3515	3.8683					8.16667	43563	51718	27278	31573	93719	48898	57777	65373	51268	67319	53037	54419	41840	23474	44363	50188	55329	64090	31033
8.1667	27.1807	3.8401					8.33333	42105	52303	25601	35373	92060	46526	55710	64127	50374	65819	54350	52257	43055	22229	43473	52172	54466	62165	32015
8.3333	26.3952	3.3526					8.5	39840	48473	27330	33991	91958	49596	59325	65904	50947	66945	53213	49272	40398	22483	41255	48475	55700	59670	31537
8.5	32.6086	4.5053					8.66667	42153	50914	25712	31775	91685	48515	58723	65480	50694	68428	51694	55316	44480	23742	40426	51438	54543	68350	32817
8.6667	32.6707	4.1748					8.83333	42269	55622	27330	32278	96346	51698	58199	68464	53191	68342	52050	53250	42698	25301	40690	50969	53221	64690	31408
8.8333	30.3042	4.1169					9	40615	59261	26396	33867	93250	50570	60175	68522	52415	65830	54547	56949	42721	26252	41860	49541	52481	69045	32140
9	29.3398	4.0248					9.16667	43903	59313	28080	33718	94955	50116	63310	67103	49232	69843	54588	56537	40907	25981	42690	48394	54611	67815	33037
9.1667	27.8705	4.3857					9.33333	41740	60126	27681	35456	96321	53602	64150	67775	51106	70421	55653	52346	41849	28298	41706	53228	53978	68630	32818
9.3333	25.4428	3.8674					9.5	41647	61401	28747	33810	97339	53924	61606	67333	50944	68930	54987	57426	42442	25539	41360	51697	53457	71895	32452
9.5	25.7677	3.8943					9.66667	43836	62095	29056	34266	99047	53744	63093	68786	49603	71379	56625	55581	43445	26905	41052	54756	56865	71600	32507
9.6667	24.3643	3.6773					9.83333	44340	58553	28038	34345	98172	52509	60462	69719	53371	70428	59247	60618	45985	25223	43382	48497	59668	69095	34480
9.8333	22.9559	3.7887					10	44053	61223	29469	36149	99862	51424	61327	66728	48841	70953	55384	54757	43904	25315	39701	52431	57560	74130	33387
10	25.0698	3.8396					10.1667	42746	55937	30375	34282	99138	51651	59602	64027	48768	70434	56159	54721	46767	24586	43813	52159	59089	66505	34958
10.1667	24.8989	4.4034					10.3333	46365	61393	29163	32079	103208	54657	58861	67205	51297	69274	57097	56360	43587	25362	44426	50638	57649	74250	35113
10.3333	22.0837	3.7557					10.5	45515	64015	28087	36009	99237	54020	58482	66201	50718	69798	56019	53316	45648	25267	44538	54494	56298	73095	34053
10.5	19.7769	2.6327					10.6667	45038	56160	28229	33611	98270	53965	58440	62674	49221	69889	56066	56809	43581	23216	44684	54278	59041	67955	33993
10.6667	16.3654	2.1936					10.8333	42603	57458	27097	36544	96087	53605	58965	62449	49526	66164	55184	50412	44099	22120	45349	50594	57505	68070	33022
10.8333	16.1518	2.3705					11	43416	56466	29292	35715	97953	50922	58082	64739	50759	66330	52297	52287	44767	22142	42379	52519	58005	67110	33583
11	18.489	2.7385					11.1667	43884	55922	26941	33832	96565	51169	59011	61065	49179	66075	56047	52184	45814	21950	43223	51772	60964	71215	33403
11.1667	17.7543	2.7707					11.3333	44748	53504	25806	31161	96049	50608	57936	60152	48503	67140	54334	53088	44840	21944	42409	51662	60673	67485	33005
11.3333	20.169	3.1981					11.5	42927	59176	25566	34361	95286	48997	57690	63431	50024	67100	53138	49544	44773	22046	43099	52653	50748	64870	32982
11.5	22.3062	3.6718					11.6667	43578	62294	28361	34054	97926	54701	59378	64054	50697	70036	55275	56456	43285	26455	42225	52219	49481	77150	33545
11.6667	24.3743	4.0592					11.8333	42985	59664	30281	36104	99342	53384	56951	66299	50744	70794	56150	58051	44395	26311	42173	53300	47288	71925	33652
11.8333	31.1913	3.7104					12	45260	61809	26222	33440	96810	54904	54434	65176	49268	73745	52931	57184	41573	26743	45492	52981	45099	68595	33240
12	44.7254	4.1545					12.1667	44502	58458	27021	31434	96145	54023	55883	64109	50106	69587	51906	53728	43663	25817	44838	51731	46050	74565	34158
12.1667	58.2733	4.3584					12.3333	42544	59821	28267	29886	95056	55727	52991	61862	48950	69400	51731	58338	40837	26494	41607	52416	46656	68885	32845
12.3333	73.3092	5.0706					12.5	42641	60384	24580	31491	94478	51651	54987	62397	50282	66883	53006	52191	40506	26229	42396	51900	42469	67105	33032
12.5	81.1756	5.2781					12.6667	45162	59658	26861	31215	92446	52081	53814	60661	48550	67992	51481	52522	40346	26459	42769	50466	45423	69560	31127
12.6667	84.2498	4.6741					12.8333	42372	55431	25431	32487	93310	50177	56931	59045	46821	67642	51953	52669	40206	25764	42176	52044	44534	67270	32672
12.8333	91.8624	5.651					13	40998	56620	23444	31715	93621	49576	51985	61835	50044	67251	54147	55699	40971	25356	40027	47519	46543	60045	32557
13	94.9445	5.1954					13.1667	43084	58084	26066	32032	94998	52177	49967	58978	47068	67813	53769	54059	40398	25481	40577	52450	44760	69060	33895
13.1667	95.5249	4.6943					13.3333	42376	58872	28069	32487	92147	51660	49611	59397	48432	66775	53419	56838	40154	24786	41220	48203	44120	70940	31293
13.3333	95.871	4.2118					13.5	39439	58143	24830	31478	92565	49930	51719	57085	46003	66432	52400	53412	39331	25195	43041	49484	46572	65205	30617
13.5	99.7084	5.0576					13.6667	41099	54582	24677	30392	91801	51672	52044	55614	46082	63889	52284	45713	40985	23750	43646	48216	47423	62140	31228
13.6667	102.372	5.3255					13.8333	38557	47727	23330	31794	90987	46738	51219	52547	43815	61666	52394	45191	43227	22509	42563	51422	46909	56960	31775
13.8333	98.6911	4.8418					14	38517	50042	25087	31519	89431	46122	49126	54408	44285	60091	51188	45779	41145	21396	41920	48697	48661	58215	32372
14	99.9975	4.415					14.1667	41389	53502	24785	31373	91040	49390	49487	56058	43559	63540	50888	49213	40680	22772	42376	49744	48262	58465	30215
14.1667	110.374	6.8667					14.3333	40126	51807	24118	32528	93482	48669	47551	54897	41609	62349	52944	49456	42026	22113	41879	49075	48310	59635	30365
14.3333	115.649	8.9077					14.5	40071	52718	25812	31161	91998	47375	49493	53513	45097	65345	51116	52809	43465	23392	41959	49297	48272	62035	32213
14.5	110.883	9.4189					14.6667	41555	57521	25517	29576	92397	48738	48626	60442	46703	68100	52603	52096	42407	26365	41505	48194	42779	65965	32528
14.6667	93.1462	9.1029					14.8333	40116	60460	26920	31465	90817	53520	49082	59321	47491	69358	52484	52044	39971	27290	42143	49388	42243	70300	32452
14.8333	75.185	8.5082					15	44128	60109	28399	35465	99915	59535	54212	60328	47144	71115	56566	53272	47142	28730	41522	48981	45577	72975	34182
15	59.1689	7.876					15.1667	45594	70643	32344	42709	108864	70105	59502	65835	49747	74887	61853	54301	53430	31477	42802	53362	55772	79770	37018
15.1667	43.148	6.1991					15.3333	52628	72987	33951	46348	117998	75256	61405	71902	55541	78926	70387	62897	59733	34690	47959	56931	61024	88010	41830
15.3333	36.1792	5.2571					15.5	56519	79939	37163	49234	122835	84363	64480	77444	60903	84694	76762	69522	66712	37071	54346	62356	66849	99660	49302
15.5	27.3626	4.0153					15.6667	62057	86145	41076	51241	129013	85131	64462	82275	63612	86491	82556	71324	66427	38887	58044	65037	68851	103770	50983
15.6667	26.5476	4.0783					15.8333	63664	85718	37344	52595	129560	83244	63836	88129	68041	89485	81006	71824	69390	38793	64088	68566	72341	103110	52807
15.8333	21.4013	2.6906					16	64592	90137	40719	54437	131513	87448	65122	93417	70132	93385	84797	75507	70262	41159	63841	70991	71990	112070	55905
16	19.4057	2.3668					16.1667	68460	88947	41858	56297	132944	88622	64044	92594	73150	92840	84456	74419	69901	41512	67769	77675	75365	112140	56137
16.1667	20.5952	2.6381					16.3333	71800	83809	42778	58943	132580	85401	66628	93397	72982	90783	91363	76993	69273	38033	70783	76341	77469	105715	57523
16.3333	16.9246	2.1689					16.5	71576	86496	41924	54699	131991	83852	64040	95482	73985	90047	88609	72176	77299	39953	73747	79603	81524	104240	55682
16.5	18.7832	2.9067					16.6667	73906	89813	42069	57364	132797	88616	65088	98435	72518	94464	89716	78199	71549	41023	75159	80344	79846	109960	54730
16.6667	12.6916	1.6306					16.8333	73021	90176	42420	54994	136873	87895	64146	98179	75562	94947	87647	79934	76253	41389	72352	86588	81781	113335	58857
16.8333	12.3254	1.381					17	74553	84901	42622	58177	131842	83555	63735	97609	74041	90834	88316	77029	74015	39743	74247	81438	84233	108195	56563
17	10.7335	1.3768					17.1667	77515	86368	42993	57921	131895	83831	62153	98484	77144	90191	90431	70257	76555	40413	76371	85525	83507	104730	58708
17.1667	8.902	1.1484					17.3333	75737	100561	43778	57769	133679	89390	62779	104647	83385	97530	94269	84221	75523	46322	75467	85003	77046	122460	59920
17.3333	11.0757	1.3996					17.5	77366	111912	42688	59282	134904	90291	60699	114487	82632	98740	89838	91691	73762	52334	77549	85266	73618	129405	59097
17.5	10.6683	1.4857					17.6667	76294	109664	42351	55918	127725	90910	54394	108897	84035	98081	87613	93728	70453	50324	77723	85353	67224	126570	59882
17.6667	11.2517	1.6628					17.8333	71088	100309	38590	44427	120167	78381	46164	104545	78738	95443	75891	83162	61773	46751	76030	83597	63466	117165	54912
17.8333	17.1403	2.3392					18	66260	88116	35080	39728	110574	67314	43301	93368	74424	88598	71275	86228	51747	40698	69879	75950	58103	95935	49288
18	25.805	2.6919					18.1667	60323	82069	31660	35816	98438	57686	41480	84940	66941	79530	63713	78338	47724	37786	65354	73613	50228	84765	44187
18.1667	79.5089	5.8631					18.3333	54179	68097	27708	35335	92527	51637	43354	75295	61662	74736	57338	66676	40180	32609	61588	70928	47091	72335	36893
18.3333	133.16	8.4141					18.5	49731	66569	28295	30842	92471	52640	44345	66105	56418	74323	55672	63228	44483	31026	57555	62425	42240	66500	35045
18.5	156.859	8.6897					18.6667	43840	59424	26229	31190	90828	49331	42657	64712	53509	69604	53172	55081	43387	29515	50151	57628	43498	61660	31653
18.6667	171.965	9.962					18.8333	46550	56891	26503	30269	92625	50599	43701	59092	50444	66781	51647	58118	42148	29602	48637	55103	44570	63970	32295
18.8333	177.31	10.9802					19	40790	53202	26632	31206	92580	50459	45159	56938	47391	65453	51909	48757	42509	26941	45736	52322	43226	61205	32057
19	176.229	10.204					19.1667	41578	52015	23688	31000	89779	51892	45201	53317	45738	66000	48647	45272	42672	27302	46552	50981	46404	60945	31630
19.1667	176.778	10.1667					19.3333	40555	54950	26108	31478	88908	52645	43595	53475	45809	66992	50622	47419	44041	28041	45385	48591	44791	60825	31978
19.3333	176.591	10.0232					19.5	39653	51002	25319	30522	94460	48468	43113	54176	44315	64664	48347	46713	42985	25755	42893	47147	45368	55295	32677
19.5	173.6	9.8714					19.6667	40996	55670	24361	29082	93826	51096	44779	53658	43885	66398	50616	48456	43544	27083	42008	49263	42865	59340	31088
19.6667	178.219	10.5241					19.8333	39074	47324	23024	30196	91518	48047	42956	50002	42529	61717	48347	42699	44201	24956	39813	48119	46553	51010	30465
19.8333	172.591	9.8499					20	38000	47059	24757	31434	90049	49180	43865	51219	40494	62366	49091	39051	44500	25013	39467	46672	45582	51810	29388
20	176.512	10.6021					20.1667	37719	44426	24573	29532	89897	47477	44186	49065	41176	58698	48272	39625	44462	23998	40805	42931	49368	50445	30030
20.1667	186.061	12.5049					20.3333	37334	44466	22420	30212	89455	45331	44334	49558	40871	58079	49434	37066	44279	22656	40261	45341	47087	48755	29120
20.3333	189.257	14.0333					20.5	38378	47048	22365	30668	91674	46837	42896	48864	41785	61238	46600	38831	43192	23903	43140	44503	46457	52960	30627
20.5	188.949	13.6242					20.6667	38027	46838	22538	32475	88868	45860	44462	46629	41550	57775	48256	40500	44227	23022	39261	45284	48327	51335	30850
20.6667	182.761	12.3156					20.8333	37639	45588	22163	31054	86252	47526	44520	50203	40688	59919	46119	42603	44884	24818	40569	46362	46447	52520	29683
20.8333	179.952	12.7555					21	40374	53727	24931	31272	88350	49477	42243	53205	42903	66008	48209	43912	47991	26903	42835	44166	46757	58245	30717
21	179.925	14.4206					21.1667	39340	55496	26597	34206	97183	56541	51812	57797	48809	66615	60812	45118	48953	29980	40154	47453	45709	62430	33477
21.1667	165.897	14.2537					21.3333	58185	70574	41917	57823	128545	88590	65701	76411	67785	83694	96591	52287	80680	44978	49698	56287	78986	90045	50787
21.3333	150.855	14.6909					21.5	84202	106502	46191	69826	145067	106735	67562	116002	90006	101279	115963	78610	97407	60177	70115	77906	94091	134085	70330
21.5	134.819	15.7035					21.6667	96689	116832	53024	73063	150650	109831	67491	132092	103100	111996	116144	92390	101686	65658	89030	100088	103036	142775	75770
21.6667	116.434	16.0025					21.8333	105496	125962	54448	73718	153089	113619	71159	140109	106962	116606	119728	104691	104192	69814	101511	110537	102786	153530	81527
21.8333	97.299	15.7048					22	107221	128265	54486	73576	155692	115201	66841	142703	109832	115158	125984	116051	110395	71810	102912	113884	104111	150415	82388
22	81.715	14.6173					22.1667	108590	124292	55583	76611	150946	115965	66962	141737	114568	118038	121447	104191	107750	73084	108835	116969	104221	146640	79828
22.1667	70.4103	13.6217					22.3333	107840	123300	58583	74560	152529	115480	67319	139549	115706	114457	122922	107059	108360	72183	105206	120397	106096	145480	81198
22.3333	56.2464	10.9346					22.5	107769	120321	56052	77756	149513	112724	68712	136618	111326	114630	121478	110779	107759	70952	110080	119178	109861	144325	84698
22.5	45.886	9.1021					22.6667	107655	122019	55365	77956	148040	112067	68575	140290	108074	113600	122650	102441	109233	71146	107931	119497	104644	145810	79053
22.6667	39.2055	8.1442					22.8333	109628	122134	55701	76228	148239	111017	69783	143576	116226	119074	126750	110537	104177	74777	108821	118259	104329	143385	83353
22.8333	33.433	6.1731					23	109298	120670	53510	78801	146103	110427	67425	142717	108994	114715	119253	98081	107186	72193	108896	118819	107118	141130	81983
23	27.5975	5.0002					23.1667	111000	118775	54101	76810	145402	110110	70367	143741	118041	115979	122488	109912	106358	72296	107266	117500	103697	147280	82995
23.1667	21.8024	3.4795					23.3333	112954	135786	58062	79383	143641	110895	68162	150525	123056	121225	124863	118610	107788	78536	110014	114475	101531	153170	83275
23.3333	16.1864	2.9915					23.5	117315	142674	57965	74000	138614	111933	66015	152482	121482	125906	127450	123684	104558	83794	108857	116925	102337	156875	83063
23.5	11.9971	2.185					23.6667	117130	135853	57309	73373	138129	113916	69544	151971	126138	126183	126469	119478	103762	82803	111025	117578	99858	161605	83630
23.6667	9.6399	2.21					23.8333	113347	128294	56948	74867	144000	114535	67290	148449	119529	122702	120381	114360	102715	80392	109613	117628	101861	154950	82122
23.8333	7.5155	2.074					24	113135	128410	56021	75139	141685	108154	62865	153875	125112	121843	121447	112096	99337	79895	109508	119209	95976	145675	82708
24	8.4126	1.9123					24.1667	113021	132025	53062	72022	135804	106515	62142	155190	125991	121013	119984	125838	92128	79930	110761	118900	93613	150060	81892
24.1667	6.6351	1.6964					24.3333	106689	128242	49142	64715	127723	102102	52542	149491	121144	121074	115175	116368	91648	78643	110560	116012	87548	136365	74567
24.3333	7.9533	1.5606					24.5	102750	122926	48590	58019	118592	86378	48823	149315	119335	114415	109806	114647	77672	71934	105865	111234	77392	127530	72457
24.5	5.4066	1.7349

## Sheet: 6D
mito-PyronicSF							Time (min)	Cell 1	Cell 2	Cell 3	Cell 4	Cell 5	Cell 6	Cell 7	Cell 8	Cell 9	Cell 10	Cell 11	Cell 12	Cell 13	Cell 14	Cell 15	Cell 16	Cell 17	Cell 18	Cell 19	Cell 20
Time (min)	DF%	SE		Pulses	Time (min)		0.1667	29.1797	29.0926	32.0043	25.8551	23.4099	27.3835	22.0727	28.7388	22.6057	43.3705	20.8021	28.0575	16.4861	28.0435	35.0781	18.004	28.6172	17.1162	30.1011	23.6828
0.1667	26.4851	1.4291		start glucose/lactate/pyruvate	0		0.3333	30.2978	32.5177	32.3099	34.2142	18.0009	20.8545	20.0708	26.3165	28.7736	55.9601	21.3962	34.7457	17.604	26.1565	46.0332	22.039	36.8633	24.3218	31.5042	31.8832
0.3333	29.5932	2.1226		end glucose/lactate/pyruvate	4		0.5	31.6542	32.0454	34.0145	30.814	19.4633	22.5426	16.5587	25.4091	28.8332	59.3591	19.5904	31.1914	17.0814	26.222	39.8065	24.2242	35.7852	23.011	30.6534	29.8413
0.5	28.905	2.1366					0.6667	33.0195	29.6095	31.0473	28.9894	18.8775	18.6607	15.9573	25.702	22.61	50.0346	20.9714	27.5723	18.9832	28.4366	33.2523	20.1398	31.2148	23.8553	31.6378	28.7999
0.6667	26.9686	1.7121		start pyruvate 1mM	9.4		0.8333	26.8316	27.4526	31.4095	30.7534	23.2728	21.4358	19.7633	25.5341	24.2593	51.2654	17.1618	30.8715	17.1457	30.5552	35.49	17.9405	34.3633	26.1408	27.491	30.3743
0.8333	27.4756	1.7526		end pyruvate 1mM	13.1		1	29.7181	21.8297	28.5387	24.32	22.1179	21.5377	20.7876	25.4019	18.8693	38.11	19.6685	20.6038	13.9633	31.8875	26.45	11.3178	25.6094	16.7018	25.2639	19.763
1	23.123	1.3818					1.1667	27.9586	19.2897	29.0205	24.3334	20.9214	18.5458	17.6763	23.3762	17.4113	34.0762	18.7174	24.9093	15.1497	30.7518	26.9114	12.6911	24.9414	18.5938	26.2527	18.82
1.1667	22.5174	1.2511		start pyruvate 10mM	19.1		1.3333	29.3386	18.5571	28.7148	22.8656	23.6135	17.9809	15.2186	25.3519	15.2646	38.2137	16.724	20.6972	16.6274	31.6516	24.8028	14.6539	23.125	16.6549	25.9276	18.1803
1.3333	22.2082	1.4218		end pyruvate 10mM	22.3		1.5	28.2587	27.4042	28.7646	30.9756	16.7421	22.7167	14.1147	24.1551	23.6812	48.8814	19.8197	31.2273	14.5629	27.6198	39.4443	19.9033	28.2148	17.9501	30.4931	27.0778
1.5	26.1004	1.8619					1.6667	29.0473	22.8598	26.6314	25.0202	24.9927	23.1436	17.7202	26.1022	21.3645	47.3396	17.7611	22.257	16.7088	32.9096	33.6095	15.6	28.4258	18.9534	20.9078	27.0983
1.6667	24.9226	1.6356					1.8333	30.3507	22.2573	25.7642	24.9529	23.8461	18.0925	21.0018	24.5695	21.5218	39.22	18.8269	26.8535	15.2396	33.5736	28.5835	17.5875	29.3164	19.2062	24.0346	21.9115
1.8333	24.3355	1.3061					2	29.1532	20.9186	29.6784	22.4751	27.2278	20.2141	21.3807	27.6206	18.9373	41.306	16.0986	22.7709	13.7791	31.0837	26.3508	13.2383	24.3203	16.8686	23.5045	21.5466
2	23.4237	1.4788					2.1667	28.9825	17.7055	29.1534	21.8556	22.7868	17.1631	18.3079	25.4198	18.9586	34.5642	18.9519	20.3235	15.9978	30.7998	23.6914	12.3839	19.5391	18.0778	26.5289	19.4186
2.1667	22.0305	1.2611					2.3333	27.326	28.8732	29.891	30.7063	20.3731	21.8956	16.3225	23.93	21.254	48.104	20.5258	28.1042	19.313	29.3059	35.5941	19.1725	29.7539	22.0207	27.9943	27.4017
2.3333	26.3931	1.5947					2.5	30.3596	29.4868	28.233	30.5481	19.6502	22.4375	16.2401	25.1876	26.0149	51.4727	21.4248	30.7206	15.5009	27.2529	35.2716	19.5467	32.6641	22.6592	30.9118	32.2973
2.5	27.394	1.7901					2.6667	29.9918	29.1335	31.4892	29.5751	21.8437	19.8791	18.7637	24.8946	25.7471	47.5296	17.5813	29.1177	17.634	28.1265	33.1679	18.8407	31.9492	23.2638	27.1168	28.8204
2.6667	26.7233	1.5727					2.8333	30.3507	21.4318	27.2362	27.8616	23.734	20.7133	17.8411	23.737	19.7067	42.5672	17.6204	24.1222	11.4147	32.3592	29.9578	15.1516	23.3711	18.6251	29.5488	23.1662
2.8333	24.0258	1.5626					3	28.3293	18.2596	25.5748	23.145	21.9185	16.5096	18.4946	22.0079	16.4506	37.6652	20.7812	22.3109	12.7554	27.0781	25.2195	11.166	25.418	15.5735	25.8251	19.9393
3	21.7211	1.355					3.1667	25.8047	16.3295	27.5817	23.0036	22.5583	21.2322	17.9097	21.7363	16.6121	35.1775	15.309	20.7763	11.9887	30.1096	24.133	9.1926	21.5313	17.2908	28.4843	21.2678
3.1667	21.4015	1.3934					3.3333	25.4016	18.9253	24.5481	22.8151	19.6959	20.5163	17.1079	22.6367	14.0956	33.1692	13.6492	17.434	11.5904	28.773	20.8087	11.8932	21.3398	18.0596	19.5448	17.8687
3.3333	19.9937	1.2076					3.5	26.8611	18.7542	26.5617	23.7645	23.3102	18.0531	16.8497	21.8328	16.5994	33.4845	15.7651	19.31	12.7168	28.9958	28.5339	11.7061	17.8672	16.139	20.9478	14.404
3.5	20.6228	1.3231					3.6667	22.4504	27.0361	27.0036	29.629	12.5338	18.6443	16.3747	24.4587	23.6854	38.7795	16.8856	27.1698	15.5866	20.9802	36.6758	18.6501	28.1992	16.8999	31.718	24.5644
3.6667	23.8962	1.5786					3.8333	27.2642	29.881	26.6414	31.4503	14.3409	21.2027	14.4305	20.9646	26.763	56.7245	16.8543	28.7367	14.156	24.3087	38.3627	19.3067	34.0039	23.209	32.3816	29.0787
3.8333	26.5031	2.2115					4	22.4857	27.8319	24.3953	34.2715	11.2625	20.1156	14.6172	18.3458	27.4006	59.9464	19.9317	31.2489	13.1366	21.037	42.8926	19.7656	34.8398	20.3841	32.8582	31.6577
4	26.4212	2.5365					4.1667	24.2953	30.0855	27.5884	35.5575	10.2655	22.8086	15.2186	20.5859	25.9469	64.1747	19.1656	31.0081	13.2565	21.452	43.6964	19.9598	38.3242	19.8655	30.8539	32.4737
4.1667	27.3291	2.7136					4.3333	21.4441	30.3905	22.3751	36.9647	7.3865	16.8084	7.494	19.7642	26.1637	62.8747	17.8549	30.336	12.3056	14.0523	39.5832	23.3064	35.9688	19.73	31.3349	32.0677
4.3333	25.4103	2.879					4.5	24.9367	26.7943	21.1922	33.679	11.7693	20.0631	12.5275	19.875	24.9692	58.5385	15.2048	33.6388	11.933	19.5213	38.4073	17.9016	30.9531	18.2993	26.2616	33.4003
4.5	24.9933	2.4885					4.6667	22.6299	26.5526	21.5776	35.8942	11.5325	18.398	9.537	17.3991	24.7056	58.694	18.5038	31.3711	15.1069	17.7085	38.3875	18.7383	37.0117	22.6696	28.8228	32.3589
4.6667	25.38	2.5461					4.8333	22.983	23.1722	23.6277	29.8344	16.6632	19.6394	13.7961	21.3005	18.4612	47.5987	13.115	23.9317	11.3462	20.4211	30.6276	17.5416	28.5781	14.5415	21.5714	22.9407
4.8333	22.0846	1.7983					5	20.0847	14.2916	21.7903	24.7071	17.2905	15.1762	13.9225	19.2533	13.407	35.5705	10.6186	17.7287	8.0439	21.0108	20.5755	11.226	22.4648	13.0065	19.5136	17.3685
5	17.8525	1.3537					5.1667	18.6842	11.6809	21.8999	19.0176	16.9872	13.9545	12.6126	21.4005	11.6429	28.6646	10.8088	15.0979	10.8065	20.1503	17.0925	7.6323	16.125	7.5105	17.5182	13.0387
5.1667	15.6163	1.1679					5.3333	18.643	10.2492	19.3813	16.5601	17.843	11.672	11.981	19.5748	7.813	22.0308	7.4786	11.0764	6.1121	19.1631	18.1345	4.8328	15.582	9.3529	16.7431	8.8195
5.3333	13.6522	1.1769					5.5	17.5249	8.1183	19.1388	16.964	16.4264	10.782	8.8285	18.3637	8.4846	26.246	9.2558	10.2354	5.4397	21.1724	17.1074	6.1567	16.4336	10.6664	13.0462	9.0779
5.5	13.4734	1.2501					5.6667	20.0641	7.8505	18.4709	14.9912	15.7908	7.9871	11.6679	18.1529	6.61	19.6165	9.2844	8.4528	4.4031	20.7574	10.9055	3.329	11.5234	8.3366	8.111	4.748
5.6667	11.5527	1.2531					5.8333	14.759	4.92	17.7864	16.2672	19.8288	9.5602	14.1641	18.1886	9.2285	27.1573	8.0363	10.8607	5.1356	22.5178	14.8201	7.1804	10.3711	9.0897	14.4492	6.9089
5.8333	13.0615	1.3412					6	16.6068	3.7449	16.9059	15.1057	15.9611	8.795	9.8693	18.771	3.8597	18.2215	6.1445	8.6792	2.7284	21.7184	12.5229	0	12.4961	5.2537	11.416	4.5922
6	10.6696	1.3955					6.1667	20.0847	3.6036	17.7864	12.5337	16.9125	10.9199	12.5165	17.2061	5.4835	16.5457	5.4331	8.8266	5.5596	18.9359	8.9606	1.5462	9.1406	7.9092	13.9103	4.1617
6.1667	10.8988	1.2696					6.3333	14.3647	8.267	17.7897	23.9025	14.262	12.3781	11.5224	16.2379	12.8332	28.2586	11.0746	14.3181	8.3094	15.0832	20.1985	8.2148	12.7148	12.3733	18.1373	10.6728
6.3333	14.5456	1.1523					6.5	15.1003	13.7226	19.5541	28.0232	9.0898	15.3141	3.8115	14.3909	18.2062	43.3446	11.4707	20.7655	6.3606	15.6511	28.4991	16.9026	24.3008	13.804	21.0592	19.3899
6.5	17.938	1.9495					6.6667	16.2067	13.3395	17.1318	26.1042	8.9194	11.6818	6.4889	16.0486	18.6865	39.721	9.7248	17.2147	8.3865	12.6938	25.036	12.5181	23.5938	13.4678	21.8966	16.2901
6.6667	16.7575	1.7249					6.8333	14.3441	15.3403	20.5609	27.03	13.1112	12.5423	10.6025	13.9443	16.6844	40.3947	11.6349	17.398	7.2814	14.8692	20.9129	13.6407	22.6914	16.1416	18.1863	17.2988
6.8333	17.2305	1.576					7	15.0032	9.1484	17.1086	20.2296	15.2009	10.9856	9.4629	15.8199	9.9596	32.0593	7.5881	13.8796	6.1507	16.9834	20.6698	7.9571	15.3086	12.157	16.4982	10.2136
7	14.1192	1.3258					7.1667	14.1293	7.5009	18.019	18.6574	13.7385	10.2138	9.2377	14.916	10.7715	27.939	6.1601	11.7305	6.896	19.661	16.6708	8.1336	15.3398	13.7232	15.5672	10.4719
7.1667	13.4739	1.175					7.3333	13.8439	6.8873	19.4644	17.5667	10.9177	12.296	6.4614	14.4194	7.3794	27.451	9.7639	9.1644	2.5699	16.9091	16.8544	7.9182	16.8516	8.4148	14.4448	7.118
7.3333	12.3348	1.3022					7.5	11.0604	3.2837	18.2881	15.4222	11.2085	13.0316	7.7329	15.6234	3.8342	20.0484	9.1125	7.7664	5.6667	18.1628	7.5416	4.0527	10.8125	8.2089	11.8347	2.7266
7.5	10.2709	1.172					7.6667	12.4198	5.5337	16.4474	20.775	12.4881	10.8969	11.2011	15.1018	10.5632	29.8048	9.5607	8.327	6.1807	16.7999	16.77	5.7189	14.6836	6.7052	18.2976	11.0993
7.6667	12.9687	1.3229					7.8333	12.2786	8.8806	17.9758	20.3205	10.0993	11.5176	5.2971	15.6449	8.3061	28.63	8.9118	11.0943	4.8657	15.3453	21.6274	10.4423	14.5156	11.2788	20.2174	7.8027
7.8333	13.2526	1.3526					8	14.7119	13.9903	15.9722	28.7335	8.126	11.1399	6.9722	13.169	14.4315	37.9071	8.4636	15.5831	6.2792	11.3441	26.7427	13.4501	23.6172	11.4664	24.1726	20.173
8	16.3223	1.8361					8.1667	11.8637	15.4072	17.5339	28.3295	5.4048	12.4405	3.3117	12.6545	16.5484	42.9386	10.6707	20.5786	4.2875	9.5313	28.0675	11.3567	22.6641	11.0833	23.9544	19.9065
8.1667	16.4267	2.1361					8.3333	13.4526	16.4894	16.4773	31.5614	10.9551	12.8838	6.8541	10.6645	17.2285	54.0511	9.5971	20.1473	5.5596	15.1138	29.7048	14.4774	28.5352	15.9774	20.5603	18.0081
8.3333	18.4149	2.4437					8.5	11.2252	12.4916	13.0449	28.0939	10.9135	13.9085	7.5544	10.3894	18.3677	44.2386	10.6082	19.4106	6.609	13.7684	23.6368	13.0053	25.6641	12.0866	20.832	19.4145
8.5	16.7632	1.9597					8.6667	12.7523	9.2116	14.6299	23.5524	10.2115	7.4157	8.5622	12.2222	11.9617	36.4127	7.1477	10.3432	4.159	16.5247	16.5914	7.3746	17.7188	15.047	17.968	11.3453
8.6667	13.5576	1.5903					8.8333	9.4539	11.6326	16.2048	29.3731	4.7235	12.759	2.0897	11.2826	16.1445	43.608	9.7848	19.1626	4.8272	6.5216	28.1965	11.3108	22.418	14.3617	22.9166	16.5976
8.8333	15.6685	2.2245					9	11.387	10.8665	15.2246	28.0535	4.8523	11.1137	2.3286	9.632	15.2519	53.6365	11.5072	19.1375	5.5767	8.8106	23.1208	13.4571	27.4609	12.3785	19.2152	20.3657
9	16.1688	2.5168					9.1667	9.8187	12.5363	12.8323	26.9358	8.9693	10.69	6.7882	9.9428	14.9075	45.9359	10.6056	19.8634	4.7158	12.4099	26.4004	13.3547	26.707	12.2534	22.4222	18.2582
9.1667	16.3174	2.1452					9.3333	7.9739	9.0666	13.8424	23.788	10.2904	12.7098	4.7122	9.6141	13.3433	43.919	7.9868	12.4672	4.9385	12.9821	22.5651	10.8765	18.832	13.4678	18.0927	15.9621
9.3333	14.3715	1.9326					9.5	9.3862	8.5645	14.3474	22.805	8.3046	10.8706	5.7722	9.8214	9.3092	35.4755	7.7522	14.3756	4.7415	14.2358	21.2503	9.7751	17.9844	15.5552	19.0326	13.543
9.5	13.6451	1.6024					9.6667	10.8721	14.4478	12.8289	28.4675	1.8902	11.4946	4.6051	7.492	12.4463	36.1104	9.2714	17.5202	3.4865	9.3347	29.2384	10.6612	19.7695	10.5856	22.4533	16.6879
9.6667	14.4832	2.0032					9.8333	9.4304	14.92	13.3107	31.2147	2.2434	8.8016	0.887	8.9961	18.2742	53.9086	10.9365	20.8733	2.7541	6.7575	31.5058	15.953	30.6836	12.7981	24.5067	23.1867
9.8333	17.0971	2.8655					10	11.9461	18.1666	10.5762	30.7164	6.8007	13.7377	3.2376	8.453	17.5643	54.8717	11.3639	19.5472	7.8254	10.3875	27.6954	15.5258	25.1875	14.333	23.7985	21.4154
10	17.6575	2.5557					10.1667	10.7427	19.2748	13.7693	32.669	4.844	16.6015	3.7758	9.0068	19.3454	58.0332	8.8467	21.071	10.1426	11.4839	33.163	14.7492	31.7383	15.5474	25.6603	23.7566
10.1667	19.2111	2.8309					10.3333	11.3664	19.3566	15.208	32.6825	3.4648	15.4455	3.0344	9.4462	19.4772	52.099	12.2733	22.4438	7.2515	8.2907	33.7236	15.6564	30.9883	15.3988	30.4218	25.8518
10.3333	19.194	2.7276					10.5	10.928	22.592	14.7063	31.8678	10.548	14.7197	12.0387	9.9285	20.9267	53.2262	11.1945	21.1932	13.1195	19.2766	28.2759	15.4729	27.5156	15.2347	27.2148	24.4987
10.5	20.2239	2.3005					10.6667	13.6527	23.3656	20.006	27.8447	10.8388	18.7264	13.8373	13.8121	18.2147	50.2246	15.9866	26.9937	11.1749	21.085	32.002	16.9556	28.0391	13.2385	27.1926	25.0072
10.6667	21.4099	2.0752					10.8333	15.8948	22.2462	21.2819	27.7033	18.0466	19.9383	16.8717	16.1629	20.4888	43.2495	16.4712	21.2722	15.1283	21.9936	27.7996	15.5046	25.7891	14.664	28.5199	24.7243
10.8333	21.6875	1.5172					11	16.0331	28.6984	24.897	30.7332	11.7527	22.1945	11.4373	15.2947	21.254	47.8708	18.3448	24.0108	13.6591	18.4773	29.4716	22.9675	24.0195	17.4341	34.867	24.753
11	22.9085	1.9428					11.1667	18.9872	25.4407	25.9038	28.9692	18.7819	20.9366	17.9317	20.1536	21.203	47.0113	20.8021	23.4214	17.968	22.6619	31.997	16.3236	27.082	16.41	29.4775	27.1803
11.1667	23.9321	1.5893					11.3333	18.2693	25.5225	24.6013	29.9724	17.4692	21.692	18.5468	20.2644	22.627	46.8386	19.0744	24.5858	17.6939	21.6747	32.3642	18.1205	28.7305	17.9892	36.956	25.0523
11.3333	24.4022	1.6897					11.5	20.7468	30.2566	26.6913	30.7871	17.5855	21.1501	18.3765	21.3148	24.5101	41.2369	20.9089	27.0907	17.7282	24.0248	33.4954	20.9306	28.6016	15.7637	36.0518	24.2199
11.5	25.0736	1.5024					11.6667	19.4021	32.7185	26.0467	29.9724	14.0792	20.0729	18.0525	17.0632	25.8704	48.5273	19.421	27.3747	15.8179	21.0239	37.5143	21.8061	29.3477	20.8949	36.5463	29.9889
11.6667	25.577	1.9309					11.8333	18.9284	35.318	23.1758	38.1396	10.1034	23.4655	13.8648	16.045	31.6684	62.3521	22.0346	36.248	17.4583	18.4117	44.5646	25.2198	36.9727	21.3457	37.9359	32.7361
11.8333	28.2994	2.7966					12	18.1575	36.5749	23.9833	36.517	12.6708	21.6296	19.0356	16.4202	30.0319	68.1869	19.8301	34.9182	12.8111	19.0277	39.8214	26.4165	39.2383	20.3555	34.3637	36.3361
12	28.3163	2.915					12.1667	20.9321	35.4035	26.6979	35.5844	15.7409	23.6264	21.6965	19.7178	30.3804	65.9454	23.731	36.1905	18.028	25.8158	43.3292	25.3998	37.1641	21.7236	36.7823	36.4304
12.1667	30.016	2.5695					12.3333	21.9002	32.3726	31.4361	32.366	22.5541	25.2619	20.6777	19.2926	25.1817	55.4418	23.7518	28.7296	19.1159	27.3228	36.8841	24.669	37.6523	21.8721	31.4106	32.2645
12.3333	28.5079	1.8905					12.5	21.7325	28.0067	30.848	29.0735	24.2366	24.0074	23.0531	24.3158	24.1105	44.4891	23.9316	24.5535	13.5049	30.5814	27.1893	21.0788	26.6289	17.1266	34.9294	26.1593
12.5	25.9778	1.4393					12.6667	21.8207	26.9134	29.5886	25.9123	21.4033	21.6723	26.7657	19.5427	21.7173	33.938	21.245	20.0359	16.1777	29.9393	21.9102	15.4411	22.3984	15.5969	28.5466	21.809
12.6667	23.1187	1.1148					12.8333	23.2419	29.7694	27.5984	28.8816	25.2088	23.6362	25.2636	22.6009	24.8799	41.4399	21.6463	25.6963	17.5611	28.061	26.3954	18.5724	25.6094	16.152	29.0856	26.2044
12.8333	25.3752	1.1914					13	20.5438	31.1491	27.3791	31.0968	17.1451	21.5442	23.767	21.5791	24.5696	49.2744	20.2627	28.6828	21.2062	26.305	36.8345	23.3099	33.0195	20.0036	31.6155	31.3174
13	27.0303	1.672					13.1667	19.9935	36.9059	27.1564	36.6651	12.297	25.8596	17.0777	19.3783	30.8565	57.7611	20.8412	34.4187	18.3493	21.6442	43.3193	27.4049	37.2422	21.4917	39.7265	35.7579
13.1667	29.2073	2.4683					13.3333	19.7346	36.3592	26.1563	39.3449	7.7562	23.0944	13.516	18.796	30.4187	63.6477	21.0444	35.2165	13.4792	15.1618	47.2984	26.5718	44.0547	22.4507	36.3146	38.46
13.3333	28.9438	3.0673					13.5	19.3903	34.3436	21.2852	42.3445	11.0423	21.5048	17.6845	16.9453	31.5749	74.9417	21.5656	35.6083	12.6569	18.0142	47.0156	26.7836	44.7969	22.7634	34.6844	41.4941
13.5	29.822	3.4056					13.6667	20.7468	31.7925	26.8142	36.1904	9.7711	21.8037	17.9866	18.7424	28.4123	52.8764	21.06	31.1662	13.5478	18.9752	36.2044	24.6726	39.1211	18.5182	28.9653	30.4974
13.6667	26.3932	2.2403					13.8333	19.2226	30.2492	23.9035	31.2988	10.9177	21.3931	13.6341	17.7385	26.2742	50.501	18.7279	27.8239	11.1792	14.4062	37.291	23.4547	32.8594	18.4244	24.9922	31.7848
13.8333	24.3038	2.1718					14	19.0549	25.6266	21.8102	26.3433	10.6186	18.3914	13.1865	17.3812	25.56	47.793	14.2094	25.9802	11.4918	14.9696	37.3356	21.0753	31.7461	16.9155	24.9298	28.845
14	22.6632	2.0521					14.1667	16.3391	23.6333	16.4274	25.0808	11.0631	16.4899	13.3403	13.9764	20.7651	40.4725	13.6283	23.8527	11.0421	15.4239	27.9385	17.2733	22.7578	14.3226	20.5381	22.9202
14.1667	19.3643	1.5605					14.3333	14.9532	19.9963	17.7565	21.7849	10.3776	15.5243	14.1723	14.2265	16.9309	35.8297	8.0102	19.6765	10.5581	17.8657	24.9467	15.8294	21.207	11.912	17.5805	19.107
14.3333	17.4123	1.3501					14.5	14.3589	20.8814	17.9459	25.4713	7.4156	15.4685	11.4016	14.7374	17.2412	37.6954	11.1737	21.3226	8.0995	14.6988	31.352	14.1702	25.5742	10.927	20.5247	18.8528
14.5	17.9656	1.711					14.6667	11.39	20.3793	14.0185	27.3128	6.5058	13.094	6.1319	12.0507	21.271	46.0223	12.7423	19.8491	7.9839	11.1475	35.4106	15.2363	24.5742	11.2501	19.5715	21.481
14.6667	17.8711	2.2198					14.8333	11.7548	18.7765	14.8192	24.1584	7.939	13.3797	9.8638	10.6395	16.7141	39.734	10.1678	21.2435	7.4014	10.0555	24.5795	13.6407	24.5586	12.4306	20.0882	18.3607
14.8333	16.5153	1.7386					15	10.6691	16.7869	12.6495	23.6264	9.634	13.1203	6.0029	11.5255	16.4973	42.118	12.1456	18.6631	9.2689	12.4012	22.6941	12.8746	24.3203	10.9817	19.3666	20.9029
15	16.3124	1.7861					15.1667	12.1609	13.5106	14.2743	22.0172	14.1498	9.731	7.6505	12.4759	16.3231	36.4905	8.104	18.451	6.4805	16.7955	26.0581	9.0373	25.7969	11.4951	16.5961	17.8646
15.1667	15.7731	1.649					15.3333	12.1962	15.5188	11.2075	18.7752	10.253	12.9068	10.4432	10.2322	12.6504	28.5307	8.5679	19.0548	4.2018	12.2614	22.3964	8.7372	20.2109	10.9165	17.0549	14.1744
15.3333	14.0145	1.2575					15.5	10.7603	9.7174	14.075	14.291	11.7652	8.1119	7.7109	10.6324	8.4208	24.6437	4.495	11.2237	5.4354	17.2236	16.6063	5.8637	14.3594	7.1743	11.2601	13.8792
15.5	11.3825	1.071					15.6667	6.7322	9.0257	11.6992	15.8733	7.9889	8.483	7.9388	9.3998	8.9777	23.8274	8.0597	6.6164	5.5168	15.0483	14.6614	6.2026	8.9375	6.4759	11.5763	9.1968
15.6667	10.1119	0.9808					15.8333	11.749	14.1242	12.5365	17.6912	10.4358	13.3699	6.7058	8.0171	10.1892	30.3619	6.2357	15.2453	4.356	13.2748	21.3793	10.6365	15.4922	7.031	15.879	14.3835
15.8333	12.9547	1.3168					16	8.6271	10.9186	11.0879	15.7117	10.7848	10.2138	7.9031	7.7242	8.4123	27.0234	6.8923	10.8715	2.8997	17.0838	12.8454	8.2218	11.875	7.818	12.6943	10.6974
16	11.0153	1.0964					16.1667	8.3358	6.4708	13.5998	15.4289	6.8589	10.6933	7.266	10.6931	7.8385	22.2121	5.2038	10.4223	3.4737	15.3278	15.9613	6.1779	12.7813	6.2883	12.7923	8.4915
16.1667	10.3159	1.0307					16.3333	9.4892	8.0253	10.7822	14.6647	8.5165	4.9788	5.3246	12.0865	6.7205	26.5008	4.7764	7.9209	4.0348	11.5931	14.9144	8.1759	14.0664	5.1885	14.0038	9.2378
16.3333	10.0501	1.166					16.5	8.989	4.1949	10.9882	15.8699	9.7254	8.2039	8.5649	8.528	8.2635	21.1886	6.822	9.0854	2.7884	12.6283	13.0092	5.8919	8.8945	3.578	12.6097	6.2569
16.5	9.304	0.9669					16.6667	2.3421	5.6861	11.779	16.4018	7.7479	6.7063	6.0962	7.6777	7.1116	23.5553	9.2428	9.5777	6.5276	12.4186	13.9221	6.1814	9.332	8.1672	16.9747	7.651
16.6667	9.755	1.0948					16.8333	6.3614	12.5288	8.9281	20.1387	6.3063	9.4978	4.9429	5.0625	10.7715	35.6267	6.7073	18.2821	3.7521	9.6099	22.7189	10.6047	21.3555	8.0525	16.8456	16.1999
16.8333	12.7147	1.7742					17	6.8352	6.9245	11.1709	14.5906	6.809	9.3139	4.6628	6.4737	4.1148	26.0473	6.1366	10.3684	2.4029	15.2579	14.974	4.9705	9.875	2.6164	9.6165	6.1257
17	8.9643	1.2401					17.1667	7.2854	12.2239	7.9612	20.977	3.3817	9.6161	4.3772	7.5706	13.0159	26.341	8.8336	14.5013	4.4588	6.6833	20.2927	11.6285	15.1563	8.8604	19.5671	12.1571
17.1667	11.7444	1.3857					17.3333	6.0201	9.0814	8.7287	22.7983	4.4743	6.9493	3.1085	4.4087	13.2795	41.1937	4.8025	17.1644	4.583	7.0415	24.0734	12.1439	22.1367	9.7725	17.5894	16.9257
17.3333	12.8138	2.114					17.5	6.8234	12.5883	6.9012	23.3874	3.9051	7.6292	3.0783	7.4955	11.3029	38.1057	8.2864	19.5759	2.5142	7.2686	26.3905	9.2703	19.1758	8.3783	18.2175	13.3257
17.5	12.681	2.0152					17.6667	3.8369	9.379	6.137	22.4313	6.7259	5.5306	3.8829	5.8735	10.9373	27.9433	7.2076	14.5049	2.647	10.9684	21.7365	7.5017	18.7656	8.334	13.4292	14.1006
17.6667	11.0937	1.562					17.8333	6.741	7.8245	8.1041	16.688	8.3752	9.5767	4.4156	4.6695	5.1817	30.6988	4.2474	7.6694	3.0968	8.2427	17.1173	7.2016	16.8438	9.3295	13.1887	13.3544
17.8333	10.1283	1.4454					18	8.0151	1.9896	8.7719	12.0556	11.0299	5.9279	4.1191	7.467	2.933	20.7308	1.7928	4.6289	2.3472	10.2695	8.9804	0.473	9.3125	5.2511	7.4295	6.5685
18	7.0047	1.0339					18.1667	4.1723	7.7092	9.2039	14.9609	5.8452	5.9115	4.6793	6.4987	4.9139	24.7473	2.2488	5.8904	1.709	8.8237	9.9876	4.1162	13.5078	4.9566	14.6675	6.466
18.1667	8.0508	1.2141					18.3333	0	4.2581	8.8949	14.695	6.2606	4.6701	5.4674	6.2415	5.4665	21.845	6.4884	5.4376	5.8466	10.9466	13.6443	3.1807	9.0938	5.4856	12.3424	7.2615
18.3333	7.8763	1.0873					18.5	5.1609	2.4768	9.3301	11.4867	7.32	2.9952	4.2866	6.4202	4.9309	25.3088	2.1289	6.6703	1.1693	8.0854	12.1508	1.9134	8.0625	5.0322	10.9216	4.1904
18.5	7.002	1.2057					18.6667	3.1278	4.3585	9.5229	14.9239	6.8547	0	2.9273	4.3015	3.847	24.7128	1.6859	6.2498	2.4885	8.2776	12.0069	5.2706	12.5508	5.7775	9.3092	7.9872
18.6667	7.309	1.26					18.8333	3.828	5.0019	7.1305	17.0145	2.7793	5.3861	0	1.8792	6.9245	25.0497	4.5419	10.3109	2.2872	6.229	17.3654	7.0498	12.9922	7.8441	14.9214	6.6136
18.8333	8.2575	1.4058					19	2.96	3.7598	6.0008	15.1225	6.7883	2.1577	3.5918	4.8446	5.3092	25.041	6.3529	7.0261	7.1401	8.4305	11.6795	3.5267	10.3008	3.4712	15.0016	4.4528
19	7.6479	1.2395					19.1667	6.2997	15.0576	11.1643	24.3301	13.2525	15.1959	10.1604	5.4591	11.0053	41.6602	10.418	17.3046	14.5886	15.1618	28.8316	12.9735	22.2539	5.7879	34.3014	17.5981
19.1667	16.6402	2.1192					19.3333	9.6451	28.2856	16.9192	31.3089	26.1352	28.6545	24.7748	3.3798	19.3921	51.2698	22.5089	24.3055	21.6088	21.251	43.1307	17.5063	32.3672	9.6474	50.4521	29.2263
19.3333	25.5885	2.7726					19.5	18.0633	43.2875	29.3494	42.7586	28.3578	39.0817	30.4179	13.3619	30.7588	66.8351	32.6949	38.3971	27.9907	26.9515	48.7274	28.697	42.0469	20.7229	60.2067	41.6786
19.5	35.5193	2.9541					19.6667	22.5328	49.9665	36.5564	55.309	30.813	47.7684	37.9861	19.1568	39.6217	85.6051	39.113	42.1527	32.1969	31.5642	56.4971	36.0434	52.1211	35.0142	63.9348	51.0476
19.6667	43.25	3.4007					19.8333	30.5155	59.286	45.3283	66.4422	32.4332	51.7423	40.9408	25.9307	45.7598	97.0113	46.8105	50.0773	38.2662	33.7876	63.6567	42.9484	54.9297	43.3586	67.948	57.8129
19.8333	49.7493	3.6478					20	34.7025	63.5924	48.8072	75.0606	37.2772	49.6962	45.0461	30.6288	50.2189	106.725	52.3609	54.3001	40.9132	39.1037	66.1871	47.6612	58.4492	47.6637	73.2395	66.4685
20	54.4051	3.9137					20.1667	40.1754	67.4266	59.4331	76.855	49.1338	55.9165	57.0354	38.4494	51.0563	100.717	55.7406	52.7655	42.5194	48.9931	57.7871	48.9321	64.0469	50.1655	70.3978	62.6594
20.1667	57.5103	3.1653					20.3333	41.9437	63.0643	62.4003	70.8423	53.1345	54.6192	56.1594	43.3548	50.3677	92.904	54.7738	51.0368	45.3506	50.7972	45.1997	49.6346	53.707	50.1941	66.8211	56.9929
20.3333	55.6649	2.591					20.5	47.5313	73.9122	62.7924	82.3929	43.139	58.5536	53.9461	42.8832	59.2901	109.091	60.1339	59.6622	45.1964	43.1136	71.7043	55.7736	62.3164	58.3301	76.1035	66.5792
20.5	61.6223	3.5549					20.6667	45.3363	72.9528	64.8491	80.676	52.9808	58.5898	61.7613	46.2237	61.254	112.361	56.7646	63.8383	45.5133	50.8977	67.5465	57.3375	64.2383	59.792	74.2862	65.6525
20.6667	63.1426	3.3481					20.8333	44.9921	72.6218	62.932	85.8504	45.7895	61.8411	54.3058	47.6706	59.6557	112.883	58.091	66.2785	42.9349	43.8824	77.9906	61.136	66.1328	59.0519	82.4507	66.6038
20.8333	63.6547	3.7996					21	47.7932	78.122	65.9988	87.133	52.5446	65.5095	54.4486	46.9489	66.4995	121.111	63.2948	66.3863	48.0961	48.3991	74.835	63.7201	71.4961	63.1329	74.941	71.8931
21	66.6152	3.8068					21.1667	51.327	75.8498	68.7799	82.8474	56.8859	59.8608	62.8844	50.7646	62.5802	111.113	61.5228	64.5678	47.3765	53.4705	66.8172	57.6905	64.9453	59.8598	76.2238	71.6266
21.1667	65.3497	3.1521					21.3333	51.43	71.283	73.2656	78.6594	58.0034	61.3058	65.8914	53.8692	62.3039	99.4429	63.412	54.7062	46.3314	54.5582	60	52.84	58.7539	58.8825	72.224	64.1232
21.3333	63.0643	2.6421					21.5	54.3665	74.0982	71.7072	79.767	52.8437	65.411	59.2514	50.8146	59.0308	102.591	65.283	62.0809	51.6769	51.9242	64.5845	56.6844	61.6094	65.176	70.9812	65.1523
21.5	64.2517	2.6913					21.6667	55.6847	79.907	69.9993	84.8505	54.0941	64.9512	64.1202	49.0854	64.2721	106.88	63.2817	69.3154	46.3229	55.1828	72.002	61.0407	65.5664	63.5577	79.453	68.3259
21.6667	66.8947	3.0511					21.8333	51.2564	76.72	70.4944	83.8709	58.0242	63.7032	65.0538	55.5448	64.7694	101.615	62.8778	61.779	47.2952	58.7734	65.542	59.5298	62.9492	64.0085	71.195	65.8207
21.8333	65.5412	2.6302					22	54.546	68.3302	73.7905	76.2355	56.0924	60.649	62.8021	54.055	60.6759	96.005	61.3248	59.7844	52.8548	57.594	60.4416	53.8462	62.4219	58.5412	69.7475	63.012
22	63.1375	2.2481					22.1667	52.3304	76.9803	74.3222	82.2515	53.2383	63.7492	65.6689	57.2526	61.1137	96.3894	63.5866	62.469	55.7588	57.8124	74.8846	61.9939	59.9297	60.5973	75.6314	65.6115
22.1667	66.0786	2.4478					22.3333	51.5859	84.0089	66.9292	93.755	49.678	67.1713	60.564	53.4191	74.1382	119.668	65.3716	78.1887	54.7008	49.6877	83.359	71.4124	78.7539	67.7247	82.905	80.688
22.3333	71.6855	3.8387					22.5	55.0227	88.479	65.7862	98.4447	42.25	68.4949	56.7196	50.05	72.6971	133.424	64.5247	80.1258	51.2229	48.0671	85.3585	69.845	87.3008	67.0784	82.1344	83.5008
22.5	72.5263	4.7242					22.6667	54.8402	88.9996	64.57	99.6364	43.2263	65.6081	53.2239	50.5073	73.2582	140.688	61.4082	81.071	52.0752	47.7963	91.2379	72.7504	85.1094	70.4975	77.9208	81.2087
22.6667	72.7817	5.0354					22.8333	58.4653	89.9777	61.2573	100.317	42.7278	64.7772	54.3662	46.6881	75.6769	145.452	57.6662	83.5687	49.017	49.478	89.6304	72.588	91	66.8699	75.4621	86.5349
22.8333	73.076	5.372					23	54.3606	84.9089	65.723	92.0145	46.6952	59.2433	59.4382	52.7688	72.5526	127.693	58.5679	77.6316	48.0276	53.3919	82.3319	64.5921	80.207	66.7996	64.9102	78.9864
23	69.5422	4.2046					23.1667	55.6818	75.5374	68.8331	80.0936	43.1764	53.0888	57.0244	56.7417	64.2295	100.726	54.8754	71.1626	43.3932	48.3336	64.1627	62.8023	66.2422	61.0273	57.7391	63.4958
23.1667	62.4183	2.9455					23.3333	50.0824	73.6147	66.464	84.6553	39.5912	50.4614	54.6765	53.562	62.4485	104.483	50.9068	69.3154	34.7625	46.9488	72.5775	61.4855	75.6328	56.1019	48.8575	67.6124
23.3333	61.212	3.6436					23.5	52.7099	63.8267	64.6033	72.6165	35.1668	42.9702	45.48	51.6613	56.7864	93.906	43.3526	62.0485	30.1752	39.6584	55.8224	55.3182	62.7969	54.2256	40.6307	51.9414
23.5	53.7849	3.215					23.6667	51.3064	56.8092	61.1676	62.6919	31.9388	36.7401	41.0479	49.8214	51.7492	66.7487	34.6102	51.2812	23.2878	38.7105	50.8063	53.1225	55.3906	48.9563	33.709	49.0631
23.6667	47.4479	2.5421					23.8333	42.3822	47.7017	60.2838	51.589	28.1916	31.6923	36.9783	46.2701	44.8077	60.6634	29.0286	46.8643	20.3923	32.001	39.8115	46.7399	45.6758	43.6427	26.0746	39.4276
23.8333	41.0109	2.4053					24	35.2586	40.4351	54.8312	48.6904	24.7102	26.5756	30.6486	42.0114	44.3868	59.6571	24.9844	46.6415	14.8285	30.0223	39.5187	42.779	49.457	40.4894	20.498	34.86
24	37.5642	2.6247					24.1667	36.2826	37.3633	51.3424	46.2766	24.3945	24.2438	28.3694	40.4645	39.6089	54.1764	20.5962	40.9955	12.3999	26.8379	37.7524	35.4644	45.1992	37.7323	17.7899	33.0682
24.1667	34.5179	2.475					24.3333	33.9051	29.8624	47.3452	37.2778	21.9434	18.6443	23.5638	36.9668	35.5154	49.2442	18.7982	36.9668	13.1666	23.2298	39.0772	36.6858	39.3359	33.2109	16.3066	24.1994
24.3333	30.7623	2.289					24.5	29.8711	26.0431	42.2814	32.0428	21.5612	15.7969	22.8416	28.9603	29.22	47.3007	13.0264	31.159	9.8257	24.1034	29.4468	29.5584	34.8672	29.7449	7.9195	27.0491
24.5	26.631	2.1888					24.6667	25.281	19.5984	40.1748	21.3103	16.9582	12.0628	16.4735	29.2033	20.7736	24.0909	7.5464	24.7583	8.8063	19.7528	19.8412	25.481	22.6484	21.5334	11.7723	14.8961
24.6667	20.1481	1.6697					24.8333	22.7535	19.9814	33.6922	24.4075	18.2294	11.7738	15.6415	25.3448	22.0361	37.5745	8.5157	27.903	8.5707	20.0149	24.2124	26.5824	32.1367	25.0072	12.966	19.3571
24.8333	21.835	1.7673					25	17.4896	19.855	30.1236	22.3371	15.1593	15.1236	15.5948	20.468	19.6854	26.8895	9.5997	23.9964	8.4722	18.1453	23.2002	24.0901	29.6992	21.2623	12.8992	20.7635
25	19.7427	1.3193					25.1667	16.5127	14.8643	27.3558	16.1089	13.2317	8.6243	14.0625	20.075	19.4134	19.962	6.8011	20.8482	4.8529	17.9837	17.4498	18.5936	19.1484	16.35	6.7258	9.5289
25.1667	15.4246	1.274					25.3333	18.6518	12.4433	25.6679	13.5706	15.0638	5.813	10.8853	18.5888	15.4687	14.9434	5.1699	19.062	3.8206	18.3681	19.092	15.2964	21.1602	13.0144	8.3872	13.8054
25.3333	14.4136	1.253					25.5	12.0814	9.669	19.0424	6.7769	17.1867	11.5932	12.8323	16.2415	11.6387	10.1451	3.583	14.8751	2.3686	16.5771	13.1034	9.7363	11.7148	5.2485	2.9041	3.6574
25.5	10.5488	1.1317					25.6667	14.8385	8.0253	20.9995	8.0696	11.2293	7.8558	10.77	15.5627	9.7811	6.6122	1.8319	9.4951	3.7906	14.4018	7.998	10.1317	10.7461	6.7626	5.3049	3.7968
25.6667	9.4002	1.0189					25.8333	12.4669	9.0443	17.3279	6.8004	14.3077	7.9444	11.613	13.5656	7.7109	10.2013	3.5074	9.1213	2.9725	16.5596	13.2126	9.5068	11.3828	5.5143	8.543	5.5927
25.8333	9.8448	0.8934					26	10.7897	8.9996	17.5505	12.564	15.9487	6.3319	9.2871	12.7796	10.1126	15.7856	1.1387	11.2489	2.2572	16.8742	12.6718	7.3358	14.4453	4.4432	0	6.9458
26	9.8755	1.1664					26.1667	8.6565	0.8256	15.0784	1.8785	14.4988	4.6898	12.7197	13.5155	3.7747	3.6668	-0.37	4.3594	0.1156	16.149	5.3882	5.7507	5.4844	0.5759	3.8306	1.5171
							26.3333	11.9196	5.5783	13.7228	6.7297	14.7023	4.808	5.9205	11.4791	4.2848	8.5255	3.4318	9.9515	3.9748	16.7038	12.0417	5.2671	8.7617	1.7252	2.0355	6.2487
							26.5	7.5678	7.2146	13.5865	6.9048	12.9658	3.8753	7.3978	11.7578	5.2455	8.2189	3.7054	4.0144	2.1502	14.5896	11.6398	5.1753	9.332	2.7415	2.8284	7.3312
							26.6667	9.6746	6.6233	13.1512	9.359	13.6097	3.5732	8.705	12.4759	6.0659	13.4275	4.6852	7.9461	2.8526	14.5765	12.9893	6.718	11.1992	6.4082	6.3026	7.0852
							26.8333	8.8213	4.9647	13.3606	3.5753	13.0946	5.9148	7.5791	10.9932	3.3879	8.6033	3.5152	4.5786	4.8657	12.3313	7.7549	3.7773	4.2383	1.1284	6.5431	4.1822
							27	7.5207	8.1666	8.3865	10.4397	15.1469	7.731	9.8171	11.2719	8.7566	21.0849	2.9159	11.7305	4.9086	14.6639	10.0819	8.6384	12.7422	8.0317	5.7414	12.9772
							27.1667	9.8953	9.6058	8.0808	15.2437	7.4239	7.57	8.5429	8.9068	8.7056	24.7992	4.9458	14.5445	7.7183	9.0333	20.6897	6.2555	18.5586	7.388	10.9973	11.3617
							27.3333	9.3715	16.3221	6.4494	21.1756	6.863	8.9461	7.4171	4.9125	12.4803	37.7732	9.7795	18.7709	7.4699	11.0601	20.2977	9.1468	21.3438	6.9997	12.9348	20.0582
							27.5	9.2509	9.2414	7.2069	13.3618	7.3408	8.9822	6.2555	7.91	12.3401	26.3194	6.1106	14.5229	6.0179	8.7581	23.6021	10.5306	19.7461	7.9066	14.7922	16.5812
							27.6667	4.3106	11.0413	7.2568	14.6075	8.6037	8.772	3.644	10.1536	7.5027	28.8071	7.1347	10.6164	5.6495	7.8976	15.9563	8.8537	18.9805	10.2181	8.2936	15.1585
							27.8333	5.4758	11.6103	7.9844	17.3714	5.0185	9.3993	3.8774	6.881	10.6057	22.7131	6.3269	13.0422	8.0439	7.6486	22.7289	8.5819	15.5586	7.6955	13.2333	12.8665
							28	4.2988	8.9624	8.217	15.7117	8.8488	9.0381	4.4376	7.8028	9.9511	29.4636	4.2422	14.3684	4.5659	8.9285	16.8693	9.2844	15.2539	6.1658	8.9573	12.7968
							28.1667	6.4762	7.4266	9.3567	8.0158	9.4595	0.7882	5.5525	6.288	2.4485	16.2607	1.9022	6.8284	2.1802	10.4573	11.8581	6.4214	10.2227	5.7957	7.4028	5.605
							28.3333	7.6002	5.608	8.443	10.7561	10.7972	4.1479	4.7809	6.5559	5.0627	17.0381	4.7113	3.2058	-0.3512	8.4655	14.7408	4.1233	9.7188	3.307	5.0599	8.9631
							28.5	9.6275	6.8687	6.456	10.8605	7.7022	5.0445	0.541	3.5548	5.441	20.8344	4.5992	7.6694	1.1179	7.5787	11.6795	3.3078	10.6484	3.6666	10.7345	6.2364
							28.6667	8.5888	8.981	5.2698	17.7249	0	4.8507	-2.7433	2.115	9.0967	34.7283	4.9223	15.2992	2.2101	2.1404	21.9648	10.5059	16.293	7.1118	14.1865	10.5047
							28.8333	5.0168	8.5236	3.4556	21.2429	0.2451	8.529	0.1126	0.5681	11.6939	41.8416	5.8552	19.2129	3.0154	0	26.6534	10.2517	21.332	10.2572	14.672	15.8145
							29	4.4224	12.0937	0	19.7011	3.4191	9.511	0.5657	1.079	6.6015	39.9197	6.9835	19.4106	4.5402	5.6349	22.2426	10.4282	19.9961	6.1423	11.7768	17.2045
							29.1667	6.179	12.778	0.2193	16.5365	1.6659	8.7261	1.5515	0	7.8597	36.6459	4.6592	15.0548	4.5488	2.337	20.7889	8.7055	20.4688	9.0011	13.1709	11.5462
							29.3333	2.095	12.4805	1.8873	20.0949	3.901	6.8409	3.0701	0.2894	10.1211	42.2346	7.0565	14.6846	4.9857	7.072	23.3193	12.8323	21.6836	3.9377	16.8411	18.5698
							29.5	2.2068	11.0822	4.7382	16.6779	7.3532	11.5176	3.5671	2.5652	8.3231	34.4778	5.0813	12.6397	6.7289	6.3251	19.3153	6.3614	17.6602	3.5832	17.1395	14.933
							29.6667	4.496	9.193	5.5489	12.3451	10.0079	8.1185	7.9608	3.5656	6.1977	30.5606	2.6762	10.4007	4.4031	11.4445	15.9811	7.7841	13.7813	5.9729	7.7814	11.579
							29.8333	6.3644	5.8609	8.1639	8.5106	13.6471	5.8951	6.5493	5.1804	1.7981	13.9889	5.1021	5.3908	5.928	9.7978	7.1049	3.2266	9.418	4.868	11.4427	9.0164
							30	8.068	4.1502	9.2138	6.9923	15.4751	6.5651	7.3347	4.5552	3.7237	16.3125	5.1803	3.1482	5.4183	11.0776	4.0585	3.4172	10.1992	2.8536	9.6699	5.4779
							30.1667	5.9024	6.1956	5.7848	7.0765	14.4946	7.3139	8.6665	6.413	4.4038	12.2398	4.2865	2.6164	5.1484	13.6155	6.3111	4.4728	6.918	5.0504	9.425	3.6492
							30.3333	7.0735	4.9424	8.3566	7.3761	16.1896	10.1974	6.2994	5.5091	3.3836	11.0434	4.8989	5.0099	6.4205	13.2792	7.6656	3.5479	5.4531	2.5904	8.8148	4.9367
							30.5	6.8616	4.7601	7.6023	4.6761	15.2881	6.2465	9.3283	6.6059	2.1849	5.796	2.9915	0.575	3.0539	13.4058	0.6252	2.3899	3.0039	1.5271	4.7748	2.3781
							30.6667	7.3118	10.238	10.6925	5.9756	12.5961	7.1759	8.7297	8.0707	4.2848	6.7332	6.7047	4.9416	3.3837	14.2227	7.8988	4.6387	7.0313	2.5174	2.432	5.3959
							30.8333	9.345	5.9576	8.0177	8.1673	13.0032	7.639	9.6331	3.5298	4.2976	12.0325	5.0292	4.4528	6.322	12.9909	7.5118	4.2645	6.0313	3.1897	4.5388	5.9617
							31	9.8894	11.852	8.8949	12.9208	10.1201	9.6719	4.8166	2.6581	4.9139	20.748	5.837	11.6586	9.3288	9.4439	16.775	9.5245	8.2734	4.7299	16.3823	11.005
							31.1667	7.2383	14.087	9.576	16.4692	10.8886	9.6982	12.2089	7.3026	7.3539	25.3865	3.596	12.9524	7.8083	14.8823	15.222	7.8017	15.4922	11.0833	12.2578	13.1371
							31.3333	7.5031	3.5627	10.8353	5.979	13.8216	9.5734	13.1371	8.278	5.6578	10.171	6.736	2.9398	1.8503	16.7693	3.1208	4.4869	2.5273	2.5018	7.9506	3.8173
							31.5	8.1622	12.1644	8.7287	11.5035	13.5183	12.0924	8.8615	8.3959	6.9288	16.5846	6.6578	10.7925	7.6627	13.5238	15.3758	6.7745	8.543	4.7403	14.8947	4.6496
							31.6667	9.1391	6.8167	9.4763	10.2612	12.3053	10.4995	6.5054	6.3666	3.8682	14.762	7.106	3.1734	4.0819	17.0052	5.9489	2.9583	6.793	3.1585	10.2802	3.2679
							31.8333	7.2236	6.0617	11.3105	6.2517	12.7955	7.639	11.7696	6.6595	1.6961	7.2385	0	3.4465	4.8786	16.7344	1.1908	3.5479	2.4766	0.3909	8.2669	4.1207
							32	6.3497	5.2994	11.254	0	14.0293	6.7227	9.4739	7.3598	1.9979	6.2451	2.8038	0.2624	4.3646	13.6767	1.5778	2.7677	5.3125	2.4653	6.0888	0
							32.1667	4.6607	7.222	10.8852	6.7971	15.9237	9.3107	9.8693	8.0779	2.1722	11.6438	6.6317	2.5013	2.9426	13.3491	5.3535	4.6705	4.7773	1.9962	9.5141	2.5831
							32.3333	3.3896	0	12.5964	3.5955	14.9765	4.7128	8.304	6.8596	0	0	5.1074	0	0	14.1484	0	2.8065	0	0	3.0823	1.6811

## Sheet: 6E
cytosol			mitochondria
%DF/s	SE		%DF/s	SE
2.2427	0.443		0.9565	0.1395
